# Supplementary material for: Features of noncovalent interactions in the group of highly polymorphic benzenesulfonamide derivatives
Source: Royal Society of Chemistry journal article supplement (doi:10.1039/d4ce00120f), 2024-01-01
Supplement: d4ce00120f1.pdf [file d4ce00120f1.pdf]

## ELECTRONIC SUPPLEMENTARY INFORMATION

### Features of noncovalent interactions in the group of highly polymorphic benzenesulfonamide derivatives

Arina V. Kazakova, Anton V. Savchenkov

*Samara National Research University, 34 Moskovskoye shosse, Samara, 443086,  
Russian Federation*

In the following crystal structures coordinates of several H atoms were corrected to improve the geometry of the molecule, as well as several missing H atoms were added in geometrically calculated positions.

---

#### **Sulfapyridine, polymorph IV**

#### **Crystal structure {BEWKUJ05}**

#### CORRECTED COORDINATES:

H1 from (0.1620; 0.8830; 0.6280) to (0.1700; 0.8780; 0.6360)

H2 from (0.0650; 0.2740; 0.6690) to (0.0590; 0.2730; 0.6640)

H4 from (0.6870; 0.1760; 0.6540) to (0.6850; 0.1586; 0.6648)

H5 from (0.4530; 0.0990; 0.7070) to (0.4518; 0.8417; 0.6958)

H6 from (0.3350; 0.0510; 0.5980) to (0.3350; 0.0584; 0.5870)

H7 from (0.5850; 0.4440; 0.6030) to (0.5659; 0.3702; 0.5586)

#### ADDED ATOMS:

H8 (0.6384; 0.8851; 0.7362)

H9 (0.1250; 0.1496; 0.5315)

H10 (0.0389; 0.5600; 0.7574)

H11 (0.0786; 0.7693; 0.7521)

---

---

## Sulfapyridine, polymorph II

### Crystal structure {BEWKUJ11}

#### CORRECTED COORDINATES:

H2 from (0.1260; 0.6200; 0.4480) to (0.0887; 0.6050; 0.4561)

---

## Sulfapyridine, polymorph V

### Crystal structure {BEWKUJ13}

#### CORRECTED COORDINATES:

H1 from (0.5740; 0.5080; -0.0340) to (0.5780; 0.5140; -0.0500)

H2 from (0.5390; 0.5730; -0.0310) to (0.5316; 0.5605; -0.1104)

H5 from (0.5520; 0.7040; -0.1550) to (0.5480; 0.7040; -0.1660)

H6 from (0.5730; 0.8390; -0.0870) to (0.5739; 0.8397; -0.1124)

H8 from (0.8410; 0.9070; -0.0940) to (0.8466; 0.8947; -0.1079)

H9 from (0.8130; 0.9110; -0.2750) to (0.8087; 0.9060; -0.2835)

H10 from (0.7170; 0.9360; -0.3000) to (0.7165; 0.9240; -0.3018)

H11 from (0.6590; 0.9210; -0.1430) to (0.6590; 0.9220; -0.1430)

H12 from (0.5100; 0.0620; 0.3310) to (0.5311; 0.0128; 0.2089)

H14 from (0.5510; 0.3160; 0.3470) to (0.5500; 0.3220; 0.3530)

H15 from (0.5220; 0.1850; 0.3830) to (0.5152; 0.1935; 0.3853)

H16 from (0.5580; 0.1170; 0.0960) to (0.5678; 0.1114; 0.0846)

H17 from (0.5990; 0.2460; 0.0590) to (0.6030; 0.2460; 0.0590)

H18 from (0.7710; 0.3880; 0.2040) to (0.7710; 0.3696; 0.2009)

H19 from (0.8170; 0.3570; 0.3410) to (0.8234; 0.3363; 0.3532)

H20 from (0.7850; 0.3070; 0.5250) to (0.7864; 0.3175; 0.5252)

H21 from (0.6910; 0.3500; 0.5470) to (0.6895; 0.3326; 0.5492)

H22 from (0.6460; 0.3830; 0.3710) to (0.6368; 0.3664; 0.3966)

---

---

**Sulfamerazine, *Pbca* polymorph**

**Crystal structure {SLFNMA01}**

*CORRECTED COORDINATES:*

H2 from (0.4800; 0.4910; 0.1320) to (0.4877; 0.4961; 0.1349)

H10 from (0.0540; 0.1890; 0.3810) to (0.0473; 0.1850; 0.3690)

H11 from (0.1830; 0.1450; 0.3470) to (0.1880; 0.1500; 0.3520)

H12 from (0.1580; 0.0830; 0.3980) to (0.1202; 0.1026; 0.4047)

---

## Characteristics of atomic interactions in the polymorphs of six benzenesulfonamide derivatives calculated within the MVDP method

The following Tables S1–S3 include these characteristics of atomic interactions:

- $k$  – the number of pyramids representing interatomic contacts;
- $d_{\min}$  and  $d_{\max}$  (Å) – distances for the shortest and the longest contact respectively;
- $S$  (Å<sup>2</sup>) – the total surface area of all faces corresponding to the given type of contacts;
- $V$  (Å<sup>3</sup>) – the total volume of all pyramids corresponding to the given type of contacts;
- $\Delta_S$  (%) – partial contribution of contacts to the total surface area of the corresponding faces;
- $\Delta_V$  (%) – partial contribution of contacts to the total volume of the corresponding pyramids.

The last column  $\Sigma$  shows the cumulative values for each molecule.

Table S1.1. Characteristics of chemical bonds in sulfapyridine polymorphs (VD polyhedra faces with RF = 1). The temperature at which X-ray diffraction experiments were conducted (as stated in respective .cif files) is provided below the refcodes.

| Form | Refcode           |                        | H-C    | H-N   | C-C    | C-N   | C-S   | N-S   | O-S   | $\Sigma$ |
|------|-------------------|------------------------|--------|-------|--------|-------|-------|-------|-------|----------|
| II   | BEWKUJ11<br>295 K | <i>k</i>               | 16     | 6     | 20     | 8     | 2     | 2     | 4     | 58       |
|      |                   | <i>d<sub>min</sub></i> | 0.84   | 1.02  | 1.35   | 1.35  | 1.76  | 1.60  | 1.44  | 0.84     |
|      |                   | <i>d<sub>max</sub></i> | 1.08   | 1.08  | 1.40   | 1.38  | 1.76  | 1.60  | 1.46  | 1.76     |
|      |                   | <i>S</i>               | 121.13 | 38.48 | 156.99 | 56.81 | 9.82  | 10.18 | 23.43 | 416.82   |
|      |                   | <i>V</i>               | 19.80  | 6.77  | 36.11  | 12.94 | 2.88  | 2.72  | 5.66  | 86.87    |
|      |                   | $\Delta_S$             | 29.06  | 9.23  | 37.66  | 13.63 | 2.35  | 2.44  | 5.62  | 100.00   |
|      |                   | $\Delta_V$             | 22.80  | 7.80  | 41.56  | 14.89 | 3.31  | 3.13  | 6.51  | 100.00   |
| III  | BEWKUJ15<br>173 K | <i>k</i>               | 16     | 6     | 20     | 8     | 2     | 2     | 4     | 58       |
|      |                   | <i>d<sub>min</sub></i> | 0.95   | 0.84  | 1.35   | 1.34  | 1.75  | 1.61  | 1.44  | 0.84     |
|      |                   | <i>d<sub>max</sub></i> | 0.95   | 0.88  | 1.42   | 1.37  | 1.75  | 1.61  | 1.46  | 1.75     |
|      |                   | <i>S</i>               | 118.85 | 37.84 | 147.26 | 56.75 | 10.08 | 10.38 | 24.41 | 405.56   |
|      |                   | <i>V</i>               | 18.82  | 5.42  | 34.10  | 12.86 | 2.94  | 2.78  | 5.89  | 82.82    |
|      |                   | $\Delta_S$             | 29.31  | 9.33  | 36.31  | 13.99 | 2.48  | 2.56  | 6.02  | 100.00   |
|      |                   | $\Delta_V$             | 22.72  | 6.55  | 41.18  | 15.52 | 3.55  | 3.36  | 7.12  | 100.00   |
| IV   | BEWKUJ05<br>295 K | <i>k</i>               | 16     | 6     | 20     | 8     | 2     | 2     | 4     | 58       |
|      |                   | <i>d<sub>min</sub></i> | 0.85   | 0.85  | 1.35   | 1.35  | 1.77  | 1.63  | 1.42  | 0.85     |
|      |                   | <i>d<sub>max</sub></i> | 1.08   | 0.87  | 1.43   | 1.37  | 1.77  | 1.63  | 1.43  | 1.77     |
|      |                   | <i>S</i>               | 117.70 | 38.84 | 136.35 | 53.44 | 9.83  | 9.82  | 23.64 | 389.62   |
|      |                   | <i>V</i>               | 19.27  | 5.55  | 31.53  | 12.11 | 2.89  | 2.66  | 5.61  | 79.62    |
|      |                   | $\Delta_S$             | 30.21  | 9.97  | 35.00  | 13.72 | 2.52  | 2.52  | 6.07  | 100.00   |
|      |                   | $\Delta_V$             | 24.20  | 6.97  | 39.60  | 15.21 | 3.63  | 3.34  | 7.04  | 100.00   |
| V    | BEWKUJ13<br>295 K | <i>k</i>               | 16     | 6     | 20     | 8     | 2     | 2     | 4     | 58       |
|      |                   | <i>d<sub>min</sub></i> | 0.94   | 0.86  | 1.31   | 1.33  | 1.74  | 1.61  | 1.42  | 0.86     |
|      |                   | <i>d<sub>max</sub></i> | 1.03   | 1.05  | 1.41   | 1.39  | 1.78  | 1.62  | 1.44  | 1.78     |
|      |                   | <i>S</i>               | 119.09 | 39.80 | 141.62 | 57.61 | 9.82  | 10.17 | 23.50 | 401.61   |
|      |                   | <i>V</i>               | 19.67  | 6.28  | 32.24  | 13.10 | 2.88  | 2.74  | 5.60  | 82.51    |
|      |                   | $\Delta_S$             | 29.65  | 9.91  | 35.26  | 14.35 | 2.44  | 2.53  | 5.85  | 100.00   |
|      |                   | $\Delta_V$             | 23.84  | 7.62  | 39.07  | 15.88 | 3.49  | 3.32  | 6.79  | 100.00   |
| Va   |                   | <i>k</i>               | 16     | 6     | 20     | 8     | 2     | 2     | 4     | 58       |
|      |                   | <i>d<sub>min</sub></i> | 0.97   | 0.90  | 1.33   | 1.36  | 1.78  | 1.62  | 1.43  | 0.90     |
|      |                   | <i>d<sub>max</sub></i> | 1.03   | 1.05  | 1.40   | 1.39  | 1.78  | 1.62  | 1.43  | 1.78     |
|      |                   | <i>S</i>               | 118.75 | 40.30 | 138.66 | 58.42 | 10.13 | 10.17 | 24.10 | 400.51   |
|      |                   | <i>V</i>               | 19.77  | 6.48  | 31.61  | 13.38 | 3.00  | 2.75  | 5.74  | 82.72    |
|      |                   | $\Delta_S$             | 29.65  | 10.06 | 34.62  | 14.59 | 2.53  | 2.54  | 6.02  | 100.00   |
|      |                   | $\Delta_V$             | 23.90  | 7.83  | 38.21  | 16.17 | 3.63  | 3.32  | 6.94  | 100.00   |
| Vb   |                   | <i>k</i>               | 16     | 6     | 20     | 8     | 2     | 2     | 4     | 58       |
|      |                   | <i>d<sub>min</sub></i> | 0.94   | 0.86  | 1.31   | 1.33  | 1.74  | 1.61  | 1.42  | 0.86     |
|      |                   | <i>d<sub>max</sub></i> | 1.00   | 1.02  | 1.41   | 1.39  | 1.74  | 1.61  | 1.44  | 1.74     |
|      |                   | <i>S</i>               | 119.44 | 39.31 | 144.58 | 56.81 | 9.51  | 10.18 | 22.89 | 402.70   |
|      |                   | <i>V</i>               | 19.58  | 6.09  | 32.87  | 12.83 | 2.75  | 2.73  | 5.46  | 82.30    |
|      |                   | $\Delta_S$             | 29.66  | 9.76  | 35.90  | 14.11 | 2.36  | 2.53  | 5.68  | 100.00   |
|      |                   | $\Delta_V$             | 23.79  | 7.40  | 39.94  | 15.59 | 3.34  | 3.31  | 6.63  | 100.00   |
| VI   | BEWKUJ14<br>120 K | <i>k</i>               | 16     | 6     | 20     | 8     | 2     | 2     | 4     | 58       |
|      |                   | <i>d<sub>min</sub></i> | 0.95   | 0.84  | 1.35   | 1.34  | 1.74  | 1.60  | 1.43  | 0.84     |
|      |                   | <i>d<sub>max</sub></i> | 0.95   | 0.90  | 1.40   | 1.41  | 1.75  | 1.64  | 1.45  | 1.75     |
|      |                   | <i>S</i>               | 121.02 | 35.56 | 151.98 | 53.52 | 9.92  | 9.54  | 23.12 | 404.65   |
|      |                   | <i>V</i>               | 19.16  | 5.11  | 35.04  | 12.13 | 2.88  | 2.58  | 5.56  | 82.45    |
|      |                   | $\Delta_S$             | 29.91  | 8.79  | 37.56  | 13.22 | 2.45  | 2.36  | 5.71  | 100.00   |
|      |                   | $\Delta_V$             | 23.23  | 6.19  | 42.50  | 14.72 | 3.49  | 3.12  | 6.74  | 100.00   |

Table S1.1. (continued)

| Form | Refcode                | H-C    | H-N   | C-C    | C-N   | C-S   | N-S  | O-S   | $\Sigma$ |
|------|------------------------|--------|-------|--------|-------|-------|------|-------|----------|
| VIa  | <i>k</i>               | 16     | 6     | 20     | 8     | 2     | 2    | 4     | 58       |
|      | <i>d<sub>min</sub></i> | 0.95   | 0.84  | 1.35   | 1.35  | 1.75  | 1.60 | 1.45  | 0.84     |
|      | <i>d<sub>max</sub></i> | 0.95   | 0.90  | 1.40   | 1.36  | 1.75  | 1.60 | 1.45  | 1.75     |
|      | <i>S</i>               | 121.31 | 36.53 | 154.74 | 55.08 | 9.38  | 9.72 | 21.63 | 408.38   |
|      | <i>V</i>               | 19.21  | 5.25  | 35.72  | 12.46 | 2.73  | 2.59 | 5.23  | 83.17    |
|      | $\Delta_S$             | 29.71  | 8.94  | 37.89  | 13.49 | 2.30  | 2.38 | 5.30  | 100.00   |
|      | $\Delta_V$             | 23.09  | 6.31  | 42.95  | 14.98 | 3.28  | 3.11 | 6.29  | 100.00   |
| VIb  | <i>k</i>               | 16     | 6     | 20     | 8     | 2     | 2    | 4     | 58       |
|      | <i>d<sub>min</sub></i> | 0.95   | 0.84  | 1.37   | 1.34  | 1.74  | 1.64 | 1.43  | 0.84     |
|      | <i>d<sub>max</sub></i> | 0.95   | 0.88  | 1.40   | 1.41  | 1.74  | 1.64 | 1.44  | 1.74     |
|      | <i>S</i>               | 120.73 | 34.59 | 149.22 | 51.95 | 10.46 | 9.37 | 24.61 | 400.92   |
|      | <i>V</i>               | 19.11  | 4.97  | 34.37  | 11.81 | 3.03  | 2.57 | 5.89  | 81.74    |
|      | $\Delta_S$             | 30.11  | 8.63  | 37.22  | 12.96 | 2.61  | 2.34 | 6.14  | 100.00   |
|      | $\Delta_V$             | 23.38  | 6.07  | 42.05  | 14.45 | 3.71  | 3.14 | 7.20  | 100.00   |

Table S1.2. Characteristics of chemical bonds in sulfamerazine polymorphs (VD polyhedra faces with RF = 1). The temperature at which X-ray diffraction experiments were conducted (as stated in respective .cif files) is provided below the refcodes.

| Form                    | Refcode           |                        | H-C    | H-N   | C-C    | C-N   | C-S   | N-S   | O-S   | $\Sigma$ |
|-------------------------|-------------------|------------------------|--------|-------|--------|-------|-------|-------|-------|----------|
| <i>P2<sub>1</sub>/c</i> | SLFNMA03<br>150 K | <i>k</i>               | 18     | 6     | 18     | 12    | 2     | 2     | 4     | 62       |
|                         |                   | <i>d<sub>min</sub></i> | 0.95   | 0.88  | 1.37   | 1.33  | 1.73  | 1.65  | 1.43  | 0.88     |
|                         |                   | <i>d<sub>max</sub></i> | 0.98   | 0.88  | 1.50   | 1.39  | 1.73  | 1.65  | 1.44  | 1.73     |
|                         |                   | <i>S</i>               | 109.72 | 39.41 | 121.47 | 90.00 | 10.26 | 9.70  | 24.24 | 404.80   |
|                         |                   | <i>V</i>               | 17.47  | 5.78  | 28.20  | 20.22 | 2.97  | 2.67  | 5.80  | 83.10    |
|                         |                   | $\Delta_S$             | 27.11  | 9.74  | 30.01  | 22.23 | 2.53  | 2.40  | 5.99  | 100.00   |
|                         |                   | $\Delta_V$             | 21.02  | 6.96  | 33.94  | 24.33 | 3.57  | 3.22  | 6.97  | 100.00   |
| <i>Pbca</i>             | SLFNMA01<br>295 K | <i>k</i>               | 18     | 6     | 18     | 12    | 2     | 2     | 4     | 62       |
|                         |                   | <i>d<sub>min</sub></i> | 0.87   | 0.80  | 1.36   | 1.32  | 1.75  | 1.64  | 1.43  | 0.80     |
|                         |                   | <i>d<sub>max</sub></i> | 1.05   | 0.89  | 1.52   | 1.38  | 1.75  | 1.64  | 1.44  | 1.75     |
|                         |                   | <i>S</i>               | 106.24 | 36.69 | 133.85 | 82.46 | 9.91  | 10.00 | 23.94 | 403.09   |
|                         |                   | <i>V</i>               | 17.08  | 5.08  | 31.05  | 18.49 | 2.89  | 2.74  | 5.73  | 83.05    |
|                         |                   | $\Delta_S$             | 26.36  | 9.10  | 33.21  | 20.46 | 2.46  | 2.48  | 5.94  | 100.00   |
|                         |                   | $\Delta_V$             | 20.57  | 6.12  | 37.38  | 22.26 | 3.48  | 3.30  | 6.89  | 100.00   |
| <i>Pna2<sub>1</sub></i> | SLFNMA04<br>150 K | <i>k</i>               | 18     | 6     | 18     | 12    | 2     | 2     | 4     | 62       |
|                         |                   | <i>d<sub>min</sub></i> | 0.95   | 0.80  | 1.37   | 1.33  | 1.73  | 1.66  | 1.43  | 0.80     |
|                         |                   | <i>d<sub>max</sub></i> | 0.98   | 0.89  | 1.50   | 1.40  | 1.74  | 1.66  | 1.44  | 1.74     |
|                         |                   | <i>S</i>               | 110.37 | 35.93 | 118.63 | 88.02 | 9.84  | 8.84  | 22.96 | 394.60   |
|                         |                   | <i>V</i>               | 17.57  | 5.08  | 27.61  | 19.80 | 2.85  | 2.44  | 5.49  | 80.84    |
|                         |                   | $\Delta_S$             | 27.97  | 9.11  | 30.06  | 22.31 | 2.49  | 2.24  | 5.82  | 100.00   |
|                         |                   | $\Delta_V$             | 21.74  | 6.28  | 34.16  | 24.49 | 3.52  | 3.02  | 6.79  | 100.00   |
| <i>a</i>                |                   | <i>k</i>               | 18     | 6     | 18     | 12    | 2     | 2     | 4     | 62       |
|                         |                   | <i>d<sub>min</sub></i> | 0.95   | 0.80  | 1.38   | 1.33  | 1.74  | 1.66  | 1.43  | 0.80     |
|                         |                   | <i>d<sub>max</sub></i> | 0.98   | 0.84  | 1.49   | 1.40  | 1.74  | 1.66  | 1.44  | 1.74     |
|                         |                   | <i>S</i>               | 109.53 | 35.61 | 113.48 | 85.70 | 9.97  | 8.93  | 23.12 | 386.34   |
|                         |                   | <i>V</i>               | 17.44  | 4.89  | 26.41  | 19.29 | 2.89  | 2.47  | 5.53  | 78.89    |
|                         |                   | $\Delta_S$             | 28.35  | 9.22  | 29.37  | 22.18 | 2.58  | 2.31  | 5.98  | 100.00   |
|                         |                   | $\Delta_V$             | 22.10  | 6.19  | 33.47  | 24.45 | 3.66  | 3.13  | 7.01  | 100.00   |
| <i>b</i>                |                   | <i>k</i>               | 18     | 6     | 18     | 12    | 2     | 2     | 4     | 62       |
|                         |                   | <i>d<sub>min</sub></i> | 0.95   | 0.86  | 1.37   | 1.33  | 1.73  | 1.66  | 1.43  | 0.86     |
|                         |                   | <i>d<sub>max</sub></i> | 0.98   | 0.89  | 1.50   | 1.38  | 1.73  | 1.66  | 1.44  | 1.73     |
|                         |                   | <i>S</i>               | 111.21 | 36.25 | 123.79 | 90.35 | 9.71  | 8.74  | 22.81 | 402.86   |
|                         |                   | <i>V</i>               | 17.71  | 5.27  | 28.82  | 20.31 | 2.81  | 2.41  | 5.46  | 82.78    |
|                         |                   | $\Delta_S$             | 27.61  | 9.00  | 30.73  | 22.43 | 2.41  | 2.17  | 5.66  | 100.00   |
|                         |                   | $\Delta_V$             | 21.39  | 6.37  | 34.81  | 24.53 | 3.39  | 2.91  | 6.59  | 100.00   |

Table S1.3. Characteristics of chemical bonds in sulfamethoxazole polymorphs (VD polyhedra faces with RF = 1). The temperature at which X-ray diffraction experiments were conducted (as stated in respective .cif files) is provided below the refcodes.

| Form | Refcode           |                        | H-C   | H-N   | C-C    | C-N   | C-O   | C-S   | N-O   | N-S  | O-S   | $\Sigma$ |
|------|-------------------|------------------------|-------|-------|--------|-------|-------|-------|-------|------|-------|----------|
| I    | SLFNMB01<br>295 K | <i>k</i>               | 16    | 6     | 18     | 6     | 2     | 2     | 2     | 2    | 4     | 58       |
|      |                   | <i>d<sub>min</sub></i> | 0.86  | 0.83  | 1.33   | 1.29  | 1.35  | 1.74  | 1.41  | 1.65 | 1.43  | 0.83     |
|      |                   | <i>d<sub>max</sub></i> | 0.97  | 0.86  | 1.47   | 1.40  | 1.35  | 1.74  | 1.41  | 1.65 | 1.44  | 1.74     |
|      |                   | <i>S</i>               | 88.81 | 33.44 | 108.14 | 33.18 | 12.29 | 10.38 | 13.67 | 8.21 | 24.18 | 332.30   |
|      |                   | <i>V</i>               | 13.38 | 4.72  | 24.94  | 7.50  | 2.77  | 3.01  | 3.22  | 2.25 | 5.78  | 67.56    |
|      |                   | $\Delta_S$             | 26.73 | 10.06 | 32.54  | 9.98  | 3.70  | 3.12  | 4.11  | 2.47 | 7.28  | 100.00   |
|      |                   | $\Delta_V$             | 19.80 | 6.98  | 36.91  | 11.10 | 4.10  | 4.46  | 4.76  | 3.34 | 8.55  | 100.00   |
| II   | SLFNMB02<br>295 K | <i>k</i>               | 16    | 6     | 18     | 6     | 2     | 2     | 2     | 2    | 4     | 58       |
|      |                   | <i>d<sub>min</sub></i> | 0.89  | 0.90  | 1.33   | 1.30  | 1.35  | 1.74  | 1.41  | 1.65 | 1.43  | 0.89     |
|      |                   | <i>d<sub>max</sub></i> | 0.99  | 1.00  | 1.48   | 1.39  | 1.35  | 1.74  | 1.41  | 1.65 | 1.44  | 1.74     |
|      |                   | <i>S</i>               | 91.51 | 35.57 | 118.61 | 38.30 | 11.71 | 10.63 | 14.53 | 9.22 | 24.69 | 354.76   |
|      |                   | <i>V</i>               | 14.58 | 5.52  | 27.39  | 8.64  | 2.62  | 3.09  | 3.43  | 2.53 | 5.91  | 73.71    |
|      |                   | $\Delta_S$             | 25.80 | 10.03 | 33.43  | 10.80 | 3.30  | 3.00  | 4.10  | 2.60 | 6.96  | 100.00   |
|      |                   | $\Delta_V$             | 19.78 | 7.49  | 37.16  | 11.72 | 3.56  | 4.19  | 4.65  | 3.43 | 8.02  | 100.00   |
| III  | SLFNMB05<br>153 K | <i>k</i>               | 16    | 6     | 18     | 6     | 2     | 2     | 2     | 2    | 4     | 58       |
|      |                   | <i>d<sub>min</sub></i> | 0.95  | 0.83  | 1.34   | 1.30  | 1.35  | 1.75  | 1.43  | 1.64 | 1.43  | 0.83     |
|      |                   | <i>d<sub>max</sub></i> | 0.98  | 0.99  | 1.50   | 1.40  | 1.35  | 1.75  | 1.43  | 1.64 | 1.44  | 1.75     |
|      |                   | <i>S</i>               | 96.29 | 33.67 | 115.98 | 36.51 | 11.60 | 10.84 | 15.17 | 9.41 | 25.30 | 354.74   |
|      |                   | <i>V</i>               | 15.34 | 5.12  | 27.05  | 8.25  | 2.61  | 3.15  | 3.60  | 2.56 | 6.06  | 73.74    |
|      |                   | $\Delta_S$             | 27.14 | 9.49  | 32.69  | 10.29 | 3.27  | 3.05  | 4.27  | 2.65 | 7.13  | 100.00   |
|      |                   | $\Delta_V$             | 20.80 | 6.94  | 36.68  | 11.19 | 3.54  | 4.27  | 4.89  | 3.48 | 8.21  | 100.00   |
| IV   | SLFNMB06<br>153 K | <i>k</i>               | 16    | 6     | 18     | 6     | 2     | 2     | 2     | 2    | 4     | 58       |
|      |                   | <i>d<sub>min</sub></i> | 0.95  | 0.81  | 1.34   | 1.30  | 1.35  | 1.74  | 1.41  | 1.64 | 1.43  | 0.81     |
|      |                   | <i>d<sub>max</sub></i> | 0.98  | 0.89  | 1.48   | 1.39  | 1.35  | 1.74  | 1.41  | 1.64 | 1.44  | 1.74     |
|      |                   | <i>S</i>               | 91.03 | 38.53 | 116.43 | 36.89 | 13.03 | 10.74 | 13.86 | 9.38 | 24.19 | 354.07   |
|      |                   | <i>V</i>               | 14.51 | 5.43  | 27.02  | 8.30  | 2.93  | 3.11  | 3.26  | 2.56 | 5.79  | 72.90    |
|      |                   | $\Delta_S$             | 25.71 | 10.88 | 32.88  | 10.42 | 3.68  | 3.03  | 3.91  | 2.65 | 6.83  | 100.00   |
|      |                   | $\Delta_V$             | 19.90 | 7.45  | 37.07  | 11.39 | 4.02  | 4.26  | 4.47  | 3.51 | 7.94  | 100.00   |



Table S1.4. Characteristics of chemical bonds in sulfathiazole polymorphs (VD polyhedra faces with RF = 1). The temperature at which X-ray diffraction experiments were conducted (as stated in respective .cif files) is provided below the refcodes.

| Form | Refcode           |                        | H-C   | H-N   | C-C    | C-N   | C-S   | N-S   | O-S   | $\Sigma$ |
|------|-------------------|------------------------|-------|-------|--------|-------|-------|-------|-------|----------|
| I    | SUTHAZ29<br>105 K | <i>k</i>               | 12    | 6     | 14     | 8     | 6     | 2     | 4     | 52       |
|      |                   | <i>d<sub>min</sub></i> | 1.08  | 1.02  | 1.35   | 1.33  | 1.74  | 1.61  | 1.44  | 1.02     |
|      |                   | <i>d<sub>max</sub></i> | 1.08  | 1.06  | 1.41   | 1.38  | 1.75  | 1.62  | 1.45  | 1.75     |
|      |                   | <i>S</i>               | 94.74 | 36.58 | 104.42 | 55.29 | 39.84 | 10.58 | 24.69 | 366.13   |
|      |                   | <i>V</i>               | 17.10 | 6.32  | 24.20  | 12.48 | 11.56 | 2.84  | 5.95  | 80.46    |
|      |                   | $\Delta_S$             | 25.88 | 9.99  | 28.52  | 15.10 | 10.88 | 2.89  | 6.74  | 100.00   |
|      |                   | $\Delta_V$             | 21.25 | 7.85  | 30.08  | 15.51 | 14.37 | 3.53  | 7.40  | 100.00   |
| Ia   |                   | <i>k</i>               | 12    | 6     | 14     | 8     | 6     | 2     | 4     | 52       |
|      |                   | <i>d<sub>min</sub></i> | 1.08  | 1.02  | 1.35   | 1.33  | 1.74  | 1.61  | 1.45  | 1.02     |
|      |                   | <i>d<sub>max</sub></i> | 1.08  | 1.06  | 1.41   | 1.38  | 1.75  | 1.61  | 1.45  | 1.75     |
|      |                   | <i>S</i>               | 94.21 | 36.62 | 96.29  | 54.26 | 39.24 | 10.74 | 24.61 | 355.96   |
|      |                   | <i>V</i>               | 17.00 | 6.33  | 22.32  | 12.26 | 11.39 | 2.88  | 5.94  | 78.10    |
|      |                   | $\Delta_S$             | 26.47 | 10.29 | 27.05  | 15.24 | 11.02 | 3.02  | 6.91  | 100.00   |
|      |                   | $\Delta_V$             | 21.77 | 8.10  | 28.57  | 15.69 | 14.58 | 3.68  | 7.60  | 100.00   |
| Ib   |                   | <i>k</i>               | 12    | 6     | 14     | 8     | 6     | 2     | 4     | 52       |
|      |                   | <i>d<sub>min</sub></i> | 1.08  | 1.02  | 1.35   | 1.33  | 1.74  | 1.62  | 1.44  | 1.02     |
|      |                   | <i>d<sub>max</sub></i> | 1.08  | 1.06  | 1.41   | 1.38  | 1.75  | 1.62  | 1.45  | 1.75     |
|      |                   | <i>S</i>               | 95.27 | 36.55 | 112.55 | 56.31 | 40.44 | 10.42 | 24.76 | 376.30   |
|      |                   | <i>V</i>               | 17.20 | 6.31  | 26.09  | 12.71 | 11.73 | 2.81  | 5.97  | 82.82    |
|      |                   | $\Delta_S$             | 25.32 | 9.71  | 29.91  | 14.96 | 10.75 | 2.77  | 6.58  | 100.00   |
|      |                   | $\Delta_V$             | 20.77 | 7.62  | 31.51  | 15.34 | 14.17 | 3.39  | 7.21  | 100.00   |
| II   | SUTHAZ31<br>100 K | <i>k</i>               | 12    | 6     | 14     | 8     | 6     | 2     | 4     | 52       |
|      |                   | <i>d<sub>min</sub></i> | 1.07  | 1.02  | 1.35   | 1.33  | 1.74  | 1.60  | 1.45  | 1.02     |
|      |                   | <i>d<sub>max</sub></i> | 1.10  | 1.06  | 1.41   | 1.41  | 1.76  | 1.60  | 1.45  | 1.76     |
|      |                   | <i>S</i>               | 91.98 | 32.50 | 97.86  | 51.78 | 38.26 | 10.46 | 23.32 | 346.16   |
|      |                   | <i>V</i>               | 16.62 | 5.61  | 22.66  | 11.74 | 11.15 | 2.78  | 5.64  | 76.21    |
|      |                   | $\Delta_S$             | 26.57 | 9.39  | 28.27  | 14.96 | 11.05 | 3.02  | 6.74  | 100.00   |
|      |                   | $\Delta_V$             | 21.81 | 7.36  | 29.74  | 15.40 | 14.64 | 3.65  | 7.40  | 100.00   |
| III  | SUTHAZ34<br>100 K | <i>k</i>               | 12    | 6     | 14     | 8     | 6     | 2     | 4     | 52       |
|      |                   | <i>d<sub>min</sub></i> | 1.08  | 1.02  | 1.35   | 1.33  | 1.74  | 1.59  | 1.44  | 1.02     |
|      |                   | <i>d<sub>max</sub></i> | 1.10  | 1.06  | 1.41   | 1.41  | 1.76  | 1.60  | 1.45  | 1.76     |
|      |                   | <i>S</i>               | 91.19 | 32.39 | 96.64  | 50.85 | 38.88 | 10.30 | 23.30 | 343.54   |
|      |                   | <i>V</i>               | 16.52 | 5.60  | 22.37  | 11.52 | 11.33 | 2.74  | 5.62  | 75.70    |
|      |                   | $\Delta_S$             | 26.55 | 9.43  | 28.13  | 14.80 | 11.32 | 3.00  | 6.78  | 100.00   |
|      |                   | $\Delta_V$             | 21.82 | 7.40  | 29.55  | 15.22 | 14.96 | 3.62  | 7.42  | 100.00   |
| IIIa |                   | <i>k</i>               | 12    | 6     | 14     | 8     | 6     | 2     | 4     | 52       |
|      |                   | <i>d<sub>min</sub></i> | 1.08  | 1.02  | 1.35   | 1.33  | 1.74  | 1.59  | 1.45  | 1.02     |
|      |                   | <i>d<sub>max</sub></i> | 1.10  | 1.06  | 1.41   | 1.41  | 1.76  | 1.59  | 1.45  | 1.76     |
|      |                   | <i>S</i>               | 90.86 | 32.23 | 95.76  | 50.19 | 38.21 | 10.39 | 23.35 | 341.00   |
|      |                   | <i>V</i>               | 16.46 | 5.59  | 22.17  | 11.37 | 11.14 | 2.76  | 5.64  | 75.12    |
|      |                   | $\Delta_S$             | 26.65 | 9.45  | 28.08  | 14.72 | 11.21 | 3.05  | 6.85  | 100.00   |
|      |                   | $\Delta_V$             | 21.91 | 7.44  | 29.51  | 15.13 | 14.83 | 3.67  | 7.50  | 100.00   |
| IIIb |                   | <i>k</i>               | 12    | 6     | 14     | 8     | 6     | 2     | 4     | 52       |
|      |                   | <i>d<sub>min</sub></i> | 1.08  | 1.02  | 1.35   | 1.33  | 1.74  | 1.60  | 1.44  | 1.02     |
|      |                   | <i>d<sub>max</sub></i> | 1.10  | 1.05  | 1.41   | 1.41  | 1.76  | 1.60  | 1.45  | 1.76     |
|      |                   | <i>S</i>               | 91.52 | 32.54 | 97.51  | 51.51 | 39.54 | 10.20 | 23.24 | 346.07   |
|      |                   | <i>V</i>               | 16.57 | 5.62  | 22.58  | 11.67 | 11.51 | 2.73  | 5.60  | 76.28    |
|      |                   | $\Delta_S$             | 26.45 | 9.40  | 28.18  | 14.88 | 11.43 | 2.95  | 6.72  | 100.00   |
|      |                   | $\Delta_V$             | 21.73 | 7.36  | 29.60  | 15.30 | 15.09 | 3.58  | 7.34  | 100.00   |

Table S1.4. (continued)

| Form | Refcode           |            | H-C   | H-N   | C-C   | C-N   | C-S   | N-S   | O-S   | $\Sigma$ |
|------|-------------------|------------|-------|-------|-------|-------|-------|-------|-------|----------|
| IV   | SUTHAZ37<br>100 K | $k$        | 12    | 6     | 14    | 8     | 6     | 2     | 4     | 52       |
|      |                   | $d_{min}$  | 1.08  | 1.01  | 1.35  | 1.33  | 1.74  | 1.61  | 1.44  | 1.01     |
|      |                   | $d_{max}$  | 1.09  | 1.05  | 1.41  | 1.41  | 1.77  | 1.61  | 1.45  | 1.77     |
|      |                   | $S$        | 91.48 | 31.86 | 96.75 | 51.33 | 39.02 | 10.20 | 23.17 | 343.81   |
|      |                   | $V$        | 16.55 | 5.49  | 22.41 | 11.64 | 11.38 | 2.73  | 5.59  | 75.78    |
|      |                   | $\Delta_S$ | 26.61 | 9.27  | 28.14 | 14.93 | 11.35 | 2.97  | 6.74  | 100.00   |
|      |                   | $\Delta_V$ | 21.84 | 7.24  | 29.58 | 15.36 | 15.01 | 3.60  | 7.38  | 100.00   |
| V    | SUTHAZ05<br>150 K | $k$        | 12    | 6     | 14    | 8     | 6     | 2     | 4     | 52       |
|      |                   | $d_{min}$  | 0.93  | 0.86  | 1.33  | 1.32  | 1.73  | 1.59  | 1.44  | 0.86     |
|      |                   | $d_{max}$  | 0.93  | 0.94  | 1.41  | 1.38  | 1.75  | 1.60  | 1.45  | 1.75     |
|      |                   | $S$        | 91.46 | 38.89 | 95.27 | 58.53 | 40.37 | 10.45 | 24.43 | 359.38   |
|      |                   | $V$        | 14.18 | 5.77  | 21.94 | 13.16 | 11.70 | 2.78  | 5.89  | 75.43    |
|      |                   | $\Delta_S$ | 25.45 | 10.82 | 26.51 | 16.29 | 11.23 | 2.91  | 6.80  | 100.00   |
|      |                   | $\Delta_V$ | 18.79 | 7.65  | 29.09 | 17.45 | 15.52 | 3.69  | 7.81  | 100.00   |
| Va   |                   | $k$        | 12    | 6     | 14    | 8     | 6     | 2     | 4     | 52       |
|      |                   | $d_{min}$  | 0.93  | 0.86  | 1.33  | 1.33  | 1.73  | 1.59  | 1.44  | 0.86     |
|      |                   | $d_{max}$  | 0.93  | 0.94  | 1.41  | 1.38  | 1.74  | 1.59  | 1.45  | 1.74     |
|      |                   | $S$        | 87.14 | 41.15 | 92.55 | 59.11 | 39.92 | 10.89 | 24.69 | 355.45   |
|      |                   | $V$        | 13.51 | 6.15  | 21.34 | 13.28 | 11.56 | 2.89  | 5.95  | 74.66    |
|      |                   | $\Delta_S$ | 24.52 | 11.58 | 26.04 | 16.63 | 11.23 | 3.06  | 6.95  | 100.00   |
|      |                   | $\Delta_V$ | 18.09 | 8.23  | 28.58 | 17.78 | 15.48 | 3.87  | 7.97  | 100.00   |
| Vb   |                   | $k$        | 12    | 6     | 14    | 8     | 6     | 2     | 4     | 52       |
|      |                   | $d_{min}$  | 0.93  | 0.86  | 1.33  | 1.32  | 1.74  | 1.60  | 1.45  | 0.86     |
|      |                   | $d_{max}$  | 0.93  | 0.91  | 1.41  | 1.38  | 1.75  | 1.60  | 1.45  | 1.75     |
|      |                   | $S$        | 95.78 | 36.62 | 97.98 | 57.95 | 40.82 | 10.02 | 24.16 | 363.32   |
|      |                   | $V$        | 14.85 | 5.39  | 22.55 | 13.04 | 11.85 | 2.68  | 5.84  | 76.19    |
|      |                   | $\Delta_S$ | 26.36 | 10.08 | 26.97 | 15.95 | 11.23 | 2.76  | 6.65  | 100.00   |
|      |                   | $\Delta_V$ | 19.48 | 7.07  | 29.60 | 17.12 | 15.56 | 3.51  | 7.66  | 100.00   |

Table S1.5. Characteristics of chemical bonds in chlorpropamide polymorphs (VD polyhedra faces with RF = 1). The temperature at which X-ray diffraction experiments were conducted (as stated in respective .cif files) is provided below the refcodes.

| Form       | Refcode           |                        | H-C    | H-N   | C-C    | C-N   | C-O   | C-S   | C-Cl  | N-S   | O-S   | $\Sigma$ |
|------------|-------------------|------------------------|--------|-------|--------|-------|-------|-------|-------|-------|-------|----------|
| $\alpha$   | BEDMIG10<br>295 K | <i>k</i>               | 22     | 4     | 16     | 6     | 2     | 2     | 2     | 2     | 4     | 60       |
|            |                   | <i>d<sub>min</sub></i> | 0.93   | 0.86  | 1.36   | 1.33  | 1.23  | 1.77  | 1.74  | 1.63  | 1.43  | 0.86     |
|            |                   | <i>d<sub>max</sub></i> | 0.97   | 0.86  | 1.52   | 1.46  | 1.23  | 1.77  | 1.74  | 1.63  | 1.43  | 1.77     |
|            |                   | <i>S</i>               | 104.61 | 26.46 | 104.11 | 31.16 | 15.13 | 10.07 | 15.24 | 9.95  | 24.86 | 341.59   |
|            |                   | <i>V</i>               | 16.49  | 3.79  | 24.05  | 7.19  | 3.09  | 2.97  | 4.43  | 2.70  | 5.91  | 70.62    |
|            |                   | $\Delta_S$             | 30.63  | 7.75  | 30.48  | 9.12  | 4.43  | 2.95  | 4.46  | 2.91  | 7.28  | 100.00   |
|            |                   | $\Delta_V$             | 23.35  | 5.37  | 34.05  | 10.18 | 4.38  | 4.20  | 6.27  | 3.82  | 8.37  | 100.00   |
| $\beta$    | BEDMIG01<br>295 K | <i>k</i>               | 22     | 4     | 16     | 6     | 2     | 2     | 2     | 2     | 4     | 60       |
|            |                   | <i>d<sub>min</sub></i> | 0.93   | 0.86  | 1.35   | 1.33  | 1.23  | 1.76  | 1.73  | 1.63  | 1.42  | 0.86     |
|            |                   | <i>d<sub>max</sub></i> | 0.97   | 0.86  | 1.54   | 1.45  | 1.23  | 1.76  | 1.73  | 1.63  | 1.43  | 1.76     |
|            |                   | <i>S</i>               | 102.39 | 27.61 | 105.17 | 34.03 | 15.78 | 10.32 | 14.05 | 9.82  | 25.02 | 344.18   |
|            |                   | <i>V</i>               | 16.14  | 3.96  | 24.18  | 7.79  | 3.23  | 3.02  | 4.06  | 2.67  | 5.94  | 70.98    |
|            |                   | $\Delta_S$             | 29.75  | 8.02  | 30.56  | 9.89  | 4.59  | 3.00  | 4.08  | 2.85  | 7.27  | 100.00   |
|            |                   | $\Delta_V$             | 22.73  | 5.57  | 34.06  | 10.98 | 4.55  | 4.25  | 5.72  | 3.76  | 8.37  | 100.00   |
| $\gamma$   | BEDMIG02<br>295 K | <i>k</i>               | 22     | 4     | 16     | 6     | 2     | 2     | 2     | 2     | 4     | 60       |
|            |                   | <i>d<sub>min</sub></i> | 0.93   | 0.86  | 1.35   | 1.32  | 1.25  | 1.76  | 1.74  | 1.64  | 1.43  | 0.86     |
|            |                   | <i>d<sub>max</sub></i> | 0.97   | 0.86  | 1.52   | 1.46  | 1.25  | 1.76  | 1.74  | 1.64  | 1.43  | 1.76     |
|            |                   | <i>S</i>               | 102.54 | 28.37 | 100.65 | 32.40 | 14.40 | 10.40 | 14.28 | 9.93  | 25.64 | 338.61   |
|            |                   | <i>V</i>               | 16.16  | 4.07  | 23.32  | 7.42  | 3.00  | 3.05  | 4.15  | 2.71  | 6.12  | 70.01    |
|            |                   | $\Delta_S$             | 30.28  | 8.38  | 29.73  | 9.57  | 4.25  | 3.07  | 4.22  | 2.93  | 7.57  | 100.00   |
|            |                   | $\Delta_V$             | 23.09  | 5.81  | 33.31  | 10.60 | 4.29  | 4.36  | 5.93  | 3.88  | 8.75  | 100.00   |
| $\delta$   | BEDMIG03<br>295 K | <i>k</i>               | 22     | 4     | 16     | 6     | 2     | 2     | 2     | 2     | 4     | 60       |
|            |                   | <i>d<sub>min</sub></i> | 0.93   | 0.86  | 1.36   | 1.33  | 1.22  | 1.77  | 1.74  | 1.63  | 1.41  | 0.86     |
|            |                   | <i>d<sub>max</sub></i> | 0.97   | 0.86  | 1.48   | 1.45  | 1.22  | 1.77  | 1.74  | 1.63  | 1.42  | 1.77     |
|            |                   | <i>S</i>               | 100.26 | 25.46 | 101.71 | 31.32 | 14.68 | 9.64  | 14.69 | 10.03 | 24.16 | 331.95   |
|            |                   | <i>V</i>               | 15.80  | 3.65  | 23.42  | 7.22  | 2.99  | 2.84  | 4.27  | 2.73  | 5.70  | 68.62    |
|            |                   | $\Delta_S$             | 30.20  | 7.67  | 30.64  | 9.44  | 4.42  | 2.90  | 4.43  | 3.02  | 7.28  | 100.00   |
|            |                   | $\Delta_V$             | 23.02  | 5.32  | 34.13  | 10.52 | 4.36  | 4.13  | 6.23  | 3.98  | 8.31  | 100.00   |
| $\epsilon$ | BEDMIG04<br>295 K | <i>k</i>               | 22     | 4     | 16     | 6     | 2     | 2     | 2     | 2     | 4     | 60       |
|            |                   | <i>d<sub>min</sub></i> | 0.93   | 0.86  | 1.35   | 1.30  | 1.24  | 1.76  | 1.74  | 1.63  | 1.43  | 0.86     |
|            |                   | <i>d<sub>max</sub></i> | 0.97   | 0.86  | 1.49   | 1.47  | 1.24  | 1.76  | 1.74  | 1.63  | 1.43  | 1.76     |
|            |                   | <i>S</i>               | 106.71 | 25.51 | 108.59 | 28.55 | 13.65 | 9.60  | 14.37 | 9.21  | 25.09 | 341.27   |
|            |                   | <i>V</i>               | 16.81  | 3.66  | 25.02  | 6.55  | 2.82  | 2.82  | 4.16  | 2.50  | 5.98  | 70.31    |
|            |                   | $\Delta_S$             | 31.27  | 7.48  | 31.82  | 8.36  | 4.00  | 2.81  | 4.21  | 2.70  | 7.35  | 100.00   |
|            |                   | $\Delta_V$             | 23.91  | 5.20  | 35.59  | 9.32  | 4.01  | 4.00  | 5.91  | 3.55  | 8.50  | 100.00   |

Table S1.6. Characteristics of chemical bonds in tolbutamide polymorphs (VD polyhedra faces with RF = 1). The temperature at which X-ray diffraction experiments were conducted (as stated in respective .cif files) is provided below the refcodes.

| Form | Refcode           |                        | H-C    | H-N   | C-C    | C-N   | C-O   | C-S   | N-S   | O-S   | $\Sigma$ |
|------|-------------------|------------------------|--------|-------|--------|-------|-------|-------|-------|-------|----------|
| I    | ZZZPUS20<br>100 K | <i>k</i>               | 32     | 4     | 20     | 6     | 2     | 2     | 2     | 4     | 72       |
|      |                   | <i>d<sub>min</sub></i> | 0.95   | 0.78  | 1.39   | 1.33  | 1.24  | 1.76  | 1.65  | 1.43  | 0.78     |
|      |                   | <i>d<sub>max</sub></i> | 0.99   | 0.79  | 1.53   | 1.46  | 1.24  | 1.76  | 1.65  | 1.44  | 1.76     |
|      |                   | <i>S</i>               | 135.88 | 24.19 | 109.69 | 27.60 | 13.17 | 9.58  | 8.97  | 24.20 | 353.28   |
|      |                   | <i>V</i>               | 21.98  | 3.17  | 25.92  | 6.39  | 2.72  | 2.81  | 2.47  | 5.79  | 71.23    |
|      |                   | $\Delta_S$             | 38.46  | 6.85  | 31.05  | 7.81  | 3.73  | 2.71  | 2.54  | 6.85  | 100.00   |
|      |                   | $\Delta_V$             | 30.85  | 4.45  | 36.38  | 8.97  | 3.82  | 3.94  | 3.46  | 8.12  | 100.00   |
| II   | ZZZPUS21<br>100 K | <i>k</i>               | 32     | 4     | 20     | 6     | 2     | 2     | 2     | 4     | 72       |
|      |                   | <i>d<sub>min</sub></i> | 0.95   | 0.88  | 1.37   | 1.32  | 1.23  | 1.75  | 1.64  | 1.42  | 0.88     |
|      |                   | <i>d<sub>max</sub></i> | 0.99   | 0.88  | 1.57   | 1.47  | 1.24  | 1.76  | 1.64  | 1.44  | 1.76     |
|      |                   | <i>S</i>               | 135.29 | 25.70 | 104.09 | 30.66 | 13.65 | 9.91  | 9.69  | 24.38 | 353.37   |
|      |                   | <i>V</i>               | 21.89  | 3.77  | 24.48  | 7.09  | 2.81  | 2.91  | 2.65  | 5.81  | 71.40    |
|      |                   | $\Delta_S$             | 38.29  | 7.27  | 29.46  | 8.68  | 3.86  | 2.80  | 2.74  | 6.90  | 100.00   |
|      |                   | $\Delta_V$             | 30.66  | 5.28  | 34.29  | 9.93  | 3.93  | 4.07  | 3.70  | 8.14  | 100.00   |
| IIa  |                   | <i>k</i>               | 32     | 4     | 20     | 6     | 2     | 2     | 2     | 4     | 72       |
|      |                   | <i>d<sub>min</sub></i> | 0.95   | 0.88  | 1.37   | 1.32  | 1.23  | 1.76  | 1.64  | 1.43  | 0.88     |
|      |                   | <i>d<sub>max</sub></i> | 0.99   | 0.88  | 1.53   | 1.47  | 1.23  | 1.76  | 1.64  | 1.43  | 1.76     |
|      |                   | <i>S</i>               | 135.33 | 24.17 | 106.65 | 29.45 | 13.50 | 9.84  | 9.45  | 24.87 | 353.27   |
|      |                   | <i>V</i>               | 21.90  | 3.55  | 25.04  | 6.81  | 2.78  | 2.89  | 2.58  | 5.93  | 71.47    |
|      |                   | $\Delta_S$             | 38.31  | 6.84  | 30.19  | 8.34  | 3.82  | 2.78  | 2.68  | 7.04  | 100.00   |
|      |                   | $\Delta_V$             | 30.64  | 4.96  | 35.03  | 9.52  | 3.88  | 4.05  | 3.61  | 8.30  | 100.00   |
| IIb  |                   | <i>k</i>               | 32     | 4     | 20     | 6     | 2     | 2     | 2     | 4     | 72       |
|      |                   | <i>d<sub>min</sub></i> | 0.95   | 0.88  | 1.37   | 1.33  | 1.24  | 1.75  | 1.64  | 1.42  | 0.88     |
|      |                   | <i>d<sub>max</sub></i> | 0.99   | 0.88  | 1.53   | 1.47  | 1.24  | 1.75  | 1.64  | 1.43  | 1.75     |
|      |                   | <i>S</i>               | 133.20 | 24.12 | 107.11 | 29.49 | 13.82 | 9.89  | 9.67  | 24.88 | 352.16   |
|      |                   | <i>V</i>               | 21.55  | 3.54  | 25.18  | 6.82  | 2.85  | 2.89  | 2.65  | 5.91  | 71.38    |
|      |                   | $\Delta_S$             | 37.82  | 6.85  | 30.41  | 8.37  | 3.92  | 2.81  | 2.75  | 7.06  | 100.00   |
|      |                   | $\Delta_V$             | 30.19  | 4.96  | 35.27  | 9.55  | 3.99  | 4.05  | 3.71  | 8.28  | 100.00   |
| IIc  |                   | <i>k</i>               | 32     | 4     | 20     | 6     | 2     | 2     | 2     | 4     | 72       |
|      |                   | <i>d<sub>min</sub></i> | 0.95   | 0.88  | 1.37   | 1.33  | 1.24  | 1.76  | 1.64  | 1.43  | 0.88     |
|      |                   | <i>d<sub>max</sub></i> | 0.99   | 0.88  | 1.53   | 1.46  | 1.24  | 1.76  | 1.64  | 1.43  | 1.76     |
|      |                   | <i>S</i>               | 133.89 | 27.27 | 102.63 | 31.49 | 13.25 | 9.99  | 9.52  | 23.28 | 351.33   |
|      |                   | <i>V</i>               | 21.66  | 4.00  | 24.15  | 7.28  | 2.73  | 2.94  | 2.60  | 5.54  | 70.89    |
|      |                   | $\Delta_S$             | 38.11  | 7.76  | 29.21  | 8.96  | 3.77  | 2.84  | 2.71  | 6.63  | 100.00   |
|      |                   | $\Delta_V$             | 30.55  | 5.65  | 34.06  | 10.26 | 3.85  | 4.14  | 3.67  | 7.81  | 100.00   |
| IId  |                   | <i>k</i>               | 32     | 4     | 20     | 6     | 2     | 2     | 2     | 4     | 72       |
|      |                   | <i>d<sub>min</sub></i> | 0.95   | 0.88  | 1.38   | 1.33  | 1.23  | 1.76  | 1.64  | 1.43  | 0.88     |
|      |                   | <i>d<sub>max</sub></i> | 0.99   | 0.88  | 1.57   | 1.46  | 1.23  | 1.76  | 1.64  | 1.44  | 1.76     |
|      |                   | <i>S</i>               | 138.74 | 27.22 | 99.98  | 32.21 | 14.04 | 9.93  | 10.10 | 24.49 | 356.71   |
|      |                   | <i>V</i>               | 22.44  | 3.99  | 23.57  | 7.44  | 2.88  | 2.91  | 2.75  | 5.86  | 71.84    |
|      |                   | $\Delta_S$             | 38.90  | 7.63  | 28.03  | 9.03  | 3.94  | 2.78  | 2.83  | 6.87  | 100.00   |
|      |                   | $\Delta_V$             | 31.23  | 5.55  | 32.80  | 10.36 | 4.01  | 4.05  | 3.83  | 8.15  | 100.00   |
| III  | ZZZPUS12<br>150 K | <i>k</i>               | 32     | 4     | 20     | 6     | 2     | 2     | 2     | 4     | 72       |
|      |                   | <i>d<sub>min</sub></i> | 0.95   | 0.88  | 1.37   | 1.32  | 1.23  | 1.76  | 1.63  | 1.43  | 0.88     |
|      |                   | <i>d<sub>max</sub></i> | 0.99   | 0.88  | 1.53   | 1.46  | 1.23  | 1.76  | 1.63  | 1.43  | 1.76     |
|      |                   | <i>S</i>               | 130.95 | 25.99 | 103.95 | 28.81 | 12.13 | 10.34 | 9.83  | 25.37 | 347.38   |
|      |                   | <i>V</i>               | 21.19  | 3.81  | 24.36  | 6.66  | 2.49  | 3.03  | 2.68  | 6.04  | 70.27    |
|      |                   | $\Delta_S$             | 37.70  | 7.48  | 29.92  | 8.29  | 3.49  | 2.98  | 2.83  | 7.30  | 100.00   |
|      |                   | $\Delta_V$             | 30.16  | 5.43  | 34.67  | 9.48  | 3.54  | 4.32  | 3.81  | 8.60  | 100.00   |

Table S1.6. (continued)

| Form | Refcode           |                        | H-C    | H-N   | C-C    | C-N   | C-O   | C-S   | N-S   | O-S   | $\Sigma$ |
|------|-------------------|------------------------|--------|-------|--------|-------|-------|-------|-------|-------|----------|
| IV   | ZZZPUS07<br>298 K | <i>k</i>               | 32     | 4     | 20     | 6     | 2     | 2     | 2     | 4     | 72       |
|      |                   | <i>d<sub>min</sub></i> | 0.93   | 0.83  | 1.38   | 1.32  | 1.25  | 1.76  | 1.64  | 1.43  | 0.83     |
|      |                   | <i>d<sub>max</sub></i> | 0.97   | 0.89  | 1.54   | 1.47  | 1.25  | 1.76  | 1.64  | 1.43  | 1.76     |
|      |                   | <i>S</i>               | 139.40 | 27.81 | 113.62 | 32.15 | 15.15 | 10.47 | 10.58 | 25.97 | 375.14   |
|      |                   | <i>V</i>               | 22.07  | 4.03  | 26.72  | 7.39  | 3.15  | 3.06  | 2.90  | 6.20  | 75.51    |
|      |                   | $\Delta_S$             | 37.16  | 7.41  | 30.29  | 8.57  | 4.04  | 2.79  | 2.82  | 6.92  | 100.00   |
|      |                   | $\Delta_V$             | 29.23  | 5.33  | 35.38  | 9.78  | 4.17  | 4.06  | 3.84  | 8.21  | 100.00   |
| V    | ZZZPUS10<br>298 K | <i>k</i>               | 32     | 4     | 20     | 6     | 2     | 2     | 2     | 4     | 72       |
|      |                   | <i>d<sub>min</sub></i> | 0.93   | 0.72  | 1.29   | 1.32  | 1.22  | 1.74  | 1.64  | 1.41  | 0.72     |
|      |                   | <i>d<sub>max</sub></i> | 0.97   | 0.76  | 1.54   | 1.44  | 1.22  | 1.74  | 1.64  | 1.42  | 1.74     |
|      |                   | <i>S</i>               | 133.74 | 25.85 | 117.22 | 32.46 | 15.33 | 10.54 | 8.76  | 25.21 | 369.10   |
|      |                   | <i>V</i>               | 21.17  | 3.16  | 27.02  | 7.38  | 3.13  | 3.06  | 2.39  | 5.95  | 73.27    |
|      |                   | $\Delta_S$             | 36.23  | 7.00  | 31.76  | 8.79  | 4.15  | 2.86  | 2.37  | 6.83  | 100.00   |
|      |                   | $\Delta_V$             | 28.90  | 4.32  | 36.88  | 10.08 | 4.27  | 4.17  | 3.26  | 8.12  | 100.00   |

Table S2.1. Characteristics of intramolecular noncovalent interactions in sulfapyridine polymorphs (VD polyhedra faces with RF > 1). The temperature at which X-ray diffraction experiments were conducted (as stated in respective .cif files) is provided below the refcodes.

| Form | Refcode           |                        | H···H | H···C | H···N | H···O | H···S | C···C | C···N | C···O | C···S | N···N | N···O | N···S | O···O | O···S | S···S | Σ      |
|------|-------------------|------------------------|-------|-------|-------|-------|-------|-------|-------|-------|-------|-------|-------|-------|-------|-------|-------|--------|
| II   | BEWKUJ11<br>295 K | <i>k</i>               | 20    | 32    | 12    | 6     | 6     | 18    | 8     | 8     |       |       | 4     |       | 2     |       |       | 116    |
|      |                   | <i>d<sub>min</sub></i> | 1.80  | 1.91  | 2.01  | 2.36  | 2.79  | 2.35  | 2.35  | 2.59  |       |       | 2.40  |       | 2.47  |       |       | 1.80   |
|      |                   | <i>d<sub>max</sub></i> | 2.81  | 3.32  | 3.02  | 2.74  | 2.86  | 4.03  | 3.23  | 3.05  |       |       | 2.56  |       | 2.47  |       |       | 4.03   |
|      |                   | <i>S</i>               | 51.14 | 16.49 | 8.99  | 18.57 | 1.83  | 3.55  | 4.02  | 3.01  |       |       | 3.43  |       | 2.56  |       |       | 113.58 |
|      |                   | <i>V</i>               | 20.24 | 6.26  | 3.93  | 7.76  | 0.86  | 1.88  | 1.81  | 1.33  |       |       | 1.41  |       | 1.05  |       |       | 46.54  |
|      |                   | $\Delta_S$             | 45.03 | 14.52 | 7.91  | 16.35 | 1.61  | 3.12  | 3.54  | 2.65  |       |       | 3.02  |       | 2.25  |       |       | 100.00 |
|      |                   | $\Delta_V$             | 43.49 | 13.46 | 8.44  | 16.67 | 1.85  | 4.04  | 3.90  | 2.87  |       |       | 3.04  |       | 2.26  |       |       | 100.00 |
| III  | BEWKUJ15<br>173 K | <i>k</i>               | 22    | 44    | 14    | 6     | 6     | 18    | 14    | 6     |       |       | 4     |       | 2     |       |       | 136    |
|      |                   | <i>d<sub>min</sub></i> | 1.49  | 1.89  | 2.01  | 2.20  | 2.68  | 2.37  | 2.35  | 2.59  |       |       | 2.44  |       | 2.46  |       |       | 1.49   |
|      |                   | <i>d<sub>max</sub></i> | 3.96  | 3.16  | 3.25  | 2.70  | 2.87  | 3.79  | 3.45  | 3.02  |       |       | 2.54  |       | 2.46  |       |       | 3.96   |
|      |                   | <i>S</i>               | 58.28 | 14.38 | 4.83  | 17.19 | 1.98  | 2.07  | 6.20  | 3.65  |       |       | 6.09  |       | 2.00  |       |       | 116.65 |
|      |                   | <i>V</i>               | 22.19 | 4.99  | 2.27  | 7.05  | 0.90  | 1.06  | 3.03  | 1.58  |       |       | 2.51  |       | 0.82  |       |       | 46.39  |
|      |                   | $\Delta_S$             | 49.96 | 12.32 | 4.14  | 14.74 | 1.69  | 1.78  | 5.32  | 3.13  |       |       | 5.22  |       | 1.71  |       |       | 100.00 |
|      |                   | $\Delta_V$             | 47.83 | 10.76 | 4.90  | 15.20 | 1.94  | 2.28  | 6.52  | 3.40  |       |       | 5.41  |       | 1.77  |       |       | 100.00 |
| IV   | BEWKUJ05<br>295 K | <i>k</i>               | 20    | 34    | 6     | 6     | 4     | 24    | 8     | 8     |       |       | 4     |       | 2     |       |       | 116    |
|      |                   | <i>d<sub>min</sub></i> | 1.47  | 1.92  | 2.41  | 2.49  | 2.76  | 2.35  | 2.38  | 2.57  |       |       | 2.40  |       | 2.45  |       |       | 1.47   |
|      |                   | <i>d<sub>max</sub></i> | 2.70  | 3.14  | 3.11  | 2.70  | 2.86  | 3.47  | 3.32  | 3.01  |       |       | 2.51  |       | 2.45  |       |       | 3.47   |
|      |                   | <i>S</i>               | 51.89 | 15.74 | 8.19  | 19.16 | 1.92  | 0.82  | 3.06  | 4.01  |       |       | 4.87  |       | 2.58  |       |       | 112.23 |
|      |                   | <i>V</i>               | 19.99 | 5.96  | 3.72  | 8.17  | 0.90  | 0.33  | 1.43  | 1.80  |       |       | 1.98  |       | 1.05  |       |       | 45.33  |
|      |                   | $\Delta_S$             | 46.23 | 14.02 | 7.29  | 17.07 | 1.71  | 0.73  | 2.72  | 3.58  |       |       | 4.34  |       | 2.30  |       |       | 100.00 |
|      |                   | $\Delta_V$             | 44.10 | 13.15 | 8.21  | 18.02 | 1.99  | 0.73  | 3.14  | 3.98  |       |       | 4.37  |       | 2.32  |       |       | 100.00 |
| V    | BEWKUJ13<br>295 K | <i>k</i>               | 20    | 38    | 12    | 6     | 6     | 20    | 8     | 7     | 1     | 1     | 4     |       | 2     |       |       | 125    |
|      |                   | <i>d<sub>min</sub></i> | 1.55  | 1.89  | 2.03  | 2.46  | 2.77  | 2.29  | 2.32  | 2.55  | 2.61  | 2.25  | 2.40  |       | 2.45  |       |       | 1.55   |
|      |                   | <i>d<sub>max</sub></i> | 2.76  | 3.14  | 3.27  | 2.69  | 2.97  | 4.01  | 3.38  | 3.08  | 2.61  | 2.25  | 2.53  |       | 2.45  |       |       | 4.01   |
|      |                   | <i>S</i>               | 61.57 | 17.94 | 6.47  | 20.89 | 1.92  | 2.96  | 2.98  | 4.44  | <0.01 | 0.25  | 4.55  |       | 1.98  |       |       | 125.94 |
|      |                   | <i>V</i>               | 23.89 | 6.65  | 2.88  | 9.03  | 0.90  | 1.42  | 1.35  | 1.94  | <0.01 | 0.10  | 1.87  |       | 0.81  |       |       | 50.84  |
|      |                   | $\Delta_S$             | 48.88 | 14.24 | 5.13  | 16.59 | 1.53  | 2.35  | 2.36  | 3.53  | <0.01 | 0.20  | 3.61  |       | 1.57  |       |       | 100.00 |
|      |                   | $\Delta_V$             | 46.99 | 13.09 | 5.67  | 17.77 | 1.77  | 2.78  | 2.66  | 3.82  | <0.01 | 0.19  | 3.68  |       | 1.59  |       |       | 100.00 |
| Va   |                   | <i>k</i>               | 20    | 36    | 12    | 6     | 6     | 18    | 10    | 6     | 2     | 2     | 4     |       | 2     |       |       | 124    |
|      |                   | <i>d<sub>min</sub></i> | 1.55  | 1.98  | 2.05  | 2.46  | 2.77  | 2.29  | 2.35  | 2.59  | 2.61  | 2.25  | 2.40  |       | 2.45  |       |       | 1.55   |
|      |                   | <i>d<sub>max</sub></i> | 2.76  | 3.14  | 3.27  | 2.69  | 2.97  | 3.58  | 3.38  | 3.04  | 2.61  | 2.25  | 2.53  |       | 2.45  |       |       | 3.58   |
|      |                   | <i>S</i>               | 63.52 | 17.44 | 5.93  | 21.36 | 1.93  | 2.59  | 2.59  | 5.14  | <0.01 | 0.51  | 4.80  |       | 1.95  |       |       | 127.76 |
|      |                   | <i>V</i>               | 24.75 | 6.46  | 2.58  | 9.23  | 0.90  | 1.20  | 1.18  | 2.26  | <0.01 | 0.19  | 1.98  |       | 0.80  |       |       | 51.53  |
|      |                   | $\Delta_S$             | 49.72 | 13.65 | 4.64  | 16.72 | 1.51  | 2.03  | 2.03  | 4.03  | <0.01 | 0.40  | 3.76  |       | 1.53  |       |       | 100.00 |
|      |                   | $\Delta_V$             | 48.03 | 12.54 | 5.01  | 17.90 | 1.75  | 2.33  | 2.30  | 4.39  | <0.01 | 0.37  | 3.84  |       | 1.55  |       |       | 100.00 |

Table S2.1. (continued)

| Form | Refcode           |                        | H···H | H···C | H···N | H···O | H···S | C···C | C···N | C···O | C···S | N···N | N···O | N···S | O···O | O···S | S···S | $\Sigma$ |
|------|-------------------|------------------------|-------|-------|-------|-------|-------|-------|-------|-------|-------|-------|-------|-------|-------|-------|-------|----------|
| Vb   |                   | <i>k</i>               | 20    | 40    | 12    | 6     | 6     | 22    | 6     | 8     |       |       | 4     |       | 2     |       |       | 126      |
|      |                   | <i>d<sub>min</sub></i> | 1.55  | 1.89  | 2.03  | 2.52  | 2.78  | 2.31  | 2.32  | 2.55  |       |       | 2.41  |       | 2.45  |       |       | 1.55     |
|      |                   | <i>d<sub>max</sub></i> | 2.61  | 2.95  | 3.23  | 2.69  | 2.85  | 4.01  | 3.32  | 3.08  |       |       | 2.50  |       | 2.45  |       |       | 4.01     |
|      |                   | <i>S</i>               | 59.61 | 18.45 | 7.00  | 20.42 | 1.92  | 3.32  | 3.36  | 3.74  |       |       | 4.30  |       | 2.01  |       |       | 124.12   |
|      |                   | <i>V</i>               | 23.02 | 6.84  | 3.18  | 8.84  | 0.89  | 1.63  | 1.52  | 1.63  |       |       | 1.77  |       | 0.82  |       |       | 50.14    |
|      |                   | $\Delta_S$             | 48.02 | 14.86 | 5.64  | 16.45 | 1.55  | 2.67  | 2.71  | 3.01  |       |       | 3.47  |       | 1.62  |       |       | 100.00   |
|      |                   | $\Delta_V$             | 45.92 | 13.65 | 6.35  | 17.63 | 1.78  | 3.24  | 3.03  | 3.24  |       |       | 3.52  |       | 1.63  |       |       | 100.00   |
| VI   | BEWKUJ14<br>120 K | <i>k</i>               | 21    | 42    | 8     | 7     | 6     | 20    | 5     | 8     | 2     |       | 4     |       | 2     |       |       | 125      |
|      |                   | <i>d<sub>min</sub></i> | 1.51  | 1.84  | 1.97  | 2.35  | 2.16  | 2.29  | 2.34  | 2.58  | 2.58  |       | 2.41  |       | 2.46  |       |       | 1.51     |
|      |                   | <i>d<sub>max</sub></i> | 4.13  | 3.99  | 3.05  | 2.95  | 2.90  | 3.74  | 2.74  | 3.13  | 2.70  |       | 2.53  |       | 2.48  |       |       | 4.13     |
|      |                   | <i>S</i>               | 67.53 | 20.36 | 8.37  | 22.83 | 2.24  | 3.43  | 2.31  | 3.99  | 0.03  |       | 4.21  |       | 2.19  |       |       | 137.49   |
|      |                   | <i>V</i>               | 26.40 | 7.92  | 3.46  | 9.84  | 1.01  | 1.77  | 1.04  | 1.83  | 0.01  |       | 1.73  |       | 0.90  |       |       | 55.90    |
|      |                   | $\Delta_S$             | 49.12 | 14.81 | 6.09  | 16.61 | 1.63  | 2.49  | 1.68  | 2.90  | 0.02  |       | 3.06  |       | 1.59  |       |       | 100.00   |
|      |                   | $\Delta_V$             | 47.22 | 14.17 | 6.18  | 17.60 | 1.80  | 3.17  | 1.85  | 3.27  | 0.02  |       | 3.10  |       | 1.61  |       |       | 100.00   |
| VIa  |                   | <i>k</i>               | 20    | 38    | 10    | 6     | 4     | 14    | 8     | 10    | 2     |       | 4     |       | 2     |       |       | 118      |
|      |                   | <i>d<sub>min</sub></i> | 1.51  | 1.88  | 2.01  | 2.51  | 2.82  | 2.35  | 2.34  | 2.58  | 2.58  |       | 2.41  |       | 2.46  |       |       | 1.51     |
|      |                   | <i>d<sub>max</sub></i> | 2.79  | 2.93  | 3.05  | 2.95  | 2.83  | 3.34  | 2.74  | 3.13  | 2.58  |       | 2.53  |       | 2.46  |       |       | 3.34     |
|      |                   | <i>S</i>               | 68.56 | 22.12 | 7.70  | 17.48 | 2.19  | 0.76  | 2.35  | 4.90  | <0.01 |       | 3.72  |       | 2.61  |       |       | 132.38   |
|      |                   | <i>V</i>               | 26.33 | 8.82  | 3.46  | 7.84  | 1.03  | 0.33  | 1.04  | 2.33  | <0.01 |       | 1.53  |       | 1.07  |       |       | 53.77    |
|      |                   | $\Delta_S$             | 51.79 | 16.71 | 5.82  | 13.20 | 1.66  | 0.57  | 1.77  | 3.70  | <0.01 |       | 2.81  |       | 1.97  |       |       | 100.00   |
|      |                   | $\Delta_V$             | 48.97 | 16.41 | 6.44  | 14.57 | 1.92  | 0.61  | 1.93  | 4.33  | <0.01 |       | 2.84  |       | 1.99  |       |       | 100.00   |
| VIb  |                   | <i>k</i>               | 22    | 46    | 6     | 8     | 8     | 26    | 2     | 6     | 2     |       | 4     |       | 2     |       |       | 132      |
|      |                   | <i>d<sub>min</sub></i> | 1.60  | 1.84  | 1.97  | 2.35  | 2.16  | 2.29  | 2.73  | 2.58  | 2.70  |       | 2.43  |       | 2.48  |       |       | 1.60     |
|      |                   | <i>d<sub>max</sub></i> | 4.13  | 3.99  | 2.69  | 2.69  | 2.90  | 3.74  | 2.73  | 3.00  | 2.70  |       | 2.49  |       | 2.48  |       |       | 4.13     |
|      |                   | <i>S</i>               | 66.51 | 18.61 | 9.03  | 28.19 | 2.29  | 6.10  | 2.28  | 3.08  | 0.05  |       | 4.70  |       | 1.77  |       |       | 142.61   |
|      |                   | <i>V</i>               | 26.47 | 7.02  | 3.45  | 11.84 | 0.98  | 3.21  | 1.04  | 1.33  | 0.02  |       | 1.94  |       | 0.73  |       |       | 58.03    |
|      |                   | $\Delta_S$             | 46.64 | 13.05 | 6.33  | 19.77 | 1.60  | 4.28  | 1.60  | 2.16  | 0.04  |       | 3.29  |       | 1.24  |       |       | 100.00   |
|      |                   | $\Delta_V$             | 45.60 | 12.10 | 5.95  | 20.41 | 1.69  | 5.54  | 1.78  | 2.29  | 0.04  |       | 3.35  |       | 1.26  |       |       | 100.00   |

Table S2.2. Characteristics of intramolecular noncovalent interactions in sulfamerazine polymorphs (VD polyhedra faces with RF > 1). The temperature at which X-ray diffraction experiments were conducted (as stated in respective .cif files) is provided below the refcodes.

| Form                    | Refcode           |                        | H···H | H···C | H···N | H···O | H···S | C···C | C···N | C···O | C···S | N···N | N···O | N···S | O···O | O···S | S···S | Σ |        |
|-------------------------|-------------------|------------------------|-------|-------|-------|-------|-------|-------|-------|-------|-------|-------|-------|-------|-------|-------|-------|---|--------|
| <i>P2<sub>1</sub>/c</i> | SLFNMA03<br>150 K | <i>k</i>               | 28    | 30    | 12    | 6     | 6     | 24    | 10    | 6     |       | 4     | 6     | 2     | 2     |       |       |   | 136    |
|                         |                   | <i>d<sub>min</sub></i> | 1.52  | 1.95  | 1.98  | 2.44  | 2.20  | 2.25  | 2.41  | 2.59  |       | 2.29  | 2.41  | 3.01  | 2.48  |       |       |   | 1.52   |
|                         |                   | <i>d<sub>max</sub></i> | 3.90  | 2.05  | 3.45  | 2.63  | 2.83  | 3.35  | 3.46  | 3.15  |       | 2.33  | 2.97  | 3.01  | 2.48  |       |       |   | 3.90   |
|                         |                   | <i>S</i>               | 78.32 | 23.04 | 23.00 | 18.23 | 0.91  | 3.13  | 6.26  | 2.51  |       | 1.06  | 7.42  | 0.67  | 3.53  |       |       |   | 168.07 |
|                         |                   | <i>V</i>               | 29.42 | 7.80  | 9.90  | 7.79  | 0.43  | 1.29  | 3.09  | 1.10  |       | 0.41  | 3.42  | 0.34  | 1.45  |       |       |   | 66.43  |
|                         |                   | $\Delta_S$             | 46.60 | 13.71 | 13.69 | 10.84 | 0.54  | 1.86  | 3.72  | 1.49  |       | 0.63  | 4.42  | 0.40  | 2.10  |       |       |   | 100.00 |
|                         |                   | $\Delta_V$             | 44.29 | 11.73 | 14.91 | 11.73 | 0.64  | 1.93  | 4.66  | 1.65  |       | 0.62  | 5.14  | 0.50  | 2.19  |       |       |   | 100.00 |
| <i>Pbca</i>             | SLFNMA01<br>295 K | <i>k</i>               | 26    | 40    | 14    | 6     | 6     | 18    | 8     | 10    |       | 2     | 6     | 2     | 2     |       |       |   | 140    |
|                         |                   | <i>d<sub>min</sub></i> | 1.38  | 1.88  | 1.96  | 2.44  | 2.19  | 2.25  | 2.43  | 2.59  |       | 2.35  | 2.41  | 3.06  | 2.47  |       |       |   | 1.38   |
|                         |                   | <i>d<sub>max</sub></i> | 3.55  | 2.85  | 3.37  | 2.67  | 2.82  | 3.47  | 3.55  | 3.15  |       | 2.35  | 2.98  | 3.06  | 2.47  |       |       |   | 3.55   |
|                         |                   | <i>S</i>               | 71.15 | 22.41 | 19.08 | 17.33 | 1.46  | 3.33  | 5.39  | 2.09  |       | 1.14  | 7.07  | 0.58  | 3.60  |       |       |   | 154.60 |
|                         |                   | <i>V</i>               | 24.77 | 7.57  | 8.24  | 7.30  | 0.64  | 1.35  | 2.81  | 0.91  |       | 0.44  | 3.25  | 0.30  | 1.48  |       |       |   | 59.06  |
|                         |                   | $\Delta_S$             | 46.02 | 14.49 | 12.34 | 11.21 | 0.94  | 2.15  | 3.49  | 1.35  |       | 0.74  | 4.57  | 0.38  | 2.33  |       |       |   | 100.00 |
|                         |                   | $\Delta_V$             | 41.95 | 12.82 | 13.94 | 12.37 | 1.09  | 2.29  | 4.75  | 1.54  |       | 0.75  | 5.50  | 0.50  | 2.51  |       |       |   | 100.00 |
| <i>Pna2<sub>1</sub></i> | SLFNMA04<br>150 K | <i>k</i>               | 28    | 39    | 13    | 6     | 6     | 19    | 8     | 5     |       | 4     | 6     | 2     | 2     |       |       |   | 138    |
|                         |                   | <i>d<sub>min</sub></i> | 1.44  | 1.87  | 1.98  | 2.36  | 2.12  | 2.26  | 2.41  | 2.59  |       | 2.28  | 2.41  | 3.00  | 2.47  |       |       |   | 1.44   |
|                         |                   | <i>d<sub>max</sub></i> | 3.88  | 3.65  | 2.92  | 2.65  | 2.84  | 3.31  | 3.30  | 2.98  |       | 2.34  | 3.01  | 3.01  | 2.47  |       |       |   | 3.88   |
|                         |                   | <i>S</i>               | 87.72 | 23.94 | 18.84 | 18.89 | 1.67  | 3.31  | 5.89  | 1.93  |       | 1.34  | 5.25  | 0.73  | 3.23  |       |       |   | 172.73 |
|                         |                   | <i>V</i>               | 33.43 | 8.16  | 7.97  | 8.08  | 0.68  | 1.41  | 2.95  | 0.84  |       | 0.52  | 2.40  | 0.37  | 1.33  |       |       |   | 68.13  |
|                         |                   | $\Delta_S$             | 50.78 | 13.86 | 10.91 | 10.94 | 0.97  | 1.92  | 3.41  | 1.12  |       | 0.77  | 3.04  | 0.42  | 1.87  |       |       |   | 100.00 |
|                         |                   | $\Delta_V$             | 49.07 | 11.98 | 11.69 | 11.86 | 1.00  | 2.07  | 4.33  | 1.23  |       | 0.76  | 3.53  | 0.54  | 1.95  |       |       |   | 100.00 |
| <i>a</i>                |                   | <i>k</i>               | 28    | 38    | 12    | 6     | 6     | 18    | 8     | 6     |       | 4     | 6     | 2     | 2     |       |       |   | 136    |
|                         |                   | <i>d<sub>min</sub></i> | 1.44  | 1.87  | 1.98  | 2.44  | 2.14  | 2.26  | 2.41  | 2.59  |       | 2.29  | 2.41  | 3.01  | 2.47  |       |       |   | 1.44   |
|                         |                   | <i>d<sub>max</sub></i> | 3.86  | 3.63  | 2.92  | 2.65  | 2.84  | 3.27  | 3.26  | 2.98  |       | 2.34  | 3.01  | 3.01  | 2.47  |       |       |   | 3.86   |
|                         |                   | <i>S</i>               | 89.46 | 23.60 | 18.22 | 19.71 | 1.51  | 3.40  | 6.08  | 2.23  |       | 1.22  | 4.84  | 0.74  | 3.56  |       |       |   | 174.56 |
|                         |                   | <i>V</i>               | 34.16 | 8.01  | 7.66  | 8.50  | 0.62  | 1.45  | 3.05  | 0.97  |       | 0.48  | 2.21  | 0.37  | 1.47  |       |       |   | 68.93  |
|                         |                   | $\Delta_S$             | 51.25 | 13.52 | 10.44 | 11.29 | 0.86  | 1.95  | 3.48  | 1.28  |       | 0.70  | 2.77  | 0.42  | 2.04  |       |       |   | 100.00 |
|                         |                   | $\Delta_V$             | 49.56 | 11.62 | 11.11 | 12.32 | 0.91  | 2.11  | 4.42  | 1.40  |       | 0.69  | 3.20  | 0.54  | 2.13  |       |       |   | 100.00 |
| <i>b</i>                |                   | <i>k</i>               | 28    | 40    | 14    | 6     | 6     | 20    | 8     | 4     |       | 4     | 6     | 2     | 2     |       |       |   | 140    |
|                         |                   | <i>d<sub>min</sub></i> | 1.44  | 1.95  | 1.98  | 2.36  | 2.12  | 2.26  | 2.42  | 2.59  |       | 2.28  | 2.42  | 3.00  | 2.47  |       |       |   | 1.44   |
|                         |                   | <i>d<sub>max</sub></i> | 3.88  | 3.65  | 2.85  | 2.62  | 2.84  | 3.31  | 3.30  | 2.60  |       | 2.33  | 3.00  | 3.00  | 2.47  |       |       |   | 3.88   |
|                         |                   | <i>S</i>               | 85.98 | 24.27 | 19.46 | 18.07 | 1.84  | 3.22  | 5.70  | 1.64  |       | 1.45  | 5.65  | 0.72  | 2.90  |       |       |   | 170.89 |
|                         |                   | <i>V</i>               | 32.70 | 8.31  | 8.28  | 7.67  | 0.74  | 1.37  | 2.85  | 0.71  |       | 0.56  | 2.60  | 0.36  | 1.19  |       |       |   | 67.33  |
|                         |                   | $\Delta_S$             | 50.31 | 14.20 | 11.39 | 10.58 | 1.08  | 1.88  | 3.33  | 0.96  |       | 0.85  | 3.30  | 0.42  | 1.70  |       |       |   | 100.00 |
|                         |                   | $\Delta_V$             | 48.57 | 12.34 | 12.29 | 11.39 | 1.10  | 2.04  | 4.23  | 1.05  |       | 0.83  | 3.86  | 0.54  | 1.77  |       |       |   | 100.00 |



Table S2.3. Characteristics of intramolecular noncovalent interactions in sulfamethoxazole polymorphs (VD polyhedra faces with RF > 1). The temperature at which X-ray diffraction experiments were conducted (as stated in respective .cif files) is provided below the refcodes.

| Form | Refcode           |                        | H···H | H···C | H···N | H···O | H···S | C···C | C···N | C···O | C···S | N···N | N···O | N···S | O···O | O···S | S···S | Σ      |
|------|-------------------|------------------------|-------|-------|-------|-------|-------|-------|-------|-------|-------|-------|-------|-------|-------|-------|-------|--------|
| I    | SLFNMB01<br>295 K | <i>k</i>               | 22    | 42    | 8     | 12    | 8     | 18    | 2     | 10    | 2     |       | 4     |       | 2     |       |       | 130    |
|      |                   | <i>d<sub>min</sub></i> | 1.38  | 1.84  | 2.30  | 2.51  | 2.09  | 2.17  | 2.73  | 2.14  | 2.65  |       | 2.43  |       | 2.47  |       |       | 1.38   |
|      |                   | <i>d<sub>max</sub></i> | 2.96  | 3.65  | 2.84  | 2.68  | 3.16  | 3.69  | 2.73  | 3.07  | 2.65  |       | 2.49  |       | 2.47  |       |       | 3.69   |
|      |                   | <i>S</i>               | 67.65 | 30.04 | 7.56  | 35.07 | 2.42  | 3.47  | 0.74  | 3.30  | 0.47  |       | 4.71  |       | 1.62  |       |       | 157.03 |
|      |                   | <i>V</i>               | 24.29 | 10.58 | 2.98  | 15.21 | 0.95  | 1.82  | 0.34  | 1.38  | 0.21  |       | 1.93  |       | 0.67  |       |       | 60.36  |
|      |                   | $\Delta_S$             | 43.08 | 19.13 | 4.81  | 22.33 | 1.54  | 2.21  | 0.47  | 2.10  | 0.30  |       | 3.00  |       | 1.03  |       |       | 100.00 |
|      |                   | $\Delta_V$             | 40.24 | 17.53 | 4.94  | 25.20 | 1.58  | 3.02  | 0.56  | 2.28  | 0.34  |       | 3.20  |       | 1.10  |       |       | 100.00 |
| II   | SLFNMB02<br>295 K | <i>k</i>               | 24    | 42    | 10    | 12    | 8     | 16    | 4     | 8     | 2     |       | 4     |       | 2     |       |       | 132    |
|      |                   | <i>d<sub>min</sub></i> | 1.48  | 1.97  | 2.44  | 2.48  | 2.20  | 2.18  | 2.73  | 2.16  | 2.66  |       | 2.42  |       | 2.49  |       |       | 1.48   |
|      |                   | <i>d<sub>max</sub></i> | 3.53  | 3.63  | 3.38  | 2.70  | 3.09  | 3.70  | 3.42  | 2.61  | 2.66  |       | 2.49  |       | 2.49  |       |       | 3.70   |
|      |                   | <i>S</i>               | 76.64 | 25.88 | 6.25  | 36.77 | 1.80  | 3.12  | 2.88  | 3.46  | 0.27  |       | 3.54  |       | 1.84  |       |       | 162.44 |
|      |                   | <i>V</i>               | 28.12 | 9.08  | 2.59  | 15.71 | 0.79  | 1.63  | 1.32  | 1.46  | 0.12  |       | 1.46  |       | 0.76  |       |       | 63.03  |
|      |                   | $\Delta_S$             | 47.18 | 15.93 | 3.85  | 22.64 | 1.11  | 1.92  | 1.77  | 2.13  | 0.17  |       | 2.18  |       | 1.13  |       |       | 100.00 |
|      |                   | $\Delta_V$             | 44.61 | 14.41 | 4.11  | 24.92 | 1.25  | 2.58  | 2.10  | 2.31  | 0.19  |       | 2.31  |       | 1.21  |       |       | 100.00 |
| III  | SLFNMB05<br>153 K | <i>k</i>               | 22    | 40    | 8     | 12    | 8     | 18    | 4     | 10    | 2     |       | 4     |       | 2     |       |       | 130    |
|      |                   | <i>d<sub>min</sub></i> | 1.51  | 1.87  | 2.43  | 2.52  | 2.28  | 2.19  | 2.72  | 2.17  | 2.67  |       | 2.41  |       | 2.49  |       |       | 1.51   |
|      |                   | <i>d<sub>max</sub></i> | 3.15  | 3.59  | 3.27  | 2.80  | 3.16  | 3.70  | 3.35  | 3.08  | 2.67  |       | 2.48  |       | 2.49  |       |       | 3.70   |
|      |                   | <i>S</i>               | 74.74 | 24.50 | 5.77  | 36.01 | 1.37  | 3.45  | 2.72  | 3.90  | 0.25  |       | 4.08  |       | 1.97  |       |       | 158.73 |
|      |                   | <i>V</i>               | 27.79 | 8.40  | 2.41  | 15.65 | 0.63  | 1.79  | 1.28  | 1.66  | 0.11  |       | 1.67  |       | 0.82  |       |       | 62.19  |
|      |                   | $\Delta_S$             | 47.08 | 15.43 | 3.63  | 22.68 | 0.86  | 2.17  | 1.71  | 2.45  | 0.15  |       | 2.57  |       | 1.24  |       |       | 100.00 |
|      |                   | $\Delta_V$             | 44.68 | 13.50 | 3.88  | 25.16 | 1.01  | 2.87  | 2.05  | 2.66  | 0.18  |       | 2.69  |       | 1.32  |       |       | 100.00 |
| IV   | SLFNMB06<br>153 K | <i>k</i>               | 22    | 38    | 8     | 12    | 8     | 14    | 4     | 12    | 2     |       | 4     |       | 2     |       |       | 126    |
|      |                   | <i>d<sub>min</sub></i> | 1.49  | 1.90  | 2.43  | 2.43  | 2.11  | 2.17  | 2.72  | 2.15  | 2.68  |       | 2.41  |       | 2.48  |       |       | 1.49   |
|      |                   | <i>d<sub>max</sub></i> | 3.15  | 3.50  | 3.26  | 2.75  | 3.12  | 3.68  | 3.36  | 3.06  | 2.68  |       | 2.49  |       | 2.48  |       |       | 3.68   |
|      |                   | <i>S</i>               | 65.83 | 24.59 | 5.82  | 33.17 | 1.93  | 1.53  | 2.52  | 3.86  | 0.10  |       | 2.43  |       | 1.35  |       |       | 143.14 |
|      |                   | <i>V</i>               | 24.37 | 8.41  | 2.42  | 14.33 | 0.85  | 0.72  | 1.15  | 1.62  | 0.04  |       | 1.00  |       | 0.56  |       |       | 55.47  |
|      |                   | $\Delta_S$             | 45.99 | 17.18 | 4.07  | 23.18 | 1.34  | 1.07  | 1.76  | 2.70  | 0.07  |       | 1.70  |       | 0.95  |       |       | 100.00 |
|      |                   | $\Delta_V$             | 43.93 | 15.16 | 4.36  | 25.84 | 1.52  | 1.30  | 2.07  | 2.93  | 0.08  |       | 1.80  |       | 1.01  |       |       | 100.00 |

Table S2.4. Characteristics of intramolecular noncovalent interactions in sulfathiazole polymorphs (VD polyhedra faces with RF > 1). The temperature at which X-ray diffraction experiments were conducted (as stated in respective .cif files) is provided below the refcodes.

| Form | Refcode           |                        | H···H | H···C | H···N | H···O | H···S | C···C | C···N | C···O | C···S | N···N | N···O | N···S | O···O | O···S | S···S | Σ      |
|------|-------------------|------------------------|-------|-------|-------|-------|-------|-------|-------|-------|-------|-------|-------|-------|-------|-------|-------|--------|
| I    | SUTHAZ29<br>105 K | <i>k</i>               | 14    | 27    | 9     | 4     | 8     | 18    | 6     | 9     | 6     | 1     | 4     |       | 2     | 2     | 2     | 112    |
|      |                   | <i>d<sub>min</sub></i> | 1.72  | 2.02  | 2.09  | 2.47  | 2.43  | 2.30  | 2.27  | 2.58  | 2.56  | 2.32  | 2.41  |       | 2.48  | 2.97  | 3.28  | 1.72   |
|      |                   | <i>d<sub>max</sub></i> | 2.75  | 2.59  | 3.38  | 2.69  | 3.32  | 3.44  | 3.42  | 2.99  | 3.79  | 2.32  | 2.53  |       | 2.48  | 2.99  | 3.29  | 3.79   |
|      |                   | <i>S</i>               | 39.00 | 8.91  | 4.86  | 14.91 | 12.17 | 2.54  | 4.10  | 5.30  | 2.10  | <0.01 | 3.44  |       | 1.22  | 6.44  | 0.27  | 105.24 |
|      |                   | <i>V</i>               | 15.46 | 3.14  | 2.14  | 6.39  | 6.14  | 1.26  | 1.86  | 2.41  | 1.22  | <0.01 | 1.42  |       | 0.50  | 3.19  | 0.15  | 45.27  |
|      |                   | $\Delta_S$             | 37.06 | 8.46  | 4.62  | 14.17 | 11.56 | 2.41  | 3.89  | 5.03  | 2.00  | <0.01 | 3.27  |       | 1.16  | 6.12  | 0.25  | 100.00 |
|      |                   | $\Delta_V$             | 34.15 | 6.93  | 4.73  | 14.12 | 13.56 | 2.78  | 4.12  | 5.32  | 2.69  | <0.01 | 3.13  |       | 1.11  | 7.04  | 0.32  | 100.00 |
| Ia   |                   | <i>k</i>               | 14    | 26    | 10    | 4     | 8     | 18    | 6     | 8     | 6     | 2     | 4     |       | 2     | 2     | 2     | 112    |
|      |                   | <i>d<sub>min</sub></i> | 1.72  | 2.02  | 2.09  | 2.47  | 2.49  | 2.30  | 2.28  | 2.58  | 2.56  | 2.32  | 2.41  |       | 2.48  | 2.99  | 3.29  | 1.72   |
|      |                   | <i>d<sub>max</sub></i> | 2.72  | 2.18  | 3.25  | 2.69  | 3.32  | 3.44  | 2.72  | 2.99  | 3.79  | 2.32  | 2.53  |       | 2.48  | 2.99  | 3.29  | 3.79   |
|      |                   | <i>S</i>               | 42.19 | 10.34 | 5.49  | 13.92 | 11.10 | 1.85  | 3.40  | 3.75  | 2.12  | <0.01 | 2.87  |       | 1.56  | 3.84  | 0.30  | 102.73 |
|      |                   | <i>V</i>               | 16.74 | 3.63  | 2.42  | 5.96  | 5.84  | 0.90  | 1.51  | 1.69  | 1.26  | <0.01 | 1.18  |       | 0.64  | 1.91  | 0.17  | 43.84  |
|      |                   | $\Delta_S$             | 41.07 | 10.07 | 5.35  | 13.55 | 10.80 | 1.80  | 3.31  | 3.65  | 2.06  | <0.01 | 2.79  |       | 1.52  | 3.74  | 0.29  | 100.00 |
|      |                   | $\Delta_V$             | 38.17 | 8.27  | 5.51  | 13.59 | 13.32 | 2.06  | 3.45  | 3.86  | 2.86  | <0.01 | 2.70  |       | 1.46  | 4.36  | 0.38  | 100.00 |
| Ib   |                   | <i>k</i>               | 14    | 28    | 8     | 4     | 8     | 18    | 6     | 10    | 6     |       | 4     |       | 2     | 2     | 2     | 112    |
|      |                   | <i>d<sub>min</sub></i> | 1.78  | 2.05  | 2.12  | 2.53  | 2.43  | 2.41  | 2.27  | 2.59  | 2.57  |       | 2.42  |       | 2.48  | 2.97  | 3.28  | 1.78   |
|      |                   | <i>d<sub>max</sub></i> | 2.75  | 2.59  | 3.38  | 2.69  | 3.09  | 3.37  | 3.42  | 2.98  | 3.72  |       | 2.52  |       | 2.48  | 2.97  | 3.28  | 3.72   |
|      |                   | <i>S</i>               | 35.82 | 7.47  | 4.23  | 15.90 | 13.23 | 3.23  | 4.79  | 6.85  | 2.09  |       | 4.01  |       | 0.87  | 9.03  | 0.23  | 107.75 |
|      |                   | <i>V</i>               | 14.19 | 2.65  | 1.87  | 6.83  | 6.44  | 1.61  | 2.22  | 3.12  | 1.18  |       | 1.65  |       | 0.36  | 4.47  | 0.13  | 46.70  |
|      |                   | $\Delta_S$             | 33.24 | 6.93  | 3.92  | 14.75 | 12.28 | 3.00  | 4.44  | 6.36  | 1.94  |       | 3.72  |       | 0.81  | 8.38  | 0.22  | 100.00 |
|      |                   | $\Delta_V$             | 30.38 | 5.67  | 4.00  | 14.62 | 13.78 | 3.45  | 4.74  | 6.68  | 2.52  |       | 3.53  |       | 0.77  | 9.57  | 0.27  | 100.00 |
| II   | SUTHAZ31<br>100 K | <i>k</i>               | 14    | 28    | 10    | 4     | 6     | 16    | 6     | 8     | 6     |       | 4     |       | 2     | 2     | 2     | 108    |
|      |                   | <i>d<sub>min</sub></i> | 1.65  | 2.02  | 2.13  | 2.53  | 2.48  | 2.41  | 2.28  | 2.60  | 2.53  |       | 2.43  |       | 2.46  | 2.91  | 3.27  | 1.65   |
|      |                   | <i>d<sub>max</sub></i> | 2.71  | 3.84  | 2.96  | 2.98  | 3.88  | 3.80  | 3.11  | 3.15  | 4.11  |       | 2.56  |       | 2.46  | 2.91  | 3.27  | 4.11   |
|      |                   | <i>S</i>               | 35.00 | 10.21 | 15.92 | 8.52  | 3.79  | 3.57  | 3.33  | 4.39  | 2.06  |       | 4.09  |       | 3.02  | 6.93  | 0.09  | 100.91 |
|      |                   | <i>V</i>               | 13.32 | 3.60  | 7.19  | 3.82  | 1.93  | 1.83  | 1.53  | 1.99  | 1.16  |       | 1.70  |       | 1.24  | 3.37  | 0.05  | 42.71  |
|      |                   | $\Delta_S$             | 34.69 | 10.12 | 15.78 | 8.44  | 3.76  | 3.54  | 3.30  | 4.35  | 2.04  |       | 4.05  |       | 2.99  | 6.87  | 0.09  | 100.00 |
|      |                   | $\Delta_V$             | 31.19 | 8.42  | 16.84 | 8.94  | 4.52  | 4.28  | 3.58  | 4.65  | 2.72  |       | 3.97  |       | 2.90  | 7.88  | 0.11  | 100.00 |
| III  | SUTHAZ34<br>100 K | <i>k</i>               | 16    | 27    | 9     | 4     | 6     | 16    | 6     | 8     | 6     | 1     | 4     |       | 2     | 2     | 2     | 109    |
|      |                   | <i>d<sub>min</sub></i> | 1.64  | 2.00  | 2.11  | 2.54  | 2.46  | 2.41  | 2.27  | 2.59  | 2.53  | 2.32  | 2.43  |       | 2.46  | 2.87  | 3.27  | 1.64   |
|      |                   | <i>d<sub>max</sub></i> | 4.15  | 3.81  | 2.91  | 3.02  | 3.98  | 3.84  | 3.12  | 3.17  | 4.13  | 2.32  | 2.55  |       | 2.47  | 2.93  | 3.28  | 4.15   |
|      |                   | <i>S</i>               | 33.08 | 10.36 | 12.79 | 8.72  | 4.14  | 3.53  | 2.96  | 4.50  | 2.10  | <0.01 | 4.11  |       | 3.29  | 6.89  | 0.07  | 96.53  |
|      |                   | <i>V</i>               | 12.81 | 3.67  | 5.73  | 3.95  | 2.03  | 1.79  | 1.33  | 2.04  | 1.20  | <0.01 | 1.70  |       | 1.35  | 3.33  | 0.04  | 40.98  |
|      |                   | $\Delta_S$             | 34.26 | 10.73 | 13.25 | 9.04  | 4.29  | 3.65  | 3.07  | 4.66  | 2.18  | <0.01 | 4.26  |       | 3.41  | 7.13  | 0.07  | 100.00 |
|      |                   | $\Delta_V$             | 31.26 | 8.96  | 13.97 | 9.64  | 4.96  | 4.37  | 3.25  | 4.98  | 2.94  | <0.01 | 4.16  |       | 3.30  | 8.12  | 0.09  | 100.00 |

Table S2.4. (continued)

| Form | Refcode           |                        | H···H | H···C | H···N | H···O | H···S | C···C | C···N | C···O | C···S | N···N | N···O | N···S | O···O | O···S | S···S | $\Sigma$ |
|------|-------------------|------------------------|-------|-------|-------|-------|-------|-------|-------|-------|-------|-------|-------|-------|-------|-------|-------|----------|
| IIIa |                   | <i>k</i>               | 16    | 30    | 10    | 4     | 6     | 16    | 6     | 8     | 6     | 2     | 4     |       | 2     | 2     | 2     | 114      |
|      |                   | <i>d<sub>min</sub></i> | 1.64  | 2.01  | 2.12  | 2.56  | 2.46  | 2.41  | 2.28  | 2.60  | 2.53  | 2.32  | 2.43  |       | 2.46  | 2.93  | 3.28  | 1.64     |
|      |                   | <i>d<sub>max</sub></i> | 3.95  | 3.71  | 2.87  | 3.02  | 3.98  | 3.76  | 3.10  | 3.17  | 4.13  | 2.32  | 2.55  |       | 2.46  | 2.93  | 3.28  | 4.13     |
|      |                   | <i>S</i>               | 32.11 | 9.50  | 15.80 | 7.80  | 3.82  | 3.62  | 2.69  | 4.63  | 2.23  | <0.01 | 4.17  |       | 2.93  | 6.85  | 0.07  | 96.22    |
|      |                   | <i>V</i>               | 12.70 | 3.39  | 7.06  | 3.53  | 1.82  | 1.85  | 1.21  | 2.09  | 1.28  | <0.01 | 1.73  |       | 1.20  | 3.34  | 0.04  | 41.24    |
|      |                   | $\Delta_S$             | 33.37 | 9.88  | 16.43 | 8.11  | 3.97  | 3.76  | 2.80  | 4.81  | 2.32  | <0.01 | 4.33  |       | 3.04  | 7.12  | 0.07  | 100.00   |
|      |                   | $\Delta_V$             | 30.79 | 8.23  | 17.12 | 8.57  | 4.40  | 4.48  | 2.93  | 5.07  | 3.11  | <0.01 | 4.20  |       | 2.91  | 8.10  | 0.09  | 100.00   |
| IIIb |                   | <i>k</i>               | 16    | 24    | 8     | 4     | 6     | 16    | 6     | 8     | 6     |       | 4     |       | 2     | 2     | 2     | 104      |
|      |                   | <i>d<sub>min</sub></i> | 1.69  | 2.00  | 2.11  | 2.54  | 2.48  | 2.41  | 2.27  | 2.59  | 2.54  |       | 2.43  |       | 2.47  | 2.87  | 3.27  | 1.69     |
|      |                   | <i>d<sub>max</sub></i> | 4.15  | 3.81  | 2.91  | 2.97  | 3.84  | 3.84  | 3.12  | 3.12  | 4.09  |       | 2.55  |       | 2.47  | 2.87  | 3.27  | 4.15     |
|      |                   | <i>S</i>               | 34.05 | 11.22 | 9.78  | 9.64  | 4.46  | 3.44  | 3.22  | 4.38  | 1.97  |       | 4.06  |       | 3.65  | 6.92  | 0.07  | 96.85    |
|      |                   | <i>V</i>               | 12.92 | 3.95  | 4.39  | 4.36  | 2.25  | 1.74  | 1.45  | 1.99  | 1.12  |       | 1.68  |       | 1.50  | 3.31  | 0.04  | 40.71    |
|      |                   | $\Delta_S$             | 35.15 | 11.58 | 10.10 | 9.96  | 4.60  | 3.55  | 3.33  | 4.52  | 2.03  |       | 4.19  |       | 3.77  | 7.15  | 0.07  | 100.00   |
|      |                   | $\Delta_V$             | 31.74 | 9.71  | 10.79 | 10.72 | 5.53  | 4.26  | 3.57  | 4.89  | 2.75  |       | 4.12  |       | 3.69  | 8.14  | 0.09  | 100.00   |
| IV   | SUTHAZ37<br>100 K | <i>k</i>               | 16    | 26    | 8     | 4     | 6     | 18    | 6     | 8     | 6     |       | 4     |       | 2     | 2     | 2     | 108      |
|      |                   | <i>d<sub>min</sub></i> | 1.66  | 2.01  | 2.11  | 2.55  | 2.46  | 2.41  | 2.28  | 2.60  | 2.54  |       | 2.44  |       | 2.47  | 2.89  | 3.28  | 1.66     |
|      |                   | <i>d<sub>max</sub></i> | 4.12  | 3.76  | 2.88  | 2.99  | 3.87  | 3.82  | 3.11  | 3.14  | 4.12  |       | 2.55  |       | 2.47  | 2.89  | 3.28  | 4.12     |
|      |                   | <i>S</i>               | 30.88 | 9.65  | 9.97  | 9.27  | 5.51  | 3.46  | 2.99  | 4.39  | 1.92  |       | 4.15  |       | 3.21  | 6.96  | 0.07  | 92.43    |
|      |                   | <i>V</i>               | 11.96 | 3.43  | 4.47  | 4.21  | 2.72  | 1.74  | 1.34  | 1.99  | 1.09  |       | 1.71  |       | 1.32  | 3.35  | 0.04  | 39.36    |
|      |                   | $\Delta_S$             | 33.41 | 10.44 | 10.79 | 10.02 | 5.96  | 3.74  | 3.24  | 4.75  | 2.08  |       | 4.49  |       | 3.47  | 7.53  | 0.07  | 100.00   |
|      |                   | $\Delta_V$             | 30.37 | 8.70  | 11.35 | 10.69 | 6.91  | 4.43  | 3.41  | 5.05  | 2.78  |       | 4.35  |       | 3.35  | 8.51  | 0.09  | 99.99    |
| V    | SUTHAZ05<br>150 K | <i>k</i>               | 15    | 26    | 8     | 6     | 7     | 13    | 6     | 8     | 4     |       | 4     |       | 2     | 2     | 1     | 102      |
|      |                   | <i>d<sub>min</sub></i> | 1.48  | 1.93  | 2.50  | 2.54  | 2.38  | 2.40  | 2.24  | 2.58  | 2.54  |       | 2.42  |       | 2.45  | 2.82  | 3.26  | 1.48     |
|      |                   | <i>d<sub>max</sub></i> | 4.32  | 2.56  | 2.84  | 3.76  | 4.04  | 3.83  | 3.12  | 3.20  | 4.17  |       | 2.54  |       | 2.46  | 2.91  | 3.26  | 4.32     |
|      |                   | <i>S</i>               | 42.52 | 11.47 | 14.33 | 10.46 | 5.16  | 2.19  | 2.57  | 6.83  | 1.33  |       | 3.34  |       | 2.30  | 9.37  | 0.10  | 111.97   |
|      |                   | <i>V</i>               | 15.69 | 3.82  | 6.38  | 4.78  | 2.43  | 1.02  | 1.11  | 3.08  | 0.75  |       | 1.38  |       | 0.94  | 4.48  | 0.06  | 45.91    |
|      |                   | $\Delta_S$             | 37.98 | 10.25 | 12.80 | 9.34  | 4.61  | 1.95  | 2.30  | 6.10  | 1.18  |       | 2.98  |       | 2.06  | 8.37  | 0.09  | 100.00   |
|      |                   | $\Delta_V$             | 34.18 | 8.31  | 13.89 | 10.40 | 5.30  | 2.23  | 2.42  | 6.71  | 1.62  |       | 3.01  |       | 2.05  | 9.75  | 0.12  | 100.00   |
| Va   |                   | <i>k</i>               | 14    | 26    | 8     | 6     | 6     | 14    | 6     | 8     | 2     |       | 4     |       | 2     | 2     |       | 98       |
|      |                   | <i>d<sub>min</sub></i> | 1.52  | 1.94  | 2.50  | 2.54  | 2.38  | 2.41  | 2.25  | 2.58  | 2.56  |       | 2.42  |       | 2.45  | 2.82  |       | 1.52     |
|      |                   | <i>d<sub>max</sub></i> | 2.51  | 2.04  | 2.78  | 3.69  | 2.85  | 3.51  | 3.06  | 2.90  | 2.56  |       | 2.54  |       | 2.45  | 2.82  |       | 3.69     |
|      |                   | <i>S</i>               | 40.99 | 9.54  | 11.86 | 7.81  | 4.45  | 1.54  | 2.68  | 7.05  | 0.30  |       | 3.14  |       | 3.03  | 9.55  |       | 101.92   |
|      |                   | <i>V</i>               | 15.14 | 3.20  | 5.28  | 3.60  | 1.86  | 0.66  | 1.16  | 3.16  | 0.13  |       | 1.30  |       | 1.24  | 4.48  |       | 41.20    |
|      |                   | $\Delta_S$             | 40.21 | 9.36  | 11.63 | 7.66  | 4.36  | 1.51  | 2.63  | 6.91  | 0.29  |       | 3.08  |       | 2.97  | 9.37  |       | 100.00   |
|      |                   | $\Delta_V$             | 36.75 | 7.76  | 12.81 | 8.74  | 4.50  | 1.59  | 2.83  | 7.68  | 0.31  |       | 3.15  |       | 3.00  | 10.88 |       | 100.00   |

Table S2.4. (continued)

| Form | Refcode    | H···H | H···C | H···N | H···O | H···S | C···C | C···N | C···O | C···S | N···N | N···O | N···S | O···O | O···S | S···S | $\Sigma$ |
|------|------------|-------|-------|-------|-------|-------|-------|-------|-------|-------|-------|-------|-------|-------|-------|-------|----------|
| $Vb$ | $k$        | 16    | 26    | 8     | 6     | 8     | 12    | 6     | 8     | 6     |       | 4     |       | 2     | 2     | 2     | 106      |
|      | $d_{min}$  | 1.48  | 1.93  | 2.50  | 2.55  | 2.38  | 2.40  | 2.24  | 2.59  | 2.54  |       | 2.42  |       | 2.46  | 2.91  | 3.26  | 1.48     |
|      | $d_{max}$  | 4.32  | 2.56  | 2.84  | 3.76  | 4.04  | 3.83  | 3.12  | 3.20  | 4.17  |       | 2.54  |       | 2.46  | 2.91  | 3.26  | 4.32     |
|      | $S$        | 44.06 | 13.41 | 16.80 | 13.11 | 5.88  | 2.83  | 2.46  | 6.61  | 2.35  |       | 3.53  |       | 1.58  | 9.20  | 0.21  | 122.01   |
|      | $V$        | 16.25 | 4.44  | 7.48  | 5.95  | 3.01  | 1.39  | 1.06  | 3.00  | 1.36  |       | 1.46  |       | 0.65  | 4.47  | 0.11  | 50.63    |
|      | $\Delta_S$ | 36.11 | 10.99 | 13.77 | 10.74 | 4.82  | 2.32  | 2.01  | 5.42  | 1.93  |       | 2.89  |       | 1.29  | 7.54  | 0.17  | 100.00   |
|      | $\Delta_V$ | 32.09 | 8.76  | 14.78 | 11.76 | 5.95  | 2.75  | 2.09  | 5.92  | 2.69  |       | 2.89  |       | 1.28  | 8.82  | 0.22  | 100.00   |

Table S2.5. Characteristics of intramolecular noncovalent interactions in chlorpropamide polymorphs (VD polyhedra faces with RF > 1). The temperature at which X-ray diffraction experiments were conducted (as stated in respective .cif files) is provided below the refcodes.

| Form | Refcode           |                        | H··H   | H··C  | H··N  | H··O  | H··S | H··Cl | C··C | C··N | C··O  | C··S  | C··Cl | N··N | N··O | N··S | N··Cl | O··O | O··S | O··Cl | S··S | S··Cl | Cl··Cl | Σ   |      |        |
|------|-------------------|------------------------|--------|-------|-------|-------|------|-------|------|------|-------|-------|-------|------|------|------|-------|------|------|-------|------|-------|--------|-----|------|--------|
| α    | BEDMIG10<br>295 K | <i>k</i>               | 40     | 50    | 12    | 12    | 6    | 4     | 12   | 4    | 6     |       |       |      | 8    |      |       | 4    | 2    |       |      |       |        | 160 |      |        |
|      |                   | <i>d<sub>min</sub></i> | 1.57   | 1.90  | 2.00  | 2.46  | 2.16 | 2.78  | 2.37 | 2.46 | 2.58  |       |       |      |      | 2.27 |       |      | 2.48 | 3.01  |      |       |        |     | 1.57 |        |
|      |                   | <i>d<sub>max</sub></i> | 3.66   | 3.79  | 3.39  | 3.40  | 2.81 | 2.79  | 3.65 | 2.71 | 2.98  |       |       |      |      | 2.50 |       |      | 2.84 | 3.01  |      |       |        |     |      | 3.79   |
|      |                   | <i>S</i>               | 85.97  | 20.84 | 9.30  | 31.90 | 1.51 | 15.36 | 0.82 | 4.22 | 2.94  |       |       |      |      | 2.91 |       |      | 5.65 | 0.25  |      |       |        |     |      | 181.64 |
|      |                   | <i>V</i>               | 30.17  | 7.46  | 3.58  | 14.02 | 0.65 | 7.12  | 0.40 | 1.90 | 1.27  |       |       |      |      | 1.18 |       |      | 2.50 | 0.13  |      |       |        |     |      | 70.37  |
|      |                   | $\Delta_S$             | 47.33  | 11.47 | 5.12  | 17.56 | 0.83 | 8.45  | 0.45 | 2.32 | 1.62  |       |       |      |      | 1.60 |       |      | 3.11 | 0.14  |      |       |        |     |      | 100.00 |
|      |                   | $\Delta_V$             | 42.87  | 10.61 | 5.08  | 19.92 | 0.93 | 10.12 | 0.57 | 2.70 | 1.80  |       |       |      |      | 1.67 |       |      | 3.55 | 0.18  |      |       |        |     |      | 100.00 |
| β    | BEDMIG01<br>295 K | <i>k</i>               | 40     | 50    | 14    | 12    | 6    | 4     | 16   | 6    | 14    |       |       |      | 8    |      |       | 4    | 2    |       |      |       |        | 176 |      |        |
|      |                   | <i>d<sub>min</sub></i> | 1.57   | 1.89  | 1.99  | 2.46  | 2.18 | 2.74  | 2.35 | 2.48 | 2.59  |       |       |      |      | 2.26 |       |      | 2.47 | 2.94  |      |       |        |     |      | 1.57   |
|      |                   | <i>d<sub>max</sub></i> | 3.44   | 5.09  | 3.30  | 3.18  | 2.82 | 2.79  | 4.01 | 3.37 | 3.29  |       |       |      |      | 2.51 |       |      | 2.92 | 2.94  |      |       |        |     |      | 5.09   |
|      |                   | <i>S</i>               | 96.49  | 21.96 | 10.67 | 36.00 | 0.87 | 10.31 | 2.79 | 3.19 | 8.24  |       |       |      |      | 4.12 |       |      | 5.64 | 0.76  |      |       |        |     |      | 201.03 |
|      |                   | <i>V</i>               | 34.00  | 7.94  | 4.32  | 16.29 | 0.39 | 4.76  | 1.42 | 1.45 | 4.12  |       |       |      |      | 1.69 |       |      | 2.55 | 0.37  |      |       |        |     |      | 79.32  |
|      |                   | $\Delta_S$             | 47.99  | 10.92 | 5.31  | 17.91 | 0.43 | 5.13  | 1.39 | 1.59 | 4.10  |       |       |      |      | 2.05 |       |      | 2.81 | 0.38  |      |       |        |     |      | 100.00 |
|      |                   | $\Delta_V$             | 42.87  | 10.01 | 5.45  | 20.54 | 0.49 | 6.00  | 1.79 | 1.83 | 5.20  |       |       |      |      | 2.13 |       |      | 3.22 | 0.47  |      |       |        |     |      | 100.00 |
| γ    | BEDMIG02<br>295 K | <i>k</i>               | 40     | 48    | 12    | 12    | 6    | 4     | 16   | 6    | 14    |       |       |      | 8    |      |       | 4    | 2    |       |      |       |        | 172 |      |        |
|      |                   | <i>d<sub>min</sub></i> | 1.57   | 1.89  | 2.00  | 2.47  | 2.17 | 2.76  | 2.37 | 2.47 | 2.59  |       |       |      |      | 2.27 |       |      | 2.49 | 3.00  |      |       |        |     |      | 1.57   |
|      |                   | <i>d<sub>max</sub></i> | 3.61   | 3.05  | 3.55  | 3.02  | 2.85 | 2.78  | 3.65 | 3.51 | 3.45  |       |       |      |      | 2.51 |       |      | 2.88 | 3.00  |      |       |        |     |      | 3.65   |
|      |                   | <i>S</i>               | 89.09  | 21.79 | 8.74  | 38.32 | 1.18 | 14.40 | 2.40 | 4.77 | 4.66  |       |       |      |      | 2.83 |       |      | 6.84 | 0.43  |      |       |        |     |      | 195.44 |
|      |                   | <i>V</i>               | 30.84  | 7.87  | 3.52  | 17.06 | 0.52 | 6.65  | 1.32 | 2.14 | 2.14  |       |       |      |      | 1.15 |       |      | 3.00 | 0.22  |      |       |        |     |      | 76.40  |
|      |                   | $\Delta_S$             | 45.58  | 11.15 | 4.47  | 19.61 | 0.60 | 7.37  | 1.23 | 2.44 | 2.38  |       |       |      |      | 1.45 |       |      | 3.50 | 0.22  |      |       |        |     |      | 100.00 |
|      |                   | $\Delta_V$             | 40.36  | 10.30 | 4.61  | 22.32 | 0.68 | 8.70  | 1.72 | 2.80 | 2.79  |       |       |      |      | 1.50 |       |      | 3.92 | 0.28  |      |       |        |     |      | 100.00 |
| δ    | BEDMIG03<br>295 K | <i>k</i>               | 42     | 56    | 16    | 14    | 6    | 4     | 18   | 6    | 6     |       |       |      | 6    |      |       | 4    | 2    |       |      |       |        | 180 |      |        |
|      |                   | <i>d<sub>min</sub></i> | 1.56   | 1.90  | 1.99  | 2.42  | 2.17 | 2.76  | 2.36 | 2.45 | 2.58  |       |       |      |      | 2.28 |       |      | 2.46 | 3.01  |      |       |        |     |      | 1.56   |
|      |                   | <i>d<sub>max</sub></i> | 3.90   | 3.86  | 3.32  | 3.75  | 2.81 | 2.79  | 3.61 | 3.39 | 3.01  |       |       |      |      | 2.50 |       |      | 2.81 | 3.01  |      |       |        |     |      | 3.90   |
|      |                   | <i>S</i>               | 94.51  | 23.15 | 9.07  | 32.51 | 1.41 | 14.08 | 0.86 | 4.37 | 2.32  |       |       |      |      | 3.36 |       |      | 4.99 | 0.19  |      |       |        |     |      | 190.80 |
|      |                   | <i>V</i>               | 32.43  | 8.73  | 3.55  | 14.23 | 0.60 | 6.51  | 0.40 | 1.96 | 1.00  |       |       |      |      | 1.36 |       |      | 2.24 | 0.09  |      |       |        |     |      | 73.10  |
|      |                   | $\Delta_S$             | 49.53  | 12.13 | 4.75  | 17.04 | 0.74 | 7.38  | 0.45 | 2.29 | 1.21  |       |       |      |      | 1.76 |       |      | 2.61 | 0.10  |      |       |        |     |      | 100.00 |
|      |                   | $\Delta_V$             | 44.37  | 11.95 | 4.85  | 19.46 | 0.82 | 8.90  | 0.54 | 2.68 | 1.37  |       |       |      |      | 1.86 |       |      | 3.07 | 0.13  |      |       |        |     |      | 100.00 |
| ε    | BEDMIG04<br>295 K | <i>k</i>               | 50     | 56    | 14    | 12    | 6    | 4     | 16   | 4    | 14    | 2     |       |      | 8    |      |       | 4    | 2    |       |      |       |        | 192 |      |        |
|      |                   | <i>d<sub>min</sub></i> | 1.57   | 1.87  | 2.01  | 2.48  | 2.18 | 2.77  | 2.37 | 2.48 | 2.60  | 2.65  |       |      |      | 2.27 |       |      | 2.47 | 2.93  |      |       |        |     |      | 1.57   |
|      |                   | <i>d<sub>max</sub></i> | 4.65   | 4.87  | 3.54  | 3.74  | 2.81 | 2.79  | 3.37 | 2.67 | 3.72  | 2.65  |       |      |      | 2.52 |       |      | 2.95 | 2.93  |      |       |        |     |      | 4.87   |
|      |                   | <i>S</i>               | 110.56 | 28.01 | 15.08 | 28.01 | 2.00 | 10.77 | 2.48 | 1.04 | 11.28 | <0.01 |       |      |      | 4.06 |       |      | 6.09 | 0.79  |      |       |        |     |      | 220.17 |
|      |                   | <i>V</i>               | 40.85  | 12.02 | 6.29  | 12.69 | 0.88 | 4.99  | 1.28 | 0.46 | 5.72  | <0.01 |       |      |      | 1.65 |       |      | 2.72 | 0.39  |      |       |        |     |      | 89.94  |
|      |                   | $\Delta_S$             | 50.22  | 12.72 | 6.85  | 12.72 | 0.91 | 4.89  | 1.13 | 0.47 | 5.12  | <0.01 |       |      |      | 1.84 |       |      | 2.77 | 0.36  |      |       |        |     |      | 100.00 |
|      |                   | $\Delta_V$             | 45.42  | 13.36 | 6.99  | 14.11 | 0.98 | 5.55  | 1.43 | 0.51 | 6.36  | <0.01 |       |      |      | 1.83 |       |      | 3.03 | 0.43  |      |       |        |     |      | 100.00 |

Table S2.6. Characteristics of intramolecular noncovalent interactions in tolbutamide polymorphs (VD polyhedra faces with RF > 1). The temperature at which X-ray diffraction experiments were conducted (as stated in respective .cif files) is provided below the refcodes.

| Form | Refcode           |                        | H···H  | H···C | H···N | H···O | H···S | C···C | C···N | C···O | C···S | N···N | N···O | N···S | O···O | O···S | S···S | Σ |        |
|------|-------------------|------------------------|--------|-------|-------|-------|-------|-------|-------|-------|-------|-------|-------|-------|-------|-------|-------|---|--------|
| I    | ZZZPUS20<br>100 K | <i>k</i>               | 82     | 84    | 14    | 12    | 6     | 20    | 4     | 12    | 2     |       | 8     |       | 4     | 2     |       |   | 250    |
|      |                   | <i>d<sub>min</sub></i> | 1.60   | 1.83  | 2.02  | 2.45  | 2.10  | 2.40  | 2.48  | 2.59  | 2.64  |       | 2.28  |       | 2.47  | 2.95  |       |   | 1.60   |
|      |                   | <i>d<sub>max</sub></i> | 4.61   | 4.28  | 3.24  | 3.69  | 2.84  | 3.24  | 2.70  | 3.84  | 2.64  |       | 2.54  |       | 2.96  | 2.95  |       |   | 4.61   |
|      |                   | <i>S</i>               | 157.04 | 41.38 | 9.29  | 21.49 | 2.14  | 2.82  | 0.83  | 8.58  | 0.06  |       | 2.74  |       | 4.56  | 0.77  |       |   | 251.68 |
|      |                   | <i>V</i>               | 57.60  | 16.81 | 3.64  | 9.50  | 0.92  | 1.39  | 0.37  | 4.18  | 0.03  |       | 1.12  |       | 2.03  | 0.38  |       |   | 97.94  |
|      |                   | $\Delta_S$             | 62.39  | 16.44 | 3.69  | 8.54  | 0.85  | 1.12  | 0.33  | 3.41  | 0.02  |       | 1.09  |       | 1.81  | 0.30  |       |   | 100.00 |
|      |                   | $\Delta_V$             | 58.81  | 17.16 | 3.71  | 9.70  | 0.94  | 1.42  | 0.37  | 4.27  | 0.03  |       | 1.14  |       | 2.08  | 0.38  |       |   | 100.00 |
| II   | ZZZPUS21<br>100 K | <i>k</i>               | 67     | 75    | 13    | 13    | 6     | 17    | 5     | 12    |       |       | 7     |       | 4     | 2     |       |   | 221    |
|      |                   | <i>d<sub>min</sub></i> | 1.60   | 1.91  | 2.02  | 2.46  | 2.18  | 2.37  | 2.47  | 2.58  |       |       | 2.27  |       | 2.46  | 2.95  |       |   | 1.60   |
|      |                   | <i>d<sub>max</sub></i> | 3.97   | 3.73  | 3.55  | 4.10  | 2.86  | 3.81  | 3.45  | 4.08  |       |       | 2.53  |       | 2.93  | 3.01  |       |   | 4.10   |
|      |                   | <i>S</i>               | 147.10 | 29.39 | 9.81  | 26.52 | 1.50  | 1.15  | 3.19  | 5.71  |       |       | 3.05  |       | 5.40  | 0.54  |       |   | 233.36 |
|      |                   | <i>V</i>               | 52.68  | 10.49 | 4.04  | 11.77 | 0.67  | 0.53  | 1.44  | 2.76  |       |       | 1.24  |       | 2.43  | 0.27  |       |   | 88.31  |
|      |                   | $\Delta_S$             | 63.04  | 12.59 | 4.20  | 11.36 | 0.64  | 0.49  | 1.37  | 2.45  |       |       | 1.31  |       | 2.31  | 0.23  |       |   | 100.00 |
|      |                   | $\Delta_V$             | 59.65  | 11.88 | 4.57  | 13.33 | 0.76  | 0.59  | 1.63  | 3.13  |       |       | 1.40  |       | 2.75  | 0.31  |       |   | 100.00 |
| IIa  |                   | <i>k</i>               | 66     | 72    | 12    | 12    | 6     | 16    | 6     | 14    |       |       | 6     |       | 4     | 2     |       |   | 216    |
|      |                   | <i>d<sub>min</sub></i> | 1.60   | 1.91  | 2.02  | 2.46  | 2.19  | 2.37  | 2.49  | 2.58  |       |       | 2.27  |       | 2.48  | 2.95  |       |   | 1.60   |
|      |                   | <i>d<sub>max</sub></i> | 3.11   | 3.65  | 2.88  | 3.26  | 2.86  | 3.81  | 3.15  | 3.93  |       |       | 2.53  |       | 2.93  | 2.95  |       |   | 3.93   |
|      |                   | <i>S</i>               | 147.68 | 29.40 | 11.91 | 23.38 | 1.52  | 1.08  | 1.91  | 9.27  |       |       | 2.95  |       | 4.30  | 0.76  |       |   | 234.16 |
|      |                   | <i>V</i>               | 52.70  | 10.59 | 4.94  | 10.36 | 0.70  | 0.45  | 0.86  | 4.51  |       |       | 1.19  |       | 1.96  | 0.38  |       |   | 88.63  |
|      |                   | $\Delta_S$             | 63.07  | 12.56 | 5.09  | 9.98  | 0.65  | 0.46  | 0.82  | 3.96  |       |       | 1.26  |       | 1.84  | 0.33  |       |   | 100.00 |
|      |                   | $\Delta_V$             | 59.46  | 11.95 | 5.57  | 11.69 | 0.79  | 0.51  | 0.97  | 5.08  |       |       | 1.34  |       | 2.21  | 0.42  |       |   | 100.00 |
| IIb  |                   | <i>k</i>               | 68     | 70    | 14    | 14    | 6     | 20    | 4     | 12    |       |       | 6     |       | 4     | 2     |       |   | 220    |
|      |                   | <i>d<sub>min</sub></i> | 1.60   | 1.92  | 2.02  | 2.46  | 2.20  | 2.38  | 2.48  | 2.59  |       |       | 2.29  |       | 2.46  | 2.99  |       |   | 1.60   |
|      |                   | <i>d<sub>max</sub></i> | 3.97   | 3.47  | 2.81  | 4.10  | 2.86  | 3.70  | 2.71  | 4.08  |       |       | 2.52  |       | 2.91  | 2.99  |       |   | 4.10   |
|      |                   | <i>S</i>               | 152.62 | 29.85 | 11.93 | 23.50 | 1.55  | 1.50  | 1.61  | 8.05  |       |       | 2.84  |       | 6.40  | 0.74  |       |   | 240.60 |
|      |                   | <i>V</i>               | 55.22  | 10.65 | 4.98  | 10.52 | 0.73  | 0.72  | 0.72  | 4.09  |       |       | 1.16  |       | 2.90  | 0.37  |       |   | 92.05  |
|      |                   | $\Delta_S$             | 63.43  | 12.41 | 4.96  | 9.77  | 0.65  | 0.62  | 0.67  | 3.34  |       |       | 1.18  |       | 2.66  | 0.31  |       |   | 100.00 |
|      |                   | $\Delta_V$             | 59.99  | 11.57 | 5.40  | 11.43 | 0.79  | 0.78  | 0.78  | 4.44  |       |       | 1.26  |       | 3.15  | 0.40  |       |   | 100.00 |
| IIc  |                   | <i>k</i>               | 66     | 82    | 12    | 12    | 6     | 12    | 6     | 10    |       |       | 8     |       | 4     | 2     |       |   | 220    |
|      |                   | <i>d<sub>min</sub></i> | 1.60   | 1.92  | 2.02  | 2.47  | 2.19  | 2.37  | 2.48  | 2.59  |       |       | 2.27  |       | 2.48  | 3.01  |       |   | 1.60   |
|      |                   | <i>d<sub>max</sub></i> | 3.59   | 3.73  | 3.43  | 2.90  | 2.84  | 3.76  | 3.45  | 3.01  |       |       | 2.50  |       | 2.80  | 3.01  |       |   | 3.76   |
|      |                   | <i>S</i>               | 139.04 | 28.91 | 7.50  | 29.92 | 1.59  | 0.87  | 4.43  | 2.71  |       |       | 3.22  |       | 5.13  | 0.23  |       |   | 223.53 |
|      |                   | <i>V</i>               | 49.48  | 10.37 | 3.09  | 13.25 | 0.69  | 0.37  | 2.00  | 1.19  |       |       | 1.31  |       | 2.30  | 0.12  |       |   | 84.14  |
|      |                   | $\Delta_S$             | 62.20  | 12.93 | 3.35  | 13.38 | 0.71  | 0.39  | 1.98  | 1.21  |       |       | 1.44  |       | 2.29  | 0.10  |       |   | 100.00 |
|      |                   | $\Delta_V$             | 58.80  | 12.32 | 3.67  | 15.74 | 0.82  | 0.44  | 2.38  | 1.41  |       |       | 1.55  |       | 2.73  | 0.14  |       |   | 100.00 |

Table S2.6. (continued)

| Form        | Refcode           |                        | H···H  | H···C | H···N | H···O | H···S | C···C | C···N | C···O | C···S | N···N | N···O | N···S | O···O | O···S | S···S | $\Sigma$ |
|-------------|-------------------|------------------------|--------|-------|-------|-------|-------|-------|-------|-------|-------|-------|-------|-------|-------|-------|-------|----------|
| II <i>d</i> |                   | <i>k</i>               | 66     | 76    | 14    | 12    | 6     | 18    | 4     | 12    |       |       | 6     |       | 4     | 2     |       | 220      |
|             |                   | <i>d<sub>min</sub></i> | 1.60   | 1.92  | 2.02  | 2.46  | 2.18  | 2.39  | 2.47  | 2.59  |       |       | 2.29  |       | 2.49  | 3.00  |       | 1.60     |
|             |                   | <i>d<sub>max</sub></i> | 3.57   | 3.07  | 3.55  | 3.20  | 2.86  | 3.77  | 2.72  | 3.52  |       |       | 2.51  |       | 2.86  | 3.00  |       | 3.77     |
|             |                   | <i>S</i>               | 149.06 | 29.39 | 7.90  | 29.26 | 1.32  | 1.14  | 4.82  | 2.83  |       |       | 3.20  |       | 5.78  | 0.45  |       | 235.12   |
|             |                   | <i>V</i>               | 53.32  | 10.34 | 3.14  | 12.95 | 0.58  | 0.56  | 2.18  | 1.27  |       |       | 1.30  |       | 2.56  | 0.22  |       | 88.42    |
|             |                   | $\Delta_S$             | 63.40  | 12.50 | 3.36  | 12.44 | 0.56  | 0.48  | 2.05  | 1.20  |       |       | 1.36  |       | 2.46  | 0.19  |       | 100.00   |
|             |                   | $\Delta_V$             | 60.31  | 11.69 | 3.55  | 14.64 | 0.65  | 0.64  | 2.46  | 1.44  |       |       | 1.47  |       | 2.89  | 0.25  |       | 100.00   |
| III         | ZZZPUS12<br>150 K | <i>k</i>               | 74     | 80    | 12    | 14    | 6     | 14    | 6     | 6     |       |       | 6     |       | 4     | 2     |       | 224      |
|             |                   | <i>d<sub>min</sub></i> | 1.60   | 1.91  | 2.02  | 2.48  | 2.18  | 2.37  | 2.48  | 2.59  |       |       | 2.30  |       | 2.47  | 3.02  |       | 1.60     |
|             |                   | <i>d<sub>max</sub></i> | 4.19   | 3.59  | 3.05  | 3.28  | 2.86  | 2.76  | 3.24  | 3.19  |       |       | 2.50  |       | 2.84  | 3.02  |       | 4.19     |
|             |                   | <i>S</i>               | 171.77 | 34.20 | 10.51 | 36.64 | 1.83  | 0.95  | 3.06  | 4.55  |       |       | 2.53  |       | 4.09  | 0.15  |       | 270.27   |
|             |                   | <i>V</i>               | 63.40  | 12.61 | 4.26  | 15.96 | 0.82  | 0.38  | 1.38  | 1.97  |       |       | 1.02  |       | 1.85  | 0.07  |       | 103.72   |
|             |                   | $\Delta_S$             | 63.55  | 12.65 | 3.89  | 13.56 | 0.68  | 0.35  | 1.13  | 1.68  |       |       | 0.93  |       | 1.51  | 0.05  |       | 100.00   |
|             |                   | $\Delta_V$             | 61.13  | 12.16 | 4.11  | 15.38 | 0.79  | 0.37  | 1.33  | 1.90  |       |       | 0.99  |       | 1.78  | 0.07  |       | 100.00   |
| IV          | ZZZPUS07<br>298 K | <i>k</i>               | 68     | 80    | 16    | 12    | 6     | 16    | 6     | 8     |       |       | 8     |       | 4     | 2     |       | 226      |
|             |                   | <i>d<sub>min</sub></i> | 1.57   | 1.86  | 2.01  | 2.46  | 2.21  | 2.38  | 2.49  | 2.59  |       |       | 2.27  |       | 2.48  | 3.06  |       | 1.57     |
|             |                   | <i>d<sub>max</sub></i> | 4.39   | 4.56  | 3.59  | 3.21  | 2.82  | 3.61  | 3.55  | 3.00  |       |       | 2.51  |       | 2.93  | 3.06  |       | 4.56     |
|             |                   | <i>S</i>               | 144.21 | 35.69 | 10.19 | 39.33 | 1.14  | 3.14  | 4.49  | 3.02  |       |       | 4.40  |       | 5.03  | 0.27  |       | 250.91   |
|             |                   | <i>V</i>               | 51.27  | 13.09 | 3.98  | 17.52 | 0.52  | 1.74  | 2.04  | 1.31  |       |       | 1.79  |       | 2.29  | 0.14  |       | 95.68    |
|             |                   | $\Delta_S$             | 57.48  | 14.22 | 4.06  | 15.67 | 0.45  | 1.25  | 1.79  | 1.21  |       |       | 1.76  |       | 2.01  | 0.11  |       | 100.00   |
|             |                   | $\Delta_V$             | 53.58  | 13.68 | 4.16  | 18.31 | 0.55  | 1.82  | 2.13  | 1.37  |       |       | 1.87  |       | 2.39  | 0.14  |       | 100.00   |
| V           | ZZZPUS10<br>298 K | <i>k</i>               | 68     | 84    | 10    | 12    | 6     | 20    | 4     | 12    |       |       | 8     |       | 4     | 2     |       | 230      |
|             |                   | <i>d<sub>min</sub></i> | 1.57   | 1.82  | 1.98  | 2.37  | 2.01  | 2.27  | 2.44  | 2.57  |       |       | 2.25  |       | 2.45  | 2.97  |       | 1.57     |
|             |                   | <i>d<sub>max</sub></i> | 4.52   | 4.90  | 2.66  | 2.97  | 2.85  | 3.64  | 2.70  | 3.36  |       |       | 2.49  |       | 2.89  | 2.97  |       | 4.90     |
|             |                   | <i>S</i>               | 159.22 | 36.27 | 8.38  | 37.93 | 1.96  | 4.20  | 3.29  | 5.66  |       |       | 4.07  |       | 5.31  | 0.57  |       | 266.87   |
|             |                   | <i>V</i>               | 56.37  | 13.51 | 3.07  | 16.78 | 0.75  | 2.02  | 1.48  | 2.64  |       |       | 1.65  |       | 2.40  | 0.28  |       | 100.95   |
|             |                   | $\Delta_S$             | 59.66  | 13.59 | 3.14  | 14.21 | 0.74  | 1.57  | 1.23  | 2.12  |       |       | 1.52  |       | 1.99  | 0.21  |       | 100.00   |
|             |                   | $\Delta_V$             | 55.84  | 13.38 | 3.05  | 16.63 | 0.74  | 2.00  | 1.46  | 2.62  |       |       | 1.63  |       | 2.38  | 0.28  |       | 100.00   |

Table S3.1. Characteristics of intermolecular noncovalent interactions in sulfapyridine polymorphs (VD polyhedra faces with RF = 0). The temperature at which X-ray diffraction experiments were conducted (as stated in respective .cif files) is provided below the refcodes.

| Form | Refcode           |                        | H···H  | H···C | H···N | H···O | H···S | C···C | C···N | C···O | C···S | N···N | N···O | N···S | O···O | O···S | S···S | $\Sigma$ |     |        |
|------|-------------------|------------------------|--------|-------|-------|-------|-------|-------|-------|-------|-------|-------|-------|-------|-------|-------|-------|----------|-----|--------|
| II   | BEWKUJ11<br>295 K | <i>k</i>               | 75     | 64    | 26    | 28    | 4     | 51    | 14    | 8     |       | 2     |       |       |       |       |       |          | 272 |        |
|      |                   | <i>d<sub>min</sub></i> | 2.06   | 2.78  | 1.90  | 2.09  | 3.63  | 3.66  | 3.56  | 3.19  |       | 4.02  |       |       |       |       |       |          |     | 1.90   |
|      |                   | <i>d<sub>max</sub></i> | 4.26   | 4.38  | 4.12  | 3.68  | 3.63  | 4.95  | 4.54  | 3.60  |       | 4.02  |       |       |       |       |       |          |     | 4.95   |
|      |                   | <i>S</i>               | 130.41 | 40.48 | 30.60 | 68.01 | 0.96  | 23.14 | 6.26  | 3.29  |       | 0.14  |       |       |       |       |       |          |     | 303.29 |
|      |                   | <i>V</i>               | 65.12  | 23.12 | 14.34 | 30.76 | 0.58  | 15.69 | 3.81  | 1.86  |       | 0.09  |       |       |       |       |       |          |     | 155.37 |
|      |                   | $\Delta_S$             | 43.00  | 13.35 | 10.09 | 22.42 | 0.32  | 7.63  | 2.06  | 1.08  |       | 0.05  |       |       |       |       |       |          |     | 100.00 |
|      |                   | $\Delta_V$             | 41.91  | 14.88 | 9.23  | 19.80 | 0.38  | 10.10 | 2.45  | 1.20  |       | 0.06  |       |       |       |       |       |          |     | 100.00 |
| III  | BEWKUJ15<br>173 K | <i>k</i>               | 70     | 90    | 30    | 28    | 8     | 37    | 12    |       |       |       |       |       | 2     |       |       |          | 277 |        |
|      |                   | <i>d<sub>min</sub></i> | 2.49   | 2.83  | 2.23  | 2.12  | 3.40  | 3.52  | 3.38  |       |       |       |       |       |       | 2.99  |       |          |     | 2.12   |
|      |                   | <i>d<sub>max</sub></i> | 4.56   | 4.68  | 4.60  | 4.30  | 4.46  | 4.85  | 4.61  |       |       |       |       |       |       | 3.78  |       |          |     | 4.85   |
|      |                   | <i>S</i>               | 124.11 | 51.55 | 30.94 | 68.83 | 0.40  | 18.52 | 6.12  |       |       |       |       |       |       | 1.99  |       |          |     | 302.47 |
|      |                   | <i>V</i>               | 62.66  | 29.07 | 15.30 | 31.00 | 0.25  | 12.24 | 3.98  |       |       |       |       |       |       | 1.23  |       |          |     | 155.73 |
|      |                   | $\Delta_S$             | 41.03  | 17.04 | 10.23 | 22.76 | 0.13  | 6.12  | 2.02  |       |       |       |       |       |       | 0.66  |       |          |     | 100.00 |
|      |                   | $\Delta_V$             | 40.24  | 18.67 | 9.83  | 19.90 | 0.16  | 7.86  | 2.56  |       |       |       |       |       |       | 0.79  |       |          |     | 100.00 |
| IV   | BEWKUJ05<br>295 K | <i>k</i>               | 70     | 78    | 16    | 32    | 4     | 25    | 18    | 10    |       | 1     | 4     | 2     |       |       |       |          | 260 |        |
|      |                   | <i>d<sub>min</sub></i> | 2.22   | 2.93  | 2.04  | 2.31  | 3.69  | 3.57  | 3.61  | 3.33  |       | 4.09  | 3.07  | 3.92  |       |       |       |          |     | 2.04   |
|      |                   | <i>d<sub>max</sub></i> | 4.23   | 4.40  | 4.41  | 4.61  | 3.70  | 3.94  | 4.07  | 3.75  |       | 4.09  | 3.75  | 3.92  |       |       |       |          |     | 4.61   |
|      |                   | <i>S</i>               | 122.72 | 61.95 | 25.76 | 72.42 | 0.78  | 13.91 | 6.57  | 1.72  |       | 0.12  | 2.32  | 0.02  |       |       |       |          |     | 308.29 |
|      |                   | <i>V</i>               | 61.77  | 34.51 | 12.05 | 35.22 | 0.48  | 8.56  | 4.10  | 1.00  |       | 0.09  | 1.30  | 0.02  |       |       |       |          |     | 159.07 |
|      |                   | $\Delta_S$             | 39.81  | 20.09 | 8.36  | 23.49 | 0.25  | 4.51  | 2.13  | 0.56  |       | 0.04  | 0.75  | 0.01  |       |       |       |          |     | 100.00 |
|      |                   | $\Delta_V$             | 38.83  | 21.70 | 7.57  | 22.14 | 0.30  | 5.38  | 2.57  | 0.63  |       | 0.05  | 0.81  | 0.01  |       |       |       |          |     | 100.00 |
| V    | BEWKUJ13<br>295 K | <i>k</i>               | 75     | 89    | 27    | 34    | 5     | 25    | 13    | 6     |       |       | 3     |       | 1     |       |       |          | 278 |        |
|      |                   | <i>d<sub>min</sub></i> | 2.34   | 2.77  | 1.83  | 2.11  | 2.88  | 3.44  | 3.49  | 3.50  |       |       | 3.00  |       | 3.39  |       |       |          |     | 1.83   |
|      |                   | <i>d<sub>max</sub></i> | 5.26   | 4.66  | 4.56  | 4.77  | 3.65  | 4.44  | 4.59  | 4.05  |       |       | 4.36  |       | 3.39  |       |       |          |     | 5.26   |
|      |                   | <i>S</i>               | 121.55 | 61.56 | 26.62 | 75.08 | 0.70  | 12.15 | 7.74  | 0.67  |       |       | 1.32  |       | 2.35  |       |       |          |     | 309.73 |
|      |                   | <i>V</i>               | 61.77  | 34.96 | 12.24 | 36.55 | 0.41  | 8.01  | 5.11  | 0.42  |       |       | 0.71  |       | 1.33  |       |       |          |     | 161.51 |
|      |                   | $\Delta_S$             | 39.24  | 19.88 | 8.59  | 24.24 | 0.23  | 3.92  | 2.50  | 0.22  |       |       | 0.43  |       | 0.76  |       |       |          |     | 100.00 |
|      |                   | $\Delta_V$             | 38.25  | 21.65 | 7.58  | 22.63 | 0.26  | 4.96  | 3.16  | 0.26  |       |       | 0.44  |       | 0.82  |       |       |          |     | 100.00 |
| Va   |                   | <i>k</i>               | 77     | 86    | 30    | 36    | 6     | 25    | 13    | 10    |       |       | 3     |       | 1     |       |       |          | 287 |        |
|      |                   | <i>d<sub>min</sub></i> | 2.34   | 2.77  | 1.83  | 2.11  | 2.88  | 3.44  | 3.49  | 3.50  |       |       | 3.24  |       | 3.39  |       |       |          |     | 1.83   |
|      |                   | <i>d<sub>max</sub></i> | 4.62   | 4.66  | 4.56  | 4.77  | 3.65  | 4.44  | 4.59  | 4.05  |       |       | 4.36  |       | 3.39  |       |       |          |     | 4.77   |
|      |                   | <i>S</i>               | 120.17 | 61.30 | 29.40 | 75.47 | 0.89  | 12.15 | 7.74  | 1.02  |       |       | 2.53  |       | 2.35  |       |       |          |     | 313.02 |
|      |                   | <i>V</i>               | 60.98  | 34.86 | 13.80 | 37.50 | 0.53  | 8.01  | 5.11  | 0.64  |       |       | 1.36  |       | 1.33  |       |       |          |     | 164.13 |
|      |                   | $\Delta_S$             | 38.39  | 19.58 | 9.39  | 24.11 | 0.29  | 3.88  | 2.47  | 0.33  |       |       | 0.81  |       | 0.75  |       |       |          |     | 100.00 |
|      |                   | $\Delta_V$             | 37.16  | 21.24 | 8.41  | 22.85 | 0.32  | 4.88  | 3.11  | 0.39  |       |       | 0.83  |       | 0.81  |       |       |          |     | 100.00 |



Table S3.1. (continued)

| Form | Refcode           |                        | H···H  | H···C | H···N | H···O | H···S | C···C | C···N | C···O | C···S | N···N | N···O | N···S | O···O | O···S | S···S | $\Sigma$ |
|------|-------------------|------------------------|--------|-------|-------|-------|-------|-------|-------|-------|-------|-------|-------|-------|-------|-------|-------|----------|
| Vb   |                   | <i>k</i>               | 73     | 92    | 24    | 32    | 4     | 25    | 13    | 2     |       |       | 3     |       | 1     |       |       | 269      |
|      |                   | <i>d<sub>min</sub></i> | 2.34   | 2.77  | 1.83  | 2.11  | 2.88  | 3.44  | 3.49  | 3.54  |       |       | 3.00  |       | 3.39  |       |       | 1.83     |
|      |                   | <i>d<sub>max</sub></i> | 5.26   | 4.66  | 4.56  | 4.77  | 3.62  | 4.44  | 4.59  | 3.91  |       |       | 4.36  |       | 3.39  |       |       | 5.26     |
|      |                   | <i>S</i>               | 122.93 | 61.83 | 23.84 | 74.68 | 0.51  | 12.15 | 7.74  | 0.31  |       |       | 0.11  |       | 2.35  |       |       | 306.44   |
|      |                   | <i>V</i>               | 62.56  | 35.06 | 10.67 | 35.60 | 0.30  | 8.01  | 5.11  | 0.19  |       |       | 0.06  |       | 1.33  |       |       | 158.90   |
|      |                   | $\Delta_S$             | 40.11  | 20.18 | 7.78  | 24.37 | 0.17  | 3.96  | 2.52  | 0.10  |       |       | 0.04  |       | 0.77  |       |       | 100.00   |
|      |                   | $\Delta_V$             | 39.37  | 22.07 | 6.72  | 22.41 | 0.19  | 5.04  | 3.22  | 0.12  |       |       | 0.04  |       | 0.84  |       |       | 100.00   |
| VI   | BEWKUJ14<br>120 K | <i>k</i>               | 71     | 83    | 27    | 30    | 5     | 34    | 8     | 2     |       | 2     | 1     |       | 2     |       |       | 265      |
|      |                   | <i>d<sub>min</sub></i> | 2.29   | 2.71  | 2.07  | 2.03  | 3.09  | 3.50  | 3.38  | 3.80  |       |       | 3.28  | 3.71  |       | 3.87  |       | 2.03     |
|      |                   | <i>d<sub>max</sub></i> | 4.89   | 4.64  | 4.40  | 5.01  | 3.99  | 4.60  | 4.78  | 4.23  |       |       | 3.29  | 3.71  |       | 4.34  |       | 5.01     |
|      |                   | <i>S</i>               | 111.48 | 60.64 | 32.99 | 73.04 | 0.95  | 13.85 | 2.66  | 1.14  |       |       | 0.13  | 1.20  |       | 0.54  |       | 298.62   |
|      |                   | <i>V</i>               | 56.99  | 35.56 | 15.86 | 33.92 | 0.54  | 9.20  | 1.63  | 0.73  |       |       | 0.07  | 0.74  |       | 0.35  |       | 155.59   |
|      |                   | $\Delta_S$             | 37.33  | 20.31 | 11.05 | 24.46 | 0.32  | 4.64  | 0.89  | 0.38  |       |       | 0.04  | 0.40  |       | 0.18  |       | 100.00   |
|      |                   | $\Delta_V$             | 36.63  | 22.86 | 10.19 | 21.80 | 0.35  | 5.91  | 1.05  | 0.47  |       |       | 0.05  | 0.47  |       | 0.22  |       | 100.00   |
| VIa  |                   | <i>k</i>               | 73     | 85    | 25    | 33    | 5     | 34    | 8     | 2     |       | 2     | 1     |       | 2     |       |       | 270      |
|      |                   | <i>d<sub>min</sub></i> | 2.29   | 2.71  | 2.09  | 2.03  | 3.09  | 3.50  | 3.38  | 3.80  |       |       | 3.28  | 3.71  |       | 3.87  |       | 2.03     |
|      |                   | <i>d<sub>max</sub></i> | 4.89   | 4.64  | 4.40  | 5.01  | 3.99  | 4.60  | 4.78  | 4.23  |       |       | 3.29  | 3.71  |       | 4.34  |       | 5.01     |
|      |                   | <i>S</i>               | 110.11 | 63.13 | 29.92 | 78.13 | 0.95  | 13.85 | 2.66  | 1.14  |       |       | 0.13  | 1.20  |       | 0.54  |       | 301.76   |
|      |                   | <i>V</i>               | 56.50  | 37.22 | 14.25 | 35.17 | 0.54  | 9.20  | 1.63  | 0.73  |       |       | 0.07  | 0.74  |       | 0.35  |       | 156.38   |
|      |                   | $\Delta_S$             | 36.49  | 20.92 | 9.92  | 25.89 | 0.31  | 4.59  | 0.88  | 0.38  |       |       | 0.04  | 0.40  |       | 0.18  |       | 100.00   |
|      |                   | $\Delta_V$             | 36.13  | 23.80 | 9.11  | 22.49 | 0.34  | 5.88  | 1.04  | 0.46  |       |       | 0.05  | 0.47  |       | 0.22  |       | 100.00   |
| VIb  |                   | <i>k</i>               | 69     | 81    | 29    | 27    | 5     | 34    | 8     | 2     |       | 2     | 1     |       | 2     |       |       | 260      |
|      |                   | <i>d<sub>min</sub></i> | 2.29   | 2.71  | 2.07  | 2.46  | 3.09  | 3.50  | 3.38  | 3.80  |       |       | 3.28  | 3.71  |       | 3.87  |       | 2.07     |
|      |                   | <i>d<sub>max</sub></i> | 4.89   | 4.64  | 4.40  | 5.01  | 3.99  | 4.60  | 4.78  | 4.23  |       |       | 3.29  | 3.71  |       | 4.34  |       | 5.01     |
|      |                   | <i>S</i>               | 112.85 | 58.16 | 36.05 | 67.95 | 0.95  | 13.85 | 2.66  | 1.14  |       |       | 0.13  | 1.20  |       | 0.54  |       | 295.47   |
|      |                   | <i>V</i>               | 57.49  | 33.91 | 17.47 | 32.67 | 0.54  | 9.20  | 1.63  | 0.73  |       |       | 0.07  | 0.74  |       | 0.35  |       | 154.80   |
|      |                   | $\Delta_S$             | 38.19  | 19.68 | 12.20 | 23.00 | 0.32  | 4.69  | 0.90  | 0.39  |       |       | 0.05  | 0.40  |       | 0.18  |       | 100.00   |
|      |                   | $\Delta_V$             | 37.14  | 21.91 | 11.29 | 21.10 | 0.35  | 5.94  | 1.05  | 0.47  |       |       | 0.05  | 0.48  |       | 0.23  |       | 100.00   |

Table S3.2. Characteristics of intermolecular noncovalent interactions in sulfamerazine polymorphs (VD polyhedra faces with RF = 0). The temperature at which X-ray diffraction experiments were conducted (as stated in respective .cif files) is provided below the refcodes.

| Form                    | Refcode           |                        | H···H  | H···C | H···N | H···O | H···S | C···C | C···N | C···O | C···S | N···N | N···O | N···S | O···O | O···S | S···S | Σ   |        |
|-------------------------|-------------------|------------------------|--------|-------|-------|-------|-------|-------|-------|-------|-------|-------|-------|-------|-------|-------|-------|-----|--------|
| <i>P2<sub>1</sub>/c</i> | SLFNMA03<br>150 K | <i>k</i>               | 76     | 60    | 52    | 22    | 2     | 21    | 20    | 12    |       |       |       |       | 3     | 2     |       | 270 |        |
|                         |                   | <i>d<sub>min</sub></i> | 2.42   | 2.71  | 2.08  | 2.14  | 3.35  | 3.36  | 3.68  | 3.27  |       |       |       |       |       | 3.76  | 3.75  |     | 2.08   |
|                         |                   | <i>d<sub>max</sub></i> | 4.62   | 4.70  | 4.90  | 3.93  | 3.35  | 4.70  | 4.79  | 4.06  |       |       |       |       |       | 3.80  | 3.75  |     | 4.90   |
|                         |                   | <i>S</i>               | 137.12 | 52.71 | 48.39 | 56.97 | 0.46  | 8.96  | 4.14  | 11.39 |       |       |       |       |       | 2.46  | 0.67  |     | 323.26 |
|                         |                   | <i>V</i>               | 69.81  | 29.58 | 26.29 | 24.58 | 0.26  | 6.33  | 2.99  | 6.53  |       |       |       |       |       | 1.55  | 0.42  |     | 168.33 |
|                         |                   | $\Delta_S$             | 42.42  | 16.31 | 14.97 | 17.62 | 0.14  | 2.77  | 1.28  | 3.52  |       |       |       |       |       | 0.76  | 0.21  |     | 100.00 |
|                         |                   | $\Delta_V$             | 41.47  | 17.57 | 15.62 | 14.60 | 0.15  | 3.76  | 1.78  | 3.88  |       |       |       |       |       | 0.92  | 0.25  |     | 100.00 |
| <i>Pbca</i>             | SLFNMA01<br>295 K | <i>k</i>               | 72     | 102   | 36    | 28    | 2     | 22    | 14    | 10    | 2     | 2     | 2     |       |       |       |       |     | 292    |
|                         |                   | <i>d<sub>min</sub></i> | 2.34   | 2.90  | 2.06  | 2.30  | 3.36  | 3.71  | 3.50  | 3.17  | 3.98  | 4.26  | 3.80  |       |       |       |       |     | 2.06   |
|                         |                   | <i>d<sub>max</sub></i> | 4.34   | 4.92  | 4.70  | 3.91  | 3.36  | 4.86  | 4.47  | 4.46  | 3.98  | 4.26  | 3.80  |       |       |       |       |     | 4.92   |
|                         |                   | <i>S</i>               | 122.38 | 64.50 | 47.06 | 67.87 | 0.87  | 7.47  | 5.27  | 6.63  | 0.09  | 1.05  | 0.92  |       |       |       |       |     | 324.11 |
|                         |                   | <i>V</i>               | 58.38  | 37.69 | 22.57 | 30.94 | 0.49  | 5.18  | 3.54  | 3.89  | 0.06  | 0.75  | 0.59  |       |       |       |       |     | 164.06 |
|                         |                   | $\Delta_S$             | 37.76  | 19.90 | 14.52 | 20.94 | 0.27  | 2.30  | 1.63  | 2.05  | 0.03  | 0.32  | 0.28  |       |       |       |       |     | 100.00 |
|                         |                   | $\Delta_V$             | 35.59  | 22.97 | 13.76 | 18.86 | 0.30  | 3.16  | 2.16  | 2.37  | 0.04  | 0.46  | 0.36  |       |       |       |       |     | 100.00 |
| <i>Pna2<sub>1</sub></i> | SLFNMA04<br>150 K | <i>k</i>               | 76     | 68    | 46    | 26    | 5     | 24    | 12    | 3     |       |       | 1     | 1     |       | 1     |       |     | 263    |
|                         |                   | <i>d<sub>min</sub></i> | 2.51   | 2.74  | 2.02  | 2.25  | 3.25  | 3.40  | 3.99  | 3.35  |       |       |       | 3.45  | 3.54  |       | 3.65  |     | 2.02   |
|                         |                   | <i>d<sub>max</sub></i> | 4.89   | 4.75  | 4.89  | 4.33  | 3.38  | 4.79  | 4.82  | 3.54  |       |       |       | 3.45  | 3.54  |       | 3.65  |     | 4.89   |
|                         |                   | <i>S</i>               | 122.38 | 61.94 | 54.93 | 73.03 | 1.46  | 10.64 | 0.92  | 1.86  |       |       |       | 0.31  | 0.30  |       | 0.86  |     | 328.63 |
|                         |                   | <i>V</i>               | 66.01  | 34.59 | 29.22 | 33.38 | 0.81  | 7.34  | 0.68  | 1.07  |       |       |       | 0.18  | 0.18  |       | 0.52  |     | 173.98 |
|                         |                   | $\Delta_S$             | 37.24  | 18.85 | 16.72 | 22.22 | 0.44  | 3.24  | 0.28  | 0.57  |       |       |       | 0.09  | 0.09  |       | 0.26  |     | 100.00 |
|                         |                   | $\Delta_V$             | 37.94  | 19.88 | 16.80 | 19.19 | 0.46  | 4.22  | 0.39  | 0.62  |       |       |       | 0.10  | 0.10  |       | 0.30  |     | 100.00 |
| <i>a</i>                |                   | <i>k</i>               | 77     | 68    | 46    | 25    | 5     | 24    | 12    | 3     |       |       |       | 1     |       | 1     |       |     | 262    |
|                         |                   | <i>d<sub>min</sub></i> | 2.55   | 2.74  | 2.02  | 2.25  | 3.25  | 3.40  | 3.99  | 3.35  |       |       |       | 3.54  |       |       | 3.65  |     | 2.02   |
|                         |                   | <i>d<sub>max</sub></i> | 4.89   | 4.75  | 4.89  | 4.33  | 3.37  | 4.79  | 4.82  | 3.54  |       |       |       | 3.54  |       |       | 3.65  |     | 4.89   |
|                         |                   | <i>S</i>               | 124.91 | 62.10 | 55.23 | 70.99 | 1.47  | 10.64 | 0.92  | 1.86  |       |       |       | 0.30  |       |       | 0.86  |     | 329.28 |
|                         |                   | <i>V</i>               | 67.17  | 34.66 | 29.09 | 32.52 | 0.81  | 7.34  | 0.68  | 1.07  |       |       |       | 0.18  |       |       | 0.52  |     | 174.04 |
|                         |                   | $\Delta_S$             | 37.94  | 18.86 | 16.77 | 21.56 | 0.45  | 3.23  | 0.28  | 0.57  |       |       |       | 0.09  |       |       | 0.26  |     | 100.00 |
|                         |                   | $\Delta_V$             | 38.59  | 19.92 | 16.72 | 18.68 | 0.47  | 4.21  | 0.39  | 0.62  |       |       |       | 0.10  |       |       | 0.30  |     | 100.00 |
| <i>b</i>                |                   | <i>k</i>               | 75     | 68    | 46    | 27    | 5     | 24    | 12    | 3     |       |       | 2     | 1     |       | 1     |       |     | 264    |
|                         |                   | <i>d<sub>min</sub></i> | 2.51   | 2.74  | 2.02  | 2.29  | 3.25  | 3.40  | 3.99  | 3.35  |       |       |       | 3.45  | 3.54  |       | 3.65  |     | 2.02   |
|                         |                   | <i>d<sub>max</sub></i> | 4.89   | 4.75  | 4.89  | 4.33  | 3.38  | 4.79  | 4.82  | 3.54  |       |       |       | 3.45  | 3.54  |       | 3.65  |     | 4.89   |
|                         |                   | <i>S</i>               | 119.86 | 61.77 | 54.64 | 75.07 | 1.45  | 10.64 | 0.92  | 1.86  |       |       |       | 0.62  | 0.30  |       | 0.86  |     | 327.98 |
|                         |                   | <i>V</i>               | 64.86  | 34.52 | 29.35 | 34.24 | 0.80  | 7.34  | 0.68  | 1.07  |       |       |       | 0.36  | 0.18  |       | 0.52  |     | 173.92 |
|                         |                   | $\Delta_S$             | 36.54  | 18.83 | 16.66 | 22.89 | 0.44  | 3.24  | 0.28  | 0.57  |       |       |       | 0.19  | 0.09  |       | 0.26  |     | 100.00 |
|                         |                   | $\Delta_V$             | 37.29  | 19.85 | 16.88 | 19.69 | 0.46  | 4.22  | 0.39  | 0.62  |       |       |       | 0.21  | 0.10  |       | 0.30  |     | 100.00 |

Table S3.3. Characteristics of intermolecular noncovalent interactions in sulfamethoxazole polymorphs (VD polyhedra faces with RF = 0). The temperature at which X-ray diffraction experiments were conducted (as stated in respective .cif files) is provided below the refcodes.

| Form | Refcode           |                        | H···H  | H···C | H···N | H···O | H···S | C···C | C···N | C···O | C···S | N···N | N···O | N···S | O···O | O···S | S···S | Σ      |
|------|-------------------|------------------------|--------|-------|-------|-------|-------|-------|-------|-------|-------|-------|-------|-------|-------|-------|-------|--------|
| I    | SLFNMB01<br>295 K | <i>k</i>               | 67     | 72    | 28    | 42    | 4     | 6     | 6     | 10    |       | 3     | 2     |       | 3     |       |       | 243    |
|      |                   | <i>d<sub>min</sub></i> | 2.56   | 2.88  | 2.42  | 2.39  | 3.47  | 3.40  | 3.52  | 3.57  |       | 3.35  | 3.59  |       | 3.81  |       |       | 2.39   |
|      |                   | <i>d<sub>max</sub></i> | 4.24   | 4.25  | 3.86  | 4.50  | 3.92  | 3.84  | 3.91  | 4.27  |       | 3.62  | 3.59  |       | 3.85  |       |       | 4.50   |
|      |                   | <i>S</i>               | 82.46  | 66.75 | 37.23 | 95.62 | 0.88  | 0.12  | 2.37  | 5.58  |       | 3.44  | 1.28  |       | 2.60  |       |       | 298.32 |
|      |                   | <i>V</i>               | 43.02  | 36.28 | 18.30 | 46.33 | 0.54  | 0.07  | 1.45  | 3.41  |       | 1.98  | 0.77  |       | 1.66  |       |       | 153.80 |
|      |                   | $\Delta_S$             | 27.64  | 22.37 | 12.48 | 32.05 | 0.29  | 0.04  | 0.79  | 1.87  |       | 1.15  | 0.43  |       | 0.87  |       |       | 100.00 |
|      |                   | $\Delta_V$             | 27.97  | 23.59 | 11.90 | 30.12 | 0.35  | 0.05  | 0.94  | 2.22  |       | 1.29  | 0.50  |       | 1.08  |       |       | 100.00 |
| II   | SLFNMB02<br>295 K | <i>k</i>               | 66     | 70    | 24    | 44    | 6     | 12    | 6     | 14    |       | 1     | 4     |       | 8     | 2     |       | 257    |
|      |                   | <i>d<sub>min</sub></i> | 2.65   | 3.06  | 2.06  | 2.11  | 3.19  | 3.47  | 3.66  | 3.57  |       | 3.38  | 3.47  |       | 3.57  | 4.13  |       | 2.06   |
|      |                   | <i>d<sub>max</sub></i> | 4.74   | 4.14  | 4.15  | 4.20  | 3.76  | 3.92  | 3.90  | 4.24  |       | 3.38  | 3.70  |       | 4.26  | 4.13  |       | 4.74   |
|      |                   | <i>S</i>               | 96.83  | 58.54 | 42.16 | 94.16 | 0.94  | 5.72  | 1.12  | 4.97  |       | <0.01 | 1.61  |       | 4.96  | 0.04  |       | 311.05 |
|      |                   | <i>V</i>               | 49.76  | 34.10 | 19.72 | 45.05 | 0.56  | 3.43  | 0.69  | 3.11  |       | <0.01 | 0.98  |       | 3.05  | 0.03  |       | 160.46 |
|      |                   | $\Delta_S$             | 31.13  | 18.82 | 13.55 | 30.27 | 0.30  | 1.84  | 0.36  | 1.60  |       | <0.01 | 0.52  |       | 1.59  | 0.01  |       | 100.00 |
|      |                   | $\Delta_V$             | 31.01  | 21.25 | 12.29 | 28.07 | 0.35  | 2.13  | 0.43  | 1.94  |       | <0.01 | 0.61  |       | 1.90  | 0.02  |       | 100.00 |
| III  | SLFNMB05<br>153 K | <i>k</i>               | 64     | 70    | 22    | 48    | 6     | 13    | 6     | 14    |       |       | 8     |       | 5     |       |       | 256    |
|      |                   | <i>d<sub>min</sub></i> | 2.40   | 2.90  | 1.95  | 2.14  | 3.49  | 3.52  | 3.58  | 3.34  |       |       | 3.31  |       | 3.88  |       |       | 1.95   |
|      |                   | <i>d<sub>max</sub></i> | 4.58   | 4.33  | 4.27  | 4.42  | 4.20  | 3.99  | 3.92  | 3.89  |       |       | 3.98  |       | 3.94  |       |       | 4.58   |
|      |                   | <i>S</i>               | 100.30 | 53.71 | 38.06 | 91.45 | 0.81  | 5.84  | 1.78  | 10.16 |       |       | 3.36  |       | 1.95  |       |       | 307.41 |
|      |                   | <i>V</i>               | 49.78  | 30.95 | 17.01 | 44.50 | 0.52  | 3.50  | 1.07  | 5.96  |       |       | 1.94  |       | 1.27  |       |       | 156.49 |
|      |                   | $\Delta_S$             | 32.63  | 17.47 | 12.38 | 29.75 | 0.26  | 1.90  | 0.58  | 3.31  |       |       | 1.09  |       | 0.63  |       |       | 100.00 |
|      |                   | $\Delta_V$             | 31.81  | 19.78 | 10.87 | 28.44 | 0.33  | 2.24  | 0.68  | 3.81  |       |       | 1.24  |       | 0.81  |       |       | 100.00 |
| IV   | SLFNMB06<br>153 K | <i>k</i>               | 62     | 78    | 28    | 44    | 8     | 13    | 8     | 10    |       |       | 8     | 2     | 3     |       |       | 264    |
|      |                   | <i>d<sub>min</sub></i> | 2.62   | 3.01  | 2.36  | 2.13  | 3.15  | 3.52  | 3.40  | 3.84  |       |       | 3.18  | 3.59  | 3.22  |       |       | 2.13   |
|      |                   | <i>d<sub>max</sub></i> | 4.23   | 4.43  | 3.89  | 4.28  | 3.73  | 4.41  | 4.21  | 4.43  |       |       | 4.07  | 3.59  | 3.45  |       |       | 4.43   |
|      |                   | <i>S</i>               | 89.85  | 62.01 | 39.01 | 95.19 | 0.69  | 7.37  | 2.01  | 2.15  |       |       | 1.19  | 0.25  | 3.16  |       |       | 302.86 |
|      |                   | <i>V</i>               | 46.69  | 34.03 | 18.91 | 45.36 | 0.37  | 4.53  | 1.29  | 1.47  |       |       | 0.66  | 0.15  | 1.74  |       |       | 155.19 |
|      |                   | $\Delta_S$             | 29.67  | 20.47 | 12.88 | 31.43 | 0.23  | 2.43  | 0.66  | 0.71  |       |       | 0.39  | 0.08  | 1.04  |       |       | 100.00 |
|      |                   | $\Delta_V$             | 30.08  | 21.93 | 12.18 | 29.23 | 0.24  | 2.92  | 0.83  | 0.94  |       |       | 0.42  | 0.10  | 1.12  |       |       | 100.00 |

Table S3.4. Characteristics of intermolecular noncovalent interactions in sulfathiazole polymorphs (VD polyhedra faces with RF = 0). The temperature at which X-ray diffraction experiments were conducted (as stated in respective .cif files) is provided below the refcodes.

| Form | Refcode           |                        | H...H | H...C | H...N | H...O | H...S | C...C | C...N | C...O | C...S | N...N | N...O | N...S | O...O | O...S | S...S | $\Sigma$ |
|------|-------------------|------------------------|-------|-------|-------|-------|-------|-------|-------|-------|-------|-------|-------|-------|-------|-------|-------|----------|
| I    | SUTHAZ29<br>105 K | <i>k</i>               | 57    | 76    | 19    | 32    | 22    | 14    | 16    | 4     | 5     | 3     |       | 4     | 1     | 1     |       | 254      |
|      |                   | <i>d<sub>min</sub></i> | 2.20  | 2.57  | 1.81  | 1.95  | 2.88  | 3.54  | 3.11  | 3.39  | 3.41  | 3.31  |       | 3.62  | 4.43  | 3.62  |       | 1.81     |
|      |                   | <i>d<sub>max</sub></i> | 4.81  | 4.74  | 4.21  | 5.09  | 4.67  | 4.89  | 4.34  | 4.36  | 4.53  | 4.79  |       | 4.52  | 4.43  | 3.62  |       | 5.09     |
|      |                   | <i>S</i>               | 87.43 | 65.05 | 26.97 | 70.60 | 21.82 | 5.84  | 7.67  | 0.90  | 3.46  | 0.89  |       | 2.85  | 0.60  | 4.33  |       | 298.40   |
|      |                   | <i>V</i>               | 44.04 | 36.44 | 10.90 | 31.72 | 12.73 | 3.75  | 4.80  | 0.59  | 2.12  | 0.51  |       | 1.79  | 0.45  | 2.61  |       | 152.44   |
|      |                   | $\Delta_S$             | 29.30 | 21.80 | 9.04  | 23.66 | 7.31  | 1.96  | 2.57  | 0.30  | 1.16  | 0.30  |       | 0.96  | 0.20  | 1.45  |       | 100.00   |
|      |                   | $\Delta_V$             | 28.89 | 23.91 | 7.15  | 20.81 | 8.35  | 2.46  | 3.15  | 0.39  | 1.39  | 0.33  |       | 1.17  | 0.29  | 1.71  |       | 100.00   |
| Ia   |                   | <i>k</i>               | 56    | 72    | 17    | 33    | 23    | 14    | 16    | 3     | 5     | 3     |       | 4     |       |       |       | 246      |
|      |                   | <i>d<sub>min</sub></i> | 2.20  | 2.57  | 1.84  | 1.95  | 2.94  | 3.54  | 3.11  | 3.39  | 3.41  | 3.31  |       | 3.62  |       |       |       | 1.84     |
|      |                   | <i>d<sub>max</sub></i> | 4.81  | 4.74  | 4.21  | 5.09  | 4.67  | 4.89  | 4.34  | 4.36  | 4.53  | 4.79  |       | 4.52  |       |       |       | 5.09     |
|      |                   | <i>S</i>               | 83.78 | 60.25 | 25.08 | 83.45 | 28.64 | 5.84  | 7.67  | 0.90  | 3.46  | 0.89  |       | 2.85  |       |       |       | 302.81   |
|      |                   | <i>V</i>               | 43.31 | 33.98 | 10.12 | 36.47 | 16.13 | 3.75  | 4.80  | 0.58  | 2.12  | 0.51  |       | 1.79  |       |       |       | 153.56   |
|      |                   | $\Delta_S$             | 27.67 | 19.90 | 8.28  | 27.56 | 9.46  | 1.93  | 2.53  | 0.30  | 1.14  | 0.29  |       | 0.94  |       |       |       | 100.00   |
|      |                   | $\Delta_V$             | 28.20 | 22.13 | 6.59  | 23.75 | 10.51 | 2.44  | 3.12  | 0.38  | 1.38  | 0.33  |       | 1.16  |       |       |       | 100.00   |
| Ib   |                   | <i>k</i>               | 57    | 80    | 21    | 31    | 21    | 14    | 16    | 5     | 5     | 3     |       | 4     | 1     | 2     |       | 260      |
|      |                   | <i>d<sub>min</sub></i> | 2.20  | 2.57  | 1.81  | 2.23  | 2.88  | 3.54  | 3.11  | 3.39  | 3.41  | 3.31  |       | 3.62  | 4.43  | 3.62  |       | 1.81     |
|      |                   | <i>d<sub>max</sub></i> | 4.81  | 4.74  | 4.21  | 5.09  | 4.67  | 4.89  | 4.34  | 4.36  | 4.53  | 4.79  |       | 4.52  | 4.43  | 3.62  |       | 5.09     |
|      |                   | <i>S</i>               | 91.07 | 69.85 | 28.85 | 57.74 | 15.00 | 5.84  | 7.67  | 0.90  | 3.46  | 0.89  |       | 2.85  | 1.21  | 8.66  |       | 293.99   |
|      |                   | <i>V</i>               | 44.77 | 38.91 | 11.67 | 26.97 | 9.33  | 3.75  | 4.80  | 0.59  | 2.12  | 0.51  |       | 1.79  | 0.89  | 5.22  |       | 151.32   |
|      |                   | $\Delta_S$             | 30.98 | 23.76 | 9.81  | 19.64 | 5.10  | 1.98  | 2.61  | 0.31  | 1.18  | 0.30  |       | 0.97  | 0.41  | 2.94  |       | 100.00   |
|      |                   | $\Delta_V$             | 29.58 | 25.71 | 7.71  | 17.82 | 6.17  | 2.48  | 3.17  | 0.39  | 1.40  | 0.34  |       | 1.18  | 0.59  | 3.45  |       | 100.00   |
| II   | SUTHAZ31<br>100 K | <i>k</i>               | 51    | 60    | 22    | 26    | 26    | 23    | 14    | 2     | 4     | 3     |       |       | 1     |       |       | 232      |
|      |                   | <i>d<sub>min</sub></i> | 2.17  | 2.54  | 1.82  | 2.02  | 2.83  | 3.44  | 3.41  | 3.35  | 4.03  | 3.20  |       |       | 4.05  |       |       | 1.82     |
|      |                   | <i>d<sub>max</sub></i> | 4.40  | 4.48  | 4.47  | 4.44  | 4.27  | 4.45  | 4.44  | 3.35  | 4.09  | 3.80  |       |       | 4.05  |       |       | 4.48     |
|      |                   | <i>S</i>               | 79.07 | 72.68 | 29.35 | 71.68 | 33.05 | 3.39  | 4.71  | 0.21  | 4.58  | 1.46  |       |       | 1.90  |       |       | 302.09   |
|      |                   | <i>V</i>               | 38.30 | 38.71 | 14.08 | 30.61 | 18.43 | 2.19  | 2.77  | 0.12  | 3.10  | 0.78  |       |       | 1.29  |       |       | 150.37   |
|      |                   | $\Delta_S$             | 26.17 | 24.06 | 9.72  | 23.73 | 10.94 | 1.12  | 1.56  | 0.07  | 1.51  | 0.48  |       |       | 0.63  |       |       | 100.00   |
|      |                   | $\Delta_V$             | 25.47 | 25.74 | 9.37  | 20.36 | 12.25 | 1.46  | 1.84  | 0.08  | 2.06  | 0.52  |       |       | 0.85  |       |       | 100.00   |
| III  | SUTHAZ34<br>100 K | <i>k</i>               | 54    | 58    | 22    | 27    | 23    | 17    | 11    | 6     | 5     | 2     | 1     | 1     | 1     | 2     |       | 230      |
|      |                   | <i>d<sub>min</sub></i> | 2.15  | 2.48  | 1.80  | 1.98  | 2.94  | 3.42  | 3.39  | 3.33  | 3.74  | 3.18  | 3.35  | 3.86  | 2.97  | 4.03  |       | 1.80     |
|      |                   | <i>d<sub>max</sub></i> | 4.56  | 4.52  | 4.28  | 4.51  | 4.29  | 4.39  | 4.47  | 4.11  | 4.09  | 3.78  | 3.35  | 3.86  | 4.02  | 4.38  |       | 4.56     |
|      |                   | <i>S</i>               | 77.69 | 71.39 | 30.28 | 65.71 | 32.24 | 2.44  | 3.18  | 4.18  | 5.34  | 0.78  | 2.08  | 0.02  | 1.90  | 0.28  |       | 297.51   |
|      |                   | <i>V</i>               | 37.40 | 37.60 | 13.63 | 28.18 | 18.23 | 1.60  | 1.86  | 2.49  | 3.59  | 0.41  | 1.16  | 0.02  | 1.13  | 0.19  |       | 147.47   |
|      |                   | $\Delta_S$             | 26.11 | 23.99 | 10.18 | 22.09 | 10.84 | 0.82  | 1.07  | 1.41  | 1.79  | 0.26  | 0.70  | 0.01  | 0.64  | 0.09  |       | 100.00   |
|      |                   | $\Delta_V$             | 25.36 | 25.50 | 9.24  | 19.11 | 12.36 | 1.09  | 1.26  | 1.69  | 2.43  | 0.28  | 0.79  | 0.01  | 0.76  | 0.13  |       | 100.00   |

Table S3.4. (continued)

| Form | Refcode           |                        | H···H | H···C | H···N | H···O | H···S | C···C | C···N | C···O | C···S | N···N | N···O | N···S | O···O | O···S | S···S | $\Sigma$ |        |
|------|-------------------|------------------------|-------|-------|-------|-------|-------|-------|-------|-------|-------|-------|-------|-------|-------|-------|-------|----------|--------|
| IIIa |                   | <i>k</i>               | 55    | 62    | 24    | 24    | 24    | 18    | 13    | 1     | 4     | 2     |       | 1     | 1     |       |       | 229      |        |
|      |                   | <i>d<sub>min</sub></i> | 2.15  | 2.48  | 1.80  | 1.98  | 2.94  | 3.42  | 3.39  | 3.33  | 4.00  | 3.18  |       | 3.86  | 4.02  |       |       |          | 1.80   |
|      |                   | <i>d<sub>max</sub></i> | 4.56  | 4.52  | 4.28  | 4.51  | 4.29  | 4.39  | 4.48  | 3.33  | 4.09  | 3.78  |       | 3.86  | 4.02  |       |       |          | 4.56   |
|      |                   | <i>S</i>               | 75.62 | 74.91 | 32.54 | 65.27 | 31.80 | 2.94  | 4.31  | 0.20  | 5.08  | 1.56  |       | 0.02  | 2.13  |       |       |          | 296.39 |
|      |                   | <i>V</i>               | 36.09 | 39.62 | 14.87 | 27.86 | 17.93 | 1.89  | 2.51  | 0.11  | 3.43  | 0.83  |       | 0.02  | 1.43  |       |       |          | 146.58 |
|      |                   | $\Delta_S$             | 25.51 | 25.27 | 10.98 | 22.02 | 10.73 | 0.99  | 1.45  | 0.07  | 1.72  | 0.53  |       | 0.01  | 0.72  |       |       |          | 100.00 |
|      |                   | $\Delta_V$             | 24.62 | 27.03 | 10.14 | 19.01 | 12.23 | 1.29  | 1.71  | 0.08  | 2.34  | 0.56  |       | 0.01  | 0.97  |       |       |          | 100.00 |
| IIIb |                   | <i>k</i>               | 52    | 54    | 20    | 30    | 22    | 16    | 9     | 11    | 6     | 1     | 2     | 1     | 1     | 4     |       | 229      |        |
|      |                   | <i>d<sub>min</sub></i> | 2.15  | 2.48  | 1.80  | 1.98  | 2.96  | 3.51  | 3.39  | 3.33  | 3.74  | 3.78  | 3.35  | 3.86  | 2.97  | 4.03  |       |          | 1.80   |
|      |                   | <i>d<sub>max</sub></i> | 4.56  | 4.52  | 4.28  | 4.51  | 4.29  | 4.39  | 4.48  | 4.11  | 4.09  | 3.78  | 3.35  | 3.86  | 2.97  | 4.38  |       |          | 4.56   |
|      |                   | <i>S</i>               | 79.75 | 67.86 | 28.03 | 66.15 | 32.68 | 1.94  | 2.05  | 8.16  | 5.59  | <0.01 | 4.15  | 0.02  | 1.67  | 0.56  |       |          | 298.62 |
|      |                   | <i>V</i>               | 38.70 | 35.59 | 12.38 | 28.49 | 18.52 | 1.32  | 1.21  | 4.87  | 3.74  | <0.01 | 2.32  | 0.02  | 0.83  | 0.38  |       |          | 148.37 |
|      |                   | $\Delta_S$             | 26.71 | 22.72 | 9.38  | 22.15 | 10.94 | 0.65  | 0.69  | 2.73  | 1.87  | <0.01 | 1.39  | 0.01  | 0.56  | 0.19  |       |          | 100.00 |
|      |                   | $\Delta_V$             | 26.08 | 23.99 | 8.34  | 19.20 | 12.48 | 0.89  | 0.81  | 3.28  | 2.52  | <0.01 | 1.56  | 0.01  | 0.56  | 0.26  |       |          | 100.00 |
| IV   | SUTHAZ37<br>100 K | <i>k</i>               | 52    | 62    | 22    | 26    | 20    | 19    | 10    | 12    | 6     |       | 2     | 2     | 1     | 4     |       | 238      |        |
|      |                   | <i>d<sub>min</sub></i> | 2.08  | 2.54  | 1.89  | 2.00  | 2.98  | 3.52  | 3.37  | 3.33  | 3.72  |       | 3.35  | 4.60  | 2.93  | 4.09  |       |          | 1.89   |
|      |                   | <i>d<sub>max</sub></i> | 4.03  | 4.60  | 4.33  | 3.77  | 4.39  | 4.50  | 4.54  | 4.06  | 4.15  |       | 3.35  | 4.60  | 2.93  | 4.36  |       |          | 4.60   |
|      |                   | <i>S</i>               | 76.99 | 70.13 | 30.58 | 60.92 | 31.30 | 1.57  | 2.36  | 7.89  | 6.16  |       | 3.75  | <0.01 | 1.96  | 0.24  |       |          | 293.85 |
|      |                   | <i>V</i>               | 36.34 | 36.81 | 13.03 | 26.93 | 17.90 | 1.08  | 1.37  | 4.71  | 4.17  |       | 2.09  | <0.01 | 0.96  | 0.17  |       |          | 145.56 |
|      |                   | $\Delta_S$             | 26.20 | 23.86 | 10.41 | 20.73 | 10.65 | 0.53  | 0.80  | 2.69  | 2.10  |       | 1.27  | <0.01 | 0.67  | 0.08  |       |          | 100.00 |
|      |                   | $\Delta_V$             | 24.97 | 25.29 | 8.95  | 18.50 | 12.29 | 0.74  | 0.94  | 3.24  | 2.86  |       | 1.44  | <0.01 | 0.66  | 0.11  |       |          | 100.00 |
| V    | SUTHAZ05<br>150 K | <i>k</i>               | 59    | 70    | 22    | 26    | 19    | 11    | 13    | 3     | 11    | 1     | 4     | 4     |       | 3     | 1     | 247      |        |
|      |                   | <i>d<sub>min</sub></i> | 2.36  | 2.91  | 2.14  | 1.94  | 3.12  | 3.63  | 3.72  | 3.65  | 3.53  | 3.79  | 3.21  | 3.95  |       | 3.79  | 4.22  |          | 1.94   |
|      |                   | <i>d<sub>max</sub></i> | 4.88  | 4.93  | 4.71  | 4.40  | 4.80  | 4.24  | 4.32  | 4.06  | 4.36  | 3.79  | 3.67  | 4.68  |       | 4.94  | 4.22  |          | 4.94   |
|      |                   | <i>S</i>               | 88.30 | 58.93 | 26.06 | 75.51 | 30.27 | 5.85  | 5.18  | 2.03  | 4.87  | 0.30  | 0.71  | 0.62  |       | 1.89  | 2.03  |          | 302.54 |
|      |                   | <i>V</i>               | 47.14 | 32.93 | 12.65 | 33.12 | 18.21 | 3.74  | 3.34  | 1.31  | 3.31  | 0.19  | 0.41  | 0.42  |       | 1.29  | 1.43  |          | 159.48 |
|      |                   | $\Delta_S$             | 29.19 | 19.48 | 8.61  | 24.96 | 10.00 | 1.93  | 1.71  | 0.67  | 1.61  | 0.10  | 0.23  | 0.20  |       | 0.63  | 0.67  |          | 100.00 |
|      |                   | $\Delta_V$             | 29.56 | 20.65 | 7.93  | 20.76 | 11.42 | 2.35  | 2.09  | 0.82  | 2.07  | 0.12  | 0.26  | 0.27  |       | 0.81  | 0.89  |          | 100.00 |
| Va   |                   | <i>k</i>               | 61    | 67    | 21    | 28    | 19    | 9     | 15    | 3     | 10    | 1     | 5     | 4     |       | 3     | 1     | 247      |        |
|      |                   | <i>d<sub>min</sub></i> | 2.36  | 2.91  | 2.14  | 1.94  | 3.12  | 3.63  | 3.72  | 3.65  | 3.53  | 3.79  | 3.21  | 3.95  |       | 3.79  | 4.22  |          | 1.94   |
|      |                   | <i>d<sub>max</sub></i> | 4.88  | 4.93  | 4.71  | 4.40  | 4.80  | 4.24  | 4.32  | 4.06  | 4.36  | 3.79  | 3.67  | 4.68  |       | 4.94  | 4.22  |          | 4.94   |
|      |                   | <i>S</i>               | 91.47 | 57.68 | 25.02 | 80.02 | 30.80 | 5.74  | 5.43  | 2.03  | 3.54  | 0.60  | 0.72  | 0.39  |       | 1.89  | 2.03  |          | 307.36 |
|      |                   | <i>V</i>               | 48.56 | 32.04 | 11.79 | 35.38 | 18.14 | 3.59  | 3.48  | 1.31  | 2.45  | 0.38  | 0.42  | 0.26  |       | 1.29  | 1.43  |          | 160.51 |
|      |                   | $\Delta_S$             | 29.76 | 18.77 | 8.14  | 26.04 | 10.02 | 1.87  | 1.77  | 0.66  | 1.15  | 0.19  | 0.23  | 0.13  |       | 0.62  | 0.66  |          | 100.00 |
|      |                   | $\Delta_V$             | 30.25 | 19.96 | 7.35  | 22.04 | 11.30 | 2.23  | 2.17  | 0.82  | 1.53  | 0.23  | 0.26  | 0.16  |       | 0.80  | 0.89  |          | 100.00 |

Table S3.4. (continued)

| Form      | Refcode                | H···H | H···C | H···N | H···O | H···S | C···C | C···N | C···O | C···S | N···N | N···O | N···S | O···O | O···S | S···S | $\Sigma$ |
|-----------|------------------------|-------|-------|-------|-------|-------|-------|-------|-------|-------|-------|-------|-------|-------|-------|-------|----------|
| <i>Vb</i> | <i>k</i>               | 57    | 73    | 23    | 24    | 19    | 12    | 11    | 3     | 12    |       | 3     | 4     |       | 3     | 1     | 245      |
|           | <i>d<sub>min</sub></i> | 2.50  | 2.94  | 2.44  | 1.94  | 3.12  | 3.64  | 3.74  | 3.65  | 3.53  |       | 3.46  | 4.10  |       | 3.79  | 4.22  | 1.94     |
|           | <i>d<sub>max</sub></i> | 4.88  | 4.93  | 4.71  | 4.23  | 4.80  | 4.24  | 4.32  | 4.06  | 4.36  |       | 3.67  | 4.68  |       | 4.94  | 4.22  | 4.94     |
|           | <i>S</i>               | 85.12 | 60.18 | 27.09 | 71.01 | 29.73 | 5.97  | 4.92  | 2.03  | 6.20  |       | 0.69  | 0.85  |       | 1.89  | 2.03  | 297.72   |
|           | <i>V</i>               | 45.73 | 33.82 | 13.50 | 30.85 | 18.29 | 3.90  | 3.19  | 1.31  | 4.17  |       | 0.40  | 0.58  |       | 1.29  | 1.43  | 158.44   |
|           | $\Delta_S$             | 28.59 | 20.22 | 9.10  | 23.85 | 9.99  | 2.00  | 1.65  | 0.68  | 2.08  |       | 0.23  | 0.28  |       | 0.64  | 0.68  | 100.00   |
|           | $\Delta_V$             | 28.86 | 21.35 | 8.52  | 19.47 | 11.54 | 2.46  | 2.01  | 0.83  | 2.63  |       | 0.25  | 0.37  |       | 0.81  | 0.90  | 100.00   |

Table S3.5. Characteristics of intermolecular noncovalent interactions in chlorpropamide polymorphs (VD polyhedra faces with RF = 0). The temperature at which X-ray diffraction experiments were conducted (as stated in respective .cif files) is provided below the refcodes.

| Form | Refcode           |                        | H···H  | H···C | H···N | H···O  | H···S | H···Cl | C···C | C···N | C···O | C···S | C···Cl | N···N | N···O | N···S | N···Cl | O···O | O···S | O···Cl | S···S | S···Cl | Cl···Cl | Σ    |        |        |
|------|-------------------|------------------------|--------|-------|-------|--------|-------|--------|-------|-------|-------|-------|--------|-------|-------|-------|--------|-------|-------|--------|-------|--------|---------|------|--------|--------|
| α    | BEDMIG10<br>295 K | <i>k</i>               | 72     | 38    | 10    | 36     | 6     | 24     | 6     |       | 20    | 2     | 18     |       | 6     | 2     |        |       | 2     |        |       |        |         | 2    | 244    |        |
|      |                   | <i>d<sub>min</sub></i> | 2.54   | 3.12  | 2.85  | 1.95   | 3.62  | 3.13   | 3.95  |       |       | 3.38  | 3.81   | 3.82  |       | 3.56  | 3.90   |       |       | 3.27   |       |        |         |      | 4.80   | 1.95   |
|      |                   | <i>d<sub>max</sub></i> | 4.75   | 4.74  | 3.89  | 4.44   | 3.90  | 4.32   | 4.13  |       |       | 3.86  | 3.81   | 4.79  |       | 3.81  | 3.90   |       |       | 3.27   |       |        |         |      | 4.80   | 4.80   |
|      |                   | <i>S</i>               | 131.69 | 29.18 | 5.18  | 77.62  | 0.29  | 48.76  | 1.99  |       |       | 17.98 | 0.47   | 12.53 |       | 4.66  | 0.13   |       |       | 4.31   |       |        |         |      | 0.44   | 335.22 |
|      |                   | <i>V</i>               | 65.98  | 17.47 | 2.69  | 35.29  | 0.17  | 27.90  | 1.33  |       |       | 10.83 | 0.30   | 8.35  |       | 2.84  | 0.09   |       |       | 2.35   |       |        |         |      | 0.35   | 175.93 |
|      |                   | <i>Δ<sub>S</sub></i>   | 39.28  | 8.70  | 1.55  | 23.15  | 0.09  | 14.55  | 0.59  |       |       | 5.36  | 0.14   | 3.74  |       | 1.39  | 0.04   |       |       | 1.29   |       |        |         |      | 0.13   | 100.00 |
|      |                   | <i>Δ<sub>V</sub></i>   | 37.50  | 9.93  | 1.53  | 20.06  | 0.10  | 15.86  | 0.75  |       |       | 6.15  | 0.17   | 4.75  |       | 1.61  | 0.05   |       |       | 1.33   |       |        |         |      | 0.20   | 100.00 |
| β    | BEDMIG01<br>295 K | <i>k</i>               | 75     | 54    | 12    | 34     | 2     | 22     | 15    |       | 10    | 4     | 2      |       |       |       | 4      | 3     |       | 6      |       |        |         |      | 243    |        |
|      |                   | <i>d<sub>min</sub></i> | 2.54   | 3.14  | 2.90  | 1.95   | 3.38  | 3.03   | 3.91  |       |       | 3.21  | 3.90   | 3.68  |       |       |        | 3.57  | 3.57  |        | 3.45  |        |         |      | 1.95   |        |
|      |                   | <i>d<sub>max</sub></i> | 4.53   | 4.79  | 4.50  | 4.18   | 3.38  | 4.30   | 4.46  |       |       | 4.32  | 4.13   | 3.68  |       |       |        | 3.97  | 3.98  |        | 3.89  |        |         |      | 4.79   |        |
|      |                   | <i>S</i>               | 136.68 | 30.71 | 8.01  | 83.19  | 0.42  | 42.71  | 6.75  |       |       | 8.64  | 0.34   | 3.89  |       |       |        | 0.94  | 2.03  |        | 14.62 |        |         |      | 338.94 |        |
|      |                   | <i>V</i>               | 70.89  | 18.15 | 4.77  | 39.28  | 0.24  | 24.09  | 4.66  |       |       | 5.12  | 0.23   | 2.39  |       |       |        | 0.62  | 1.33  |        | 8.73  |        |         |      | 180.50 |        |
|      |                   | <i>Δ<sub>S</sub></i>   | 40.33  | 9.06  | 2.36  | 24.55  | 0.12  | 12.60  | 1.99  |       |       | 2.55  | 0.10   | 1.15  |       |       |        | 0.28  | 0.60  |        | 4.31  |        |         |      | 100.00 |        |
|      |                   | <i>Δ<sub>V</sub></i>   | 39.27  | 10.06 | 2.64  | 21.76  | 0.13  | 13.35  | 2.58  |       |       | 2.83  | 0.13   | 1.32  |       |       |        | 0.35  | 0.74  |        | 4.84  |        |         |      | 100.00 |        |
| γ    | BEDMIG02<br>295 K | <i>k</i>               | 74     | 44    | 16    | 36     | 2     | 20     |       |       | 22    | 2     | 6      |       | 2     |       |        | 2     | 6     |        | 2     | 2      | 2       |      | 236    |        |
|      |                   | <i>d<sub>min</sub></i> | 2.60   | 2.92  | 2.94  | 1.97   | 3.55  | 3.15   |       |       | 3.29  | 3.92  | 3.88   |       | 4.99  |       |        |       | 4.36  | 3.80   |       | 4.19   | 4.55    | 1.97 |        |        |
|      |                   | <i>d<sub>max</sub></i> | 4.81   | 4.51  | 4.57  | 4.68   | 3.55  | 4.43   |       |       | 4.89  | 3.92  | 4.42   |       | 4.99  |       |        |       | 4.36  | 4.26   |       | 4.19   | 4.55    | 4.99 |        |        |
|      |                   | <i>S</i>               | 127.73 | 32.81 | 9.05  | 85.47  | 0.37  | 48.67  |       |       | 18.84 | 0.17  | 8.02   |       | 0.04  |       |        |       | 0.62  | 4.25   |       | 0.23   | 0.05    |      | 336.31 |        |
|      |                   | <i>V</i>               | 66.94  | 18.76 | 4.97  | 39.36  | 0.22  | 27.56  |       |       | 11.53 | 0.11  | 5.21   |       | 0.03  |       |        |       | 0.45  | 2.75   |       | 0.16   | 0.04    |      | 178.08 |        |
|      |                   | <i>Δ<sub>S</sub></i>   | 37.98  | 9.76  | 2.69  | 25.41  | 0.11  | 14.47  |       |       | 5.60  | 0.05  | 2.38   |       | 0.01  |       |        |       | 0.18  | 1.26   |       | 0.07   | 0.01    |      | 100.00 |        |
|      |                   | <i>Δ<sub>V</sub></i>   | 37.59  | 10.53 | 2.79  | 22.10  | 0.12  | 15.47  |       |       | 6.47  | 0.06  | 2.93   |       | 0.02  |       |        |       | 0.25  | 1.54   |       | 0.09   | 0.02    |      | 100.00 |        |
| δ    | BEDMIG03<br>295 K | <i>k</i>               | 64     | 66    | 10    | 40     | 6     | 26     |       |       | 8     |       | 12     |       | 4     |       |        |       | 4     |        |       |        |         | 2    | 242    |        |
|      |                   | <i>d<sub>min</sub></i> | 2.31   | 2.86  | 2.99  | 1.96   | 3.29  | 3.10   |       |       | 3.34  |       | 4.34   |       | 3.46  |       |        |       | 3.25  |        |       |        |         | 4.68 | 1.96   |        |
|      |                   | <i>d<sub>max</sub></i> | 4.85   | 4.24  | 3.92  | 3.86   | 3.87  | 4.55   |       |       | 3.86  |       | 4.80   |       | 3.47  |       |        |       | 3.66  |        |       |        |         | 4.68 | 4.85   |        |
|      |                   | <i>S</i>               | 108.04 | 52.22 | 6.71  | 87.90  | 1.20  | 57.59  |       |       | 6.87  |       | 4.76   |       | 2.41  |       |        |       | 4.13  |        |       |        |         | 0.29 | 332.11 |        |
|      |                   | <i>V</i>               | 54.44  | 30.11 | 3.81  | 40.68  | 0.68  | 33.05  |       |       | 3.92  |       | 3.56   |       | 1.39  |       |        |       | 2.27  |        |       |        |         | 0.23 | 174.13 |        |
|      |                   | <i>Δ<sub>S</sub></i>   | 32.53  | 15.72 | 2.02  | 26.47  | 0.36  | 17.34  |       |       | 2.07  |       | 1.43   |       | 0.72  |       |        |       | 1.24  |        |       |        |         | 0.09 | 100.00 |        |
|      |                   | <i>Δ<sub>V</sub></i>   | 31.26  | 17.29 | 2.19  | 23.36  | 0.39  | 18.98  |       |       | 2.25  |       | 2.04   |       | 0.80  |       |        |       | 1.30  |        |       |        |         | 0.13 | 100.00 |        |
| ε    | BEDMIG04<br>295 K | <i>k</i>               | 60     | 66    | 10    | 38     | 2     | 24     |       |       | 4     |       | 8      |       |       |       | 2      |       | 6     |        | 2     |        |         |      | 222    |        |
|      |                   | <i>d<sub>min</sub></i> | 2.54   | 2.87  | 2.97  | 2.02   | 3.83  | 3.19   |       |       | 3.84  |       | 3.51   |       |       |       |        | 4.27  |       | 3.67   |       | 3.99   |         |      | 2.02   |        |
|      |                   | <i>d<sub>max</sub></i> | 4.52   | 5.31  | 3.71  | 4.30   | 3.83  | 4.32   |       |       | 3.84  |       | 4.34   |       |       |       |        | 4.27  |       | 3.85   |       | 3.99   |         |      | 5.31   |        |
|      |                   | <i>S</i>               | 113.22 | 37.70 | 6.38  | 103.91 | 0.20  | 50.85  |       |       | 5.98  |       | 4.32   |       |       |       |        | 0.03  |       | 7.44   |       | 0.19   |         |      | 330.22 |        |
|      |                   | <i>V</i>               | 58.51  | 23.38 | 3.40  | 47.67  | 0.13  | 29.67  |       |       | 3.82  |       | 2.63   |       |       |       |        | 0.02  |       | 4.59   |       | 0.13   |         |      | 173.93 |        |
|      |                   | <i>Δ<sub>S</sub></i>   | 34.29  | 11.42 | 1.93  | 31.47  | 0.06  | 15.40  |       |       | 1.81  |       | 1.31   |       |       |       |        | 0.01  |       | 2.25   |       | 0.06   |         |      | 100.00 |        |
|      |                   | <i>Δ<sub>V</sub></i>   | 33.64  | 13.44 | 1.96  | 27.41  | 0.07  | 17.06  |       |       | 2.20  |       | 1.51   |       |       |       |        | 0.01  |       | 2.64   |       | 0.07   |         |      | 100.00 |        |





Table S3.6. (continued)

| Form        | Refcode           |                        | H···H  | H···C | H···N | H···O  | H···S | C···C | C···N | C···O | C···S | N···N | N···O | N···S | O···O | O···S | S···S | $\Sigma$ |        |
|-------------|-------------------|------------------------|--------|-------|-------|--------|-------|-------|-------|-------|-------|-------|-------|-------|-------|-------|-------|----------|--------|
| II <i>d</i> |                   | <i>k</i>               | 122    | 73    | 17    | 58     | 6     | 6     |       | 1     |       |       |       |       | 2     |       |       | 285      |        |
|             |                   | <i>d<sub>min</sub></i> | 2.25   | 2.79  | 2.84  | 1.92   | 3.27  | 3.51  |       |       | 3.80  |       |       |       |       | 3.79  |       |          | 1.92   |
|             |                   | <i>d<sub>max</sub></i> | 4.61   | 4.32  | 4.35  | 4.37   | 3.92  | 3.76  |       |       | 3.80  |       |       |       |       | 4.19  |       |          | 4.61   |
|             |                   | <i>S</i>               | 187.66 | 53.24 | 10.04 | 116.58 | 1.19  | 1.01  |       |       | <0.01 |       |       |       |       | 0.63  |       |          | 370.37 |
|             |                   | <i>V</i>               | 92.72  | 29.48 | 5.63  | 55.44  | 0.68  | 0.60  |       |       | <0.01 |       |       |       |       | 0.40  |       |          | 184.96 |
|             |                   | $\Delta_S$             | 50.67  | 14.38 | 2.71  | 31.48  | 0.32  | 0.27  |       |       | <0.01 |       |       |       |       | 0.17  |       |          | 100.00 |
|             |                   | $\Delta_V$             | 50.13  | 15.94 | 3.04  | 29.97  | 0.37  | 0.33  |       |       | <0.01 |       |       |       |       | 0.22  |       |          | 100.00 |
| III         | ZZZPUS12<br>150 K | <i>k</i>               | 122    | 74    | 14    | 44     | 10    |       |       |       |       |       |       |       |       |       |       |          | 264    |
|             |                   | <i>d<sub>min</sub></i> | 2.48   | 2.78  | 2.74  | 1.94   | 3.30  |       |       |       |       |       |       |       |       |       |       |          | 1.94   |
|             |                   | <i>d<sub>max</sub></i> | 4.73   | 4.25  | 3.74  | 4.30   | 4.50  |       |       |       |       |       |       |       |       |       |       |          | 4.73   |
|             |                   | <i>S</i>               | 181.89 | 56.60 | 9.54  | 101.65 | 0.53  |       |       |       |       |       |       |       |       |       |       |          | 350.21 |
|             |                   | <i>V</i>               | 95.48  | 31.32 | 5.11  | 45.78  | 0.31  |       |       |       |       |       |       |       |       |       |       |          | 178.00 |
|             |                   | $\Delta_S$             | 51.94  | 16.16 | 2.72  | 29.02  | 0.15  |       |       |       |       |       |       |       |       |       |       |          | 100.00 |
|             |                   | $\Delta_V$             | 53.64  | 17.60 | 2.87  | 25.72  | 0.17  |       |       |       |       |       |       |       |       |       |       |          | 100.00 |
| IV          | ZZZPUS07<br>298 K | <i>k</i>               | 120    | 62    | 14    | 44     | 8     | 17    |       | 6     | 4     |       |       |       | 1     |       |       |          | 276    |
|             |                   | <i>d<sub>min</sub></i> | 2.13   | 2.70  | 3.17  | 1.96   | 3.37  | 3.89  |       |       | 3.75  | 4.19  |       |       |       | 3.93  |       |          | 1.96   |
|             |                   | <i>d<sub>max</sub></i> | 4.63   | 4.93  | 3.90  | 4.71   | 4.39  | 4.21  |       |       | 4.22  | 4.20  |       |       |       | 3.93  |       |          | 4.93   |
|             |                   | <i>S</i>               | 208.68 | 38.84 | 9.23  | 101.46 | 0.28  | 6.83  |       |       | 1.24  | 0.24  |       |       |       | 2.47  |       |          | 369.26 |
|             |                   | <i>V</i>               | 104.85 | 23.59 | 5.38  | 48.13  | 0.16  | 4.56  |       |       | 0.78  | 0.17  |       |       |       | 1.62  |       |          | 189.24 |
|             |                   | $\Delta_S$             | 56.51  | 10.52 | 2.50  | 27.48  | 0.08  | 1.85  |       |       | 0.33  | 0.06  |       |       |       | 0.67  |       |          | 100.00 |
|             |                   | $\Delta_V$             | 55.41  | 12.47 | 2.84  | 25.44  | 0.09  | 2.41  |       |       | 0.41  | 0.09  |       |       |       | 0.85  |       |          | 100.00 |
| V           | ZZZPUS10<br>298 K | <i>k</i>               | 116    | 60    | 18    | 48     | 6     | 17    |       | 4     | 4     |       |       |       | 1     |       |       |          | 274    |
|             |                   | <i>d<sub>min</sub></i> | 2.43   | 3.03  | 2.95  | 2.11   | 3.50  | 3.68  |       |       | 3.50  | 4.19  |       |       |       | 3.98  |       |          | 2.11   |
|             |                   | <i>d<sub>max</sub></i> | 4.44   | 4.90  | 4.31  | 4.25   | 3.91  | 5.25  |       |       | 4.38  | 4.47  |       |       |       | 3.98  |       |          | 5.25   |
|             |                   | <i>S</i>               | 201.86 | 39.10 | 10.88 | 102.15 | 0.26  | 6.74  |       |       | 1.71  | 0.16  |       |       |       | 0.91  |       |          | 363.76 |
|             |                   | <i>V</i>               | 101.86 | 22.96 | 6.34  | 50.26  | 0.17  | 4.80  |       |       | 1.07  | 0.11  |       |       |       | 0.60  |       |          | 188.16 |
|             |                   | $\Delta_S$             | 55.49  | 10.75 | 2.99  | 28.08  | 0.07  | 1.85  |       |       | 0.47  | 0.04  |       |       |       | 0.25  |       |          | 100.00 |
|             |                   | $\Delta_V$             | 54.13  | 12.20 | 3.37  | 26.71  | 0.09  | 2.55  |       |       | 0.57  | 0.06  |       |       |       | 0.32  |       |          | 100.00 |

Table S4. Average partial contributions of volumes of pyramids ( $R_V$ , %), corresponding to covalent ( $RF = 1$ ), intramolecular noncovalent ( $RF > 1$ ) and intermolecular ( $RF = 0$ ) interactions, to the total volume of molecular VD polyhedra in a series of highly polymorphic crystal structures

| Refcode family                        | Polymorphs                        | Molecules                        | $R_V$ , %                                                    |        |        | Reference (numbering as in the main article) |
|---------------------------------------|-----------------------------------|----------------------------------|--------------------------------------------------------------|--------|--------|----------------------------------------------|
|                                       |                                   |                                  | RF = 1                                                       | RF > 1 | RF = 0 |                                              |
| BEWKUJ                                | 5                                 | 7                                | 28                                                           | 17     | 54     | This work                                    |
| SLFNMA                                | 3                                 | 4                                | 26                                                           | 21     | 54     |                                              |
| SLFNMB                                | 4                                 | 4                                | 25                                                           | 21     | 54     |                                              |
| SUTHAZ                                | 5                                 | 8                                | 28                                                           | 16     | 56     |                                              |
| BEDMIG                                | 5                                 | 5                                | 22                                                           | 24     | 54     |                                              |
| ZZZPUS                                | 5                                 | 8                                | 21                                                           | 27     | 52     |                                              |
| TOKSAO                                | 4                                 | 9                                | 28                                                           | 15     | 57     | 23                                           |
| BIXGIY                                | 4                                 | 4                                | 27                                                           | 18     | 55     |                                              |
| KAXXAI                                | 9                                 | 11                               | 26                                                           | 20     | 54     |                                              |
| MOTNUF                                | 4                                 | 17                               | 27                                                           | 20     | 53     |                                              |
| QAXMEH                                | 12                                | 14                               | 26                                                           | 17     | 57     | 25                                           |
| DOR . . .                             | 11                                | 12                               | 28                                                           | 22     | 50     | 22                                           |
| DORDUM                                | 10                                | 12                               | 28                                                           | 22     | 50     | 21                                           |
| MELFIT                                | 9                                 | 12                               | 21                                                           | 28     | 51     | 20                                           |
| FPAMCA                                | 8                                 | 27                               | 30                                                           | 10     | 60     | 19                                           |
| SALOXM                                | 4                                 | 5                                | 28                                                           | 13     | 59     | 18                                           |
| GLYCIN                                | 5                                 | 5                                | 17                                                           | 21     | 62     |                                              |
| PUBMUU                                | 20                                | 21                               | 24                                                           | 27     | 49     |                                              |
| SALCAN                                | 3                                 | 4                                | 27                                                           | 15     | 58     | 24                                           |
| RIGHUK                                | 3                                 | 4                                | 25                                                           | 21     | 54     |                                              |
| ZOGQAN                                | 3                                 | 4                                | 28                                                           | 19     | 53     |                                              |
| ATIWOP                                | 2                                 | 2                                | 23                                                           | 30     | 47     |                                              |
| MOPNAH                                | 3                                 | 3                                | 22                                                           | 28     | 50     |                                              |
| FOGVIG                                | 4                                 | 4                                | 22                                                           | 27     | 51     | 17                                           |
| QAXMEH*                               | 7                                 | 7                                | 26                                                           | 17     | 57     |                                              |
| SUTHAZ*                               | 6                                 | 9                                | 27                                                           | 17     | 56     |                                              |
| SULAMD                                | 4                                 | 4                                | 26                                                           | 18     | 56     |                                              |
| SLFNMB*                               | 4                                 | 4                                | 25                                                           | 21     | 54     |                                              |
| LILHAP                                | 2                                 | 2                                | 29                                                           | 15     | 56     |                                              |
| LILHAP*                               | 2                                 | 2                                | 29                                                           | 15     | 56     | 16                                           |
| QAXMEH*                               | 7                                 | 7                                | 26                                                           | 17     | 57     |                                              |
| SLFNMB*                               | 4                                 | 4                                | 25                                                           | 21     | 54     |                                              |
| SLFNMA*                               | 3                                 | 4                                | 27                                                           | 20     | 53     |                                              |
| 26 unique refcode families (33 total) | 151 unique polymorphs (184 total) | 212 unique molecules (249 total) | Average values with standard deviations for unique molecules |        |        |                                              |
|                                       |                                   |                                  | 25(3)                                                        | 20(5)  | 54(4)  |                                              |

\* The marked polymorphic compounds were not counted as ‘unique’ and their characteristics were not averaged in the last row as the MVDP data on them were updated in later publications.
